# Supplementary material for: Selective targeting of CD38 hydrolase and cyclase activity as an approach to immunostimulation
Source: Royal Society of Chemistry journal article supplement (doi:10.1039/d1ra06266b), 2021-01-01
Supplement: d1ra06266b1.pdf [file d1ra06266b1.pdf]

## Selective Targeting of CD38 Hydrolase and Cyclase Activity as an Approach to Immunostimulation

Thomas Z. Benton,<sup>a</sup> Catherine M. Mills,<sup>a</sup> Jonathan M. Turner,<sup>a</sup> Megan J. Francis,<sup>a</sup> Dalan J. Solomon,<sup>a</sup> Pieter B. Burger,<sup>a</sup> Yuri K. Peterson,<sup>a</sup> Nathan G. Dolloff,<sup>b</sup> Andre S. Bachmann,<sup>c</sup> Patrick M. Woster <sup>\*a</sup>

<sup>a</sup>Dept. of Drug Discovery and Biomedical Sciences, Medical University of South Carolina, 70 President St., Charleston, SC 29425.

<sup>b</sup>Dept. of Cell and Molecular Pharmacology and Experimental Therapeutics, Medical University of South Carolina, 173 Ashley Ave., Charleston, SC 29425.

<sup>c</sup>Dept. of Pediatrics and Human Development, College of Human Medicine, Michigan State University, 400 Monroe Ave. NW, Grand Rapids, MI 49503.

### Supporting Information

#### In Silico Analysis

A modified PDB was prepared from PDB 4XJT (human CD38 complexed with inhibitor 2 [4-[(2,6-dimethylbenzyl)amino]-2-methylquinoline-8-carboxamide]). PDB 4XJT was imported into the AMBER10 program, and prepared by first breaking the bond between ADPr phosphate and Gln226 (mutated from Glu226) followed by substitution of a hydroxyl on the 1' position of ADPr phosphate. The Gln226 was repacked as Glu226. The 2' phosphate was removed from ADPr phosphate rendering ADPr. The complex was protonated at 310 K and pH 7.4 and was minimized. A compound (ligand) database of the 100 compounds populating the curated database outlined in the main manuscript was created, and structures were protonated at pH 7.4 and minimized. The 2-methylquinoline-8-carboxamide inhibitor in PDB 4XJT was removed from the complex and dummy atoms were used to map the active site. Compounds were docked into the active site using a triangle matcher and 50 poses were scored using London dG. Placements were further refined using an induced fit method and the top 5 poses were scored with GBVI/WSA dG. The docking campaign was designed such that ADPr and CD38 active site moieties would interact with docking compounds—simulating uncompetitive binding. Protein Ligand Interaction Fingerprints (PLIFs) were used to assess and annotate predictive binding poses along with observations from cocrystal structures described herein. The resulting preliminary binding poses were analyzed and visualized using the Molecular Operating Environment ([MOE](#), Montreal, Quebec, Canada).

#### Synthesis

All reagents and dry solvents were purchased from Aldrich Chemical Co. (Milwaukee, WI), Sigma Chemical Co. (St. Louis, MO), VWR (Radnor, PA) or Fisher Scientific (Chicago, IL) and were used without further purification except as noted below. Triethylamine was distilled from potassium hydroxide and stored in a nitrogen atmosphere. Dry methanol, ethyl acetate, tetrahydrofuran, dimethyl formamide and hexane were either purchased (VWR) or prepared using a Glass Contour Solvent Purification System (Pure Process Technology, LLC, Nashua, NH). Microwave synthetic procedures were conducted on an Initiator 8 microwave synthesizer (Biotage, Charlotte, NC). Preparative scale chromatographic procedures were carried out using a Biotage Selekt chromatography system (Biotage, Charlotte, NC) fitted with silica gel 60 cartridges (230-440 mesh). Thin layer chromatography was conducted on Merck precoated silica gel 60 F-254. Apigenin, quercetin and compound **17** were purchased from Selleckchem (Houston, TX), and compounds **1-16** were purchased from Chembridge (San Diego, CA).

All  $^1\text{H}$ - and  $^{13}\text{C}$ -NMR spectra were recorded on a Bruker Avance 600 MHz spectrometer, and all chemical shifts are reported as  $\delta$  values referenced to TMS or DSS. Splitting patterns are indicated as follows: s, singlet; d, doublet; t, triplet; m, multiplet; br, broad peak. In all cases,  $^1\text{H}$ -NMR,  $^{13}\text{C}$ -NMR and MS spectra were consistent with assigned structures, and  $^{13}\text{C}$  peak assignments appear on the spectrum. . Mass spectra were recorded by LC/MS on a Waters UPLC/MS system with a model QDa mass spectrometer detector. Prior to biological testing procedures, all compounds were determined to be >95% pure by UPLC chromatography (9:1  $\text{H}_2\text{O}$ : acetonitrile, +0.1% formic acid to 1:9  $\text{H}_2\text{O}$ / acetonitrile +0.1% formic acid over 8 minutes) using a Waters Acquity H-series ultrahigh-performance liquid chromatograph fitted with a C18 reversed-phase column (Acquity UPLC BEH C18 1.7 M, 2.1 X 100 mm). Compounds **20-46** were synthesized according to the general procedure described below.

**Scheme S1**

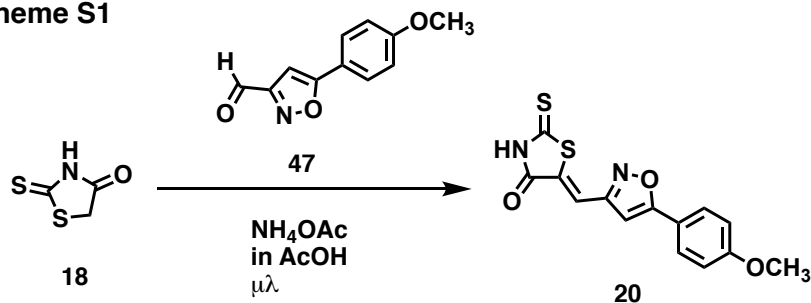

**Synthesis of (Z)-5-((5-(4-methoxyphenyl)isoxazol-3-yl)methylene)-2-thioxothiazolidin-4-one (**20**).**

A 0.05 g portion of 2-thioxothiazolidin-4-one **18** (0.43 mmol), 0.087 g (0.43 mmol) of 5-(4-methoxyphenyl)isoxazole-3-carbaldehyde **47** and 0.66 mg (0.86 mmol) of ammonium acetate were added to a microwave vial along with 2 mL of glacial acetic acid, a stirring bar was added and the vial was sealed. The sealed vial was microwave irradiated for 10 minutes at 180 °C, during which time the reaction mixture changed from a colorless solution to a vibrant orange-yellow suspension. The reaction mixture was allowed to cool to room temperature, the vial was opened and completion of the reaction was verified by TLC (1:1 EtOAc/hexane). The reaction product was precipitated by adding 5 mL of water, the mixture was centrifuged (10,000 X G, 10°C, 5 minutes) and the liquid was decanted. The resulting solid was then washed with an additional 5 mL of water, re-centrifuged and the liquid was decanted. Residual water was removed from the solid by lyophilization to afford (Z)-5-((5-(4-methoxyphenyl)isoxazol-3-yl)methylene)-2-thioxothiazolidin-4-one **20** (104 mg, 76.1%) as a yellowish solid.  $^1\text{H}$  NMR (600 MHz,  $\text{D}_6$ -DMSO/TMS):  $\delta$  7.84 (d,  $J$  = 8.7 Hz, 2H, H-7, H-11), 7.49 (s, 1H, H-21), 7.19 (s, 1H, H-4), 7.13–7.09 (m, 2H, H-10, H-8), 3.83 ppm (s, 3H, H-13).  $^{13}\text{C}$  NMR (600 MHz,  $\text{D}_6$ -DMSO/TMS)  $\delta$  55.48 ( $\text{CH}_3\text{-O}$ ); 100.39 (N-C-CH); 114.85 (O-C-CH); 116.38 (O-C-CH); 127.60 (CH-C); 158.24 (N-C); 161.30 (O-C); 168.68 (CO); 170.05 (CS). UPLC retention time: 7.23 min. MS: calculated, 319.3650, found, 318.9710.

**Synthesis of (Z)-5-(4-(methylsulfonyl)benzylidene)-2-thioxothiazolidin-4-one (**21**).**

Compound **21** was synthesized from 2-thioxothiazolidin-4-one and 4-(methylsulfonyl)benzaldehyde exactly as described for compound **20** and isolated as a dark yellow solid in 71.2% yield.  $^1\text{H}$  NMR (600 MHz,  $\text{D}_6$ -DMSO/TMS)  $\delta$  7.84 (d,  $J$  = 8.7 Hz, 2H, H-7, H-11), 7.49 (s, 1H, H-21), 7.19 (s, 1H, H-4), 7.13–7.09 (m, 2H, H-10, H-8), 3.83 ppm (s, 3H, H-13).  $^{13}\text{C}$  NMR (600 MHz,  $\text{D}_6$ -DMSO/TMS)  $\delta$  43.80 ( $\text{CH}_3$ ); 128.18 (C-CH); 129.61 (C-CH); 129.66 (C-CH); 138.18 (C-CH); 142.02 (C-CH); 195.84 (CS). UPLC retention time: 5.21 min. MS: calculated, 298.3770, found, 298.0614.

**Synthesis of (Z)-2-thioxo-5-(4-(trifluoromethoxy)benzylidene)thiazolidin-4-one (**22**).**

Compound **22** was synthesized from 2-thioxothiazolidin-4-one and 4-(trifluoromethoxy)benzaldehyde exactly as described for compound **20** and isolated as a dark orange-yellow solid in 70.4% yield. <sup>1</sup>H NMR (600 MHz, D<sub>6</sub>-DMSO/TMS) δ 7.75–7.67 (m, 3H, H-7, H-18, H-9), 7.52 ppm (d, J = 8.0 Hz, 2H, H-10, H-17). <sup>13</sup>C NMR (600 MHz, D<sub>6</sub>-DMSO/TMS) δ 122.07 (C-CH); 127.16 (C-CH); 130.32 (C-CH); 132.63 (C-CH); 132.90 (C-CH); 149.76 (C-CH); 169.71 (CO); 195.89 (CS). UPLC retention time 7.56 min. MS: calculated, 304.2892, found, 304.0641.

*Synthesis of (Z)-2-thioxo-5-(4-(trifluoromethyl)benzylidene)thiazolidin-4-one (23).*

Compound **23** was synthesized from 2-thioxothiazolidin-4-one and 4-(trifluoromethyl)benzaldehyde exactly as described for compound **20** and isolated as a yellow solid in 79.8% yield. <sup>1</sup>H NMR (600 MHz, D<sub>6</sub>-DMSO/TMS) δ 7.90–7.79 (m, 4H, H-10, H-16, H-17, H-9), 7.71 ppm (s, 1H, H-7). UPLC retention time 7.43 min. MS calculated, 288.0568, found, 288.0568.

*Synthesis of (Z)-5-((4'-methoxy-[1,1'-biphenyl]-4-yl)methylene)-3-methyl-2-thioxothiazolidin-4-one (24).*

Compound **24** was synthesized from 3-methyl-2-thioxothiazolidin-4-one and 4'-methoxy-[1,1'-biphenyl]-4-carbaldehyde exactly as described for compound **20** and isolated as a yellow solid in 70.6% yield. <sup>1</sup>H NMR (600 MHz, D<sub>6</sub>-DMSO/TMS) δ 7.85–7.82 (m, 3H), 7.74–7.69 (m, 4H), 7.05 (d, J = 8.7 Hz, 2H), 3.81 (s, 3H, H-23), 3.41 ppm (s, 3H, H-8). <sup>13</sup>C NMR (600 MHz, D<sub>6</sub>-DMSO/TMS) δ 55.74 (CH<sub>3</sub>); 115.08 (C-CH); 127.40 (C-CH); 128.55 (C-CH); 131.87 (C-CH); 132.97 (C-CH). UPLC retention time 8.817 min. MS calculated, 342.05442, found, 342.0713.

*Synthesis of (Z)-5-(quinolin-6-ylmethylene)-2-thioxothiazolidin-4-one (25).*

Compound **25** was synthesized from 2-thioxothiazolidin-4-one and quinoline-6-carbaldehyde exactly as described for compound **20** and isolated as a light yellow solid in 50.7% yield. <sup>1</sup>H NMR (600 MHz, D<sub>6</sub>-DMSO/TMS) δ 8.97 (dd, J = 0.9, 4.1 Hz, 1H), 8.52 (d, J = 8.2 Hz, 1H), 8.22 (s, 1H), 8.11 (d, J = 8.7 Hz, 1H), 7.93 (dd, J = 1.8, 8.7 Hz, 1H), 7.80 (s, 1H), 7.61 ppm (dd, J = 4.2, 8.3 Hz, 1H, H-11). <sup>13</sup>C NMR (600 MHz, D<sub>6</sub>-DMSO/TMS) δ 123.00 (C-CH); 128.42 (C-CH); 130.52 (C-CH); 130.71 (C-CH); 130.89 (C-CH); 131.51 (C-CH); 137.41 (C-CH); 148.21 (CO); 152.79 (C-CH); 196.41 (CS). UPLC retention time 1.55 min. MS calculated, 273.00780, found, 272.9719.

*Synthesis of (Z)-5-(dibenzo[b,d]furan-2-ylmethylene)-2-thioxothiazolidin-4-one (26).*

Compound **26** was synthesized from 2-thioxothiazolidin-4-one and dibenzo[b,d]furan-2-carbaldehyde exactly as described for compound **20** and isolated as an off-white solid in 71.1% yield. <sup>1</sup>H NMR (600 MHz, D<sub>6</sub>-DMSO/TMS) δ 8.31 (s, 1H, H-8), 8.20 (d, J = 7.7 Hz, 1H), 7.83 (d, J = 8.6 Hz, 1H), 7.77 (s, 1H), 7.72 (d, J = 8.5 Hz, 2H), 7.57 (t, J = 7.7 Hz, 1H), 7.44 ppm (t, J = 7.4 Hz, 1H). <sup>13</sup>C NMR (600 MHz, D<sub>6</sub>-DMSO/TMS) δ 112.36 (C-CH); 113.34 (C-CH); 122.18 (C-CH); 123.18 (C-CH); 123.90 (C-CH); 124.20 (C-CH); 125.24 (C-CH); 128.82 (C-CH); 129.06 (C-CH); 130.66 (C-CH); 132.32 (C-CH); 156.81 (CO). UPLC retention time 7.94 min. MS calculated, 311.00747, found, 312.0881.

*Synthesis of (Z)-5-(4-phenoxybenzylidene)-2-thioxothiazolidin-4-one (27).*

Compound **27** was synthesized from 2-thioxothiazolidin-4-one and 4-phenoxybenzaldehyde exactly as described for compound **20** and isolated as a yellow solid in 55.9% yield. <sup>1</sup>H NMR (600 MHz, D<sub>6</sub>-DMSO/TMS) δ 7.62–7.59 (m, 3H), 7.47–7.42 (m, 2H), 7.25–7.07 ppm (m, 5H). <sup>13</sup>C NMR (600 MHz, D<sub>6</sub>-DMSO/TMS) δ 117.96 (C-CH); 120.19 (C-CH); 124.25 (C-CH); 125.14 (C-CH); 128.12 (C-CH); 130.17 (C-CH); 131.66 (C-CH); 133.23 (C-CH); 155.54 (C-CH); 159.66 (C-CH); 169.84 (CO); 195.96 (CS). UPLC retention time 7.73 min. MS calculated, 314.02312, found, 314.0204.

*Synthesis of (Z)-5-((2,3-dihydrobenzo[b][1,4]dioxin-6-yl)methylene)-2-thioxothiazolidin-4-one (28).*

Compound **28** was synthesized from 2-thioxothiazolidin-4-one and 2,3-dihydrobenzo[b][1,4]dioxine-6-carbaldehyde exactly as described for compound **20** and isolated as a dark orange solid in 63.8% yield. <sup>1</sup>H NMR (600 MHz, D<sub>6</sub>-DMSO/TMS) δ 7.52 (s, 1H, H-15), 7.09–7.06 (m, 2H), 7.00 (d, J = 8.5 Hz, 1H), 4.30 ppm (dd, J = 4.5, 17.6 Hz, 4H, H-13, H-14). <sup>13</sup>C NMR (600 MHz, D<sub>6</sub>-DMSO/TMS) δ 64.46 (CH<sub>2</sub>); 65.01 (CH<sub>2</sub>); 118.65 (C-CH); 118.67 (C-CH); 119.60 (C-CH); 119.62 (C-CH); 124.84 (C-CH);

124.86 (C-CH); 126.73 (C-CH); 132.22 (C-CH); 132.24 (CO); 144.29 (CS). UPLC retention time 5.83 min. MS calculated, 280.00238, found, 279.9747.

*Synthesis of (Z)-5-((4'-methyl-[1,1'-biphenyl]-3-yl)methylene)-2-thioxothiazolidin-4-one (29)*

Compound **29** was synthesized from 2-thioxothiazolidin-4-one and 4'-methyl-[1,1'-biphenyl]-3-carbaldehyde exactly as described for compound **20** and isolated as a dark red-orange solid in 64.3% yield. <sup>1</sup>H NMR (600 MHz, D<sub>6</sub>-DMSO/TMS) δ 7.80 (s, 1H, H-8), 7.74–7.55 (m, 5H), 7.50 (d, J = 7.7 Hz, 1H), 7.28 (d, J = 7.7 Hz, 2H), 2.35–2.31 ppm (m, 3H, H-21). <sup>13</sup>C NMR (600 MHz, D<sub>6</sub>-DMSO/TMS) δ 21.15 (CH<sub>3</sub>); 126.43 (C-CH); 127.07 (C-CH); 129.09 (C-CH); 129.13 (C-CH); 130.08 (C-CH); 130.17 (C-CH); 130.52 (C-CH); 132.10 (C-CH); 134.14 (C-CH); 136.62 (C-CH); 137.93 (C-CH); 141.59 (C-CH); 169.90 (CO); 196.13 (CS). UPLC retention time 8.34 min. MS calculated, 312.04386, found, 312.0044.

*Synthesis of (Z)-5-((6-chloro-[1,3]dioxolo[4,5-g]quinolin-7-yl)methylene)-2-thioxothiazolidin-4-one (30)*

Compound **30** was synthesized from 2-thioxothiazolidin-4-one and 6-chloro-[1,3]dioxolo[4,5-g]quinoline-7-carbaldehyde exactly as described for compound **20** and isolated as a dark orange solid in 40.2% yield. <sup>1</sup>H NMR (600 MHz, D<sub>6</sub>-DMSO/TMS) δ 8.12 (s, 1H), 7.65 (s, 1H), 7.58 (s, 1H), 7.28 (s, 1H), 6.25 ppm (s, 2H, H-18). <sup>13</sup>C NMR (600 MHz, D<sub>6</sub>-DMSO/TMS) δ 60.73 (CH<sub>2</sub>); 72.71 (C-CH); 103.41 (C-CH); 104.05 (C-CH); 104.68 (C-CH); 123.63 (C-CH); 124.49 (C-CH); 125.25 (C-CH); 137.04 (C-CH); 145.98 (C-CH); 148.00 (C-CH); 149.25 (C-CH); 153.55 (CO). UPLC retention time 6.48 min. MS calculated, 350.95866, found, 350.9773.

*Synthesis of (Z)-5-((9H-fluoren-3-yl)methylene)-2-thioxothiazolidin-4-one (31)*

Compound **31** was synthesized from 2-thioxothiazolidin-4-one and 9H-fluorene-3-carbaldehyde exactly as described for compound **20** and isolated as an orange solid in 72.4% yield. <sup>1</sup>H NMR (600 MHz, D<sub>6</sub>-DMSO/TMS) δ 8.06–8.03 (m, 1H), 7.97 (s, 1H, H-8), 7.78–7.68 (m, 2H), 7.62 (s, 2H), 7.44–7.36 (m, 2H), 4.00 ppm (s, 2H, H-9). <sup>13</sup>C NMR (600 MHz, D<sub>6</sub>-DMSO/TMS) δ 36.89 (CH<sub>2</sub>); 121.33 (C-CH); 121.41 (C-CH); 125.82 (C-CH); 127.41 (C-CH); 127.56 (C-CH); 128.53 (C-CH); 130.57 (C-CH); 131.85 (C-CH); 132.71 (C-CH); 144.21 (C-CH); 144.62 (C-CH); 170.02 (CO). UPLC retention time 8.10 min. MS calculated, 310.02821, found, 309.9631.

*Synthesis of (Z)-2-thioxo-5-((4'-(trifluoromethyl)-[1,1'-biphenyl]-4-yl)methylene)thiazolidin-4-one (32)*

Compound **32** was synthesized from 2-thioxothiazolidin-4-one and 4'-(trifluoromethyl)-[1,1'-biphenyl]-4-carbaldehyde exactly as described for compound **20** and isolated as an orange solid in 66.5% yield. <sup>1</sup>H NMR (600 MHz, D<sub>6</sub>-DMSO/TMS) δ 7.99–7.69 ppm (m, 9H). <sup>13</sup>C NMR (600 MHz, D<sub>6</sub>-DMSO/TMS) δ 125.95 (CF<sub>3</sub>, C-CH); 127.60 (C-CH); 127.79 (C-CH); 127.99 (C-CH); 130.90 (C-CH); 131.23 (C-CH); 132.12 (C-CH); 140.34 (C-CH); 142.81 (C-CH); 169.36 (CO). UPLC retention time 8.51 min. MS: calculated, 364.3882, found, 364.0916.

*Synthesis of (Z)-5-((4'-methyl-[1,1'-biphenyl]-4-yl)methylene)-2-thioxothiazolidin-4-one (33)*

Compound **33** was synthesized from 2-thioxothiazolidin-4-one and 4'-methyl-[1,1'-biphenyl]-4-carbaldehyde exactly as described for compound **20** and isolated as a yellow solid in 77.6% yield. <sup>1</sup>H NMR (600 MHz, D<sub>6</sub>-DMSO/TMS) δ 7.85–7.81 (m, 2H), 7.68–7.62 (m, 5H), 7.30 (d, J = 7.4 Hz, 2H), 2.34 ppm (s, 3H, H-16). <sup>13</sup>C NMR (600 MHz, D<sub>6</sub>-DMSO/TMS) δ 20.74 (CH<sub>3</sub>); 125.04 (C-CH); 126.67 (C-CH); 127.23 (C-CH); 129.75 (C-CH, C-CH); 131.22 (C-CH); 137.94 (C-CH); 142.08 (C-CH); 169.39 (CO); 195.54 (CS). UPLC retention time 8.50 min. MS calculated, 310.4170, found, 310.0669.

*Synthesis of (Z)-5-(4-(pyridin-2-yl)benzylidene)-2-thioxothiazolidin-4-one (34)*

Compound **34** was synthesized from 2-thioxothiazolidin-4-one and 4-(pyridin-2-yl)benzaldehyde exactly as described for compound **20** and isolated as a yellow solid in 68.8% yield. <sup>1</sup>H NMR (600 MHz, D<sub>6</sub>-DMSO/TMS) δ 8.69 (d, J = 4.6 Hz, 1H), 8.23 (d, J = 8.2 Hz, 2H), 8.02 (d, J = 8.0 Hz, 1H), 7.90 (t, J = 7.6 Hz, 1H), 7.70–7.65 (m, 3H), 7.41–7.36 ppm (m, 1H). <sup>13</sup>C NMR (600 MHz, D<sub>6</sub>-DMSO/TMS) δ 121.30 (C-CH); 123.82 (C-CH); 127.81 (C-CH); 131.39 (C-CH); 131.43 (C-CH); 133.92 (C-CH); 137.98 (C-



CH); 140.78 (C-CH); 155.11 (CO). UPLC retention time 5.56 min. MS calculated, 299.02345, found, 298.9749.

*Synthesis of (Z)-2-thioxo-5-((5-(3-(trifluoromethyl)phenyl)furan-2-yl)methylene)thiazolidin-4-one (35).*  
Compound **35** was synthesized from 2-thioxothiazolidin-4-one and 5-(3-(trifluoromethyl)phenyl)furan-2-carbaldehyde exactly as described for compound **20** and isolated as a yellow solid in 69.0% yield. <sup>1</sup>H NMR (600 MHz, D<sub>6</sub>-DMSO/TMS) δ 8.08 (s, 1H, H-7), 8.03 (d, J = 7.7 Hz, 1H), 7.77–7.70 (m, 2H), 7.47–7.45 (m, 2H), 7.27 ppm (d, J = 3.7 Hz, 1H). <sup>13</sup>C NMR (600 MHz, D<sub>6</sub>-DMSO/TMS) δ 111.98 (C-CH); 117.46 (C-CH); 121.07 (C-CH); 122.56 (C-CH); 123.35 (C-CH); 125.73 (C-CH); 128.25 (C-CH); 130.03 (C-CH); 130.47 (CF<sub>3</sub>); 130.68 (CF<sub>3</sub>); 131.03 (C-CH); 150.12 (C-CH); 156.13 (C-CH); 169.37 (CO); 196.52 (CS). UPLC retention time 7.69 min. MS calculated, 355.99485, found, 356.0168.

*Synthesis of (Z)-5-((6-methoxynaphthalen-2-yl)methylene)-2-thioxothiazolidin-4-one (36).*  
Compound **36** was synthesized from 2-thioxothiazolidin-4-one and 6-methoxy-2-naphthaldehyde exactly as described for compound **20** and isolated as an orange solid in 68.4% yield. <sup>1</sup>H NMR (600 MHz, D<sub>6</sub>-DMSO/TMS) δ 8.04 (s, 1H), 7.91 (dd, J = 8.8, 29.0 Hz, 2H), 7.68 (s, 1H, H-8), 7.56 (dd, J = 1.3, 8.6 Hz, 1H), 7.34 (d, J = 1.8 Hz, 1H), 7.22 (dd, J = 2.3, 9.0 Hz, 1H), 3.89 ppm (s, 3H, H-20). <sup>13</sup>C NMR (600 MHz, D<sub>6</sub>-DMSO/TMS) δ 55.93 (CH<sub>3</sub>); 106.687 (C-CH); 120.26 (C-CH); 127.39 (C-CH); 128.41 (C-CH); 128.70 (); 131.07 (C-CH); 132.04 (C-CH); 132.49 (C-CH); 135.69 (C-CH); 159.66 (CO). UPLC retention time 7.20 min. MS calculated, 302.02312, found, 301.9300.

*Synthesis of (Z)-5-((4'-methyl-[1,1'-biphenyl]-4-yl)methylene)-2-thioxothiazolidin-4-one (37).*  
Compound **37** was synthesized from 2-thioxothiazolidin-4-one and 4'-methyl-[1,1'-biphenyl]-4-carbaldehyde exactly as described for compound **20** and isolated as an off-white solid in 50.3% yield. <sup>1</sup>H NMR (600 MHz, D<sub>6</sub>-DMSO/TMS) δ 11.10–11.07 (m, 1H, H-5), 7.84–7.82 (m, 3H, H-12, H-8, H-6), 7.70 (d, J = 8.2 Hz, 2H, H-11, H-9), 7.66–7.62 (m, 2H, H-18, H-14), 7.33–7.29 (m, 2H, H-17, H-15), 2.37 ppm (s, 3H, H-19). <sup>13</sup>C NMR (600 MHz, D<sub>6</sub>-DMSO/TMS) δ 21.18 (CH<sub>3</sub>); 123.61 (C-CH); 127.08 (C-CH); 127.54 (C-CH); 130.15 (C-CH); 131.15 (C-CH); 131.85 (C-CH); 132.24 (C-CH); 136.40 (C-CH); 138.21 (C-CH); 142.19 (C-CH); 167.82 (CO); 168.26 (CO). UPLC retention time 7.61 min. MS, calculated, 294.3560, found, 294.1762.

*Synthesis of (Z)-5-(4-(benzyloxy)benzylidene)-2-thioxothiazolidin-4-one (38).*  
Compound **38** was synthesized from 2-thioxothiazolidin-4-one and 4-(benzyloxy)benzaldehyde exactly as described for compound **20** and isolated as a yellow-orange solid in 16.8% yield. <sup>1</sup>H NMR (600 MHz, D<sub>6</sub>-DMSO/TMS) δ 12.18 (s, 1H, H-5), 7.61–7.58 (m, 3H), 7.50 (d, J = 7.4 Hz, 2H), 7.40 (t, J = 7.6 Hz, 2H), 7.34 (t, J = 7.3 Hz, 1H), 7.23–7.20 (m, 2H), 5.20 ppm (s, 2H, H-16). <sup>13</sup>C NMR (600 MHz, D<sub>6</sub>-DMSO/TMS) δ 70.06 (CH<sub>2</sub>); 116.36 (C-CH); 122.89 (C-CH); 126.17 (C-CH); 128.27 (C-CH); 128.50 (C-CH); 128.96 (C-CH); 132.27 (C-CH); 133.13 (C-CH); 136.92 (C-CH); 160.91 (C-CH); 169.88 (CO); 195.95 (CS). UPLC retention time 8.49 min. MS calculated, 328.03877, found, 328.0041.

*Synthesis of (Z)-2-thioxo-5-(3,4,5-trimethoxybenzylidene)thiazolidin-4-one (39).*  
Compound **39** was synthesized from 2-thioxothiazolidin-4-one and 3,4,5-trimethoxybenzaldehyde exactly as described for compound **20** and isolated as a dark red-orange solid in 8.3% yield. <sup>1</sup>H NMR (600 MHz, D<sub>6</sub>-DMSO/TMS) δ 12.21 (d, J = 20.6 Hz, 1H, H-17), 7.57 (s, 1H, H-13), 6.90 (s, 2H, H-2, H-6), 3.92 (s, 6H, H-12, H-10), 3.81 ppm (s, 3H, H-11). <sup>13</sup>C NMR (600 MHz, D<sub>6</sub>-DMSO/TMS) δ 56.56 (O-CH<sub>3</sub>); 60.72 (O-CH<sub>3</sub>); 108.51 (C-CH); 128.93 (C-CH); 132.51 (C-CH); 153.78 (CO). UPLC retention time 5.74 min. MS calculated, 312.02860, found, 311.9912.

*Synthesis of (Z)-5-([1,1'-biphenyl]-4-ylmethylene)-2-thioxothiazolidin-4-one (40).*  
Compound **40** was synthesized from 2-thioxothiazolidin-4-one and [1,1'-biphenyl]-4-carbaldehyde exactly as described for compound **20** and isolated as a dark orange solid in 58.9% yield. <sup>1</sup>H NMR (600 MHz, D<sub>6</sub>-DMSO/TMS) δ 12.31–12.20 (m, 1H, H-4), 7.88 (d, J = 8.2 Hz, 2H, H-14, H-18), 7.74 (dd, J = 7.9, 18.0 Hz, 4H, H-11, H-9, H-8, H-12), 7.68 (s, 1H, H-6), 7.50 (dd, J = 6.9, 8.2 Hz, 2H, H-17, H-15),

7.42 ppm (t,  $J = 7.3$  Hz, 1H, H-16).  $^{13}\text{C}$  NMR (600 MHz,  $\text{D}_6\text{-DMSO/TMS}$ )  $\delta$  125.71 ( $\text{C-CH}$ ); 127.22 ( $\text{C-CH}$ ); 127.93 ( $\text{C-CH}$ ); 128.81 ( $\text{C-CH}$ ); 129.59 ( $\text{C-CH}$ ); 131.62 ( $\text{C-CH}$ ); 132.34 ( $\text{C-CH}$ ); 139.11 ( $\text{C-CH}$ ); 142.54 ( $\text{C-CH}$ ); 169.93 ( $\text{CO}$ ); 196.00 ( $\text{CS}$ ). UPLC retention time 7.85 min. MS calculated, 298.3900, found, 297.9619.

*Synthesis of (Z)-2-thioxo-5-(2-(trifluoromethyl)benzylidene)thiazolidin-4-one (41).*

Compound **41** was synthesized from 2-thioxothiazolidin-4-one and 2-(trifluoromethyl)benzaldehyde exactly as described for compound **20** and isolated as a an off-white solid in 60.7% yield.  $^1\text{H}$  NMR (600 MHz,  $\text{D}_6\text{-DMSO/TMS}$ )  $\delta$  12.41 (s, 1H, H-15), 7.92–7.81 (m, 3H, H-5, H-3, H-2), 7.76–7.69 ppm (m, 2H, H-6, H-4).  $^{13}\text{C}$  NMR (600 MHz,  $\text{D}_6\text{-DMSO/TMS}$ )  $\delta$  123.39 ( $\text{C-CH}$ ); 125.21 ( $\text{C-CH}$ ); 125.90 ( $\text{C-CH}$ ); 127.02 ( $\text{C-CH}$ ); 127.29 ( $\text{C-CH}$ ); 127.33 ( $\text{C-CH}$ ); 127.37 ( $\text{C-CH}$ ); 128.03 ( $\text{CF}_3$ ); 128.23 ( $\text{CF}_3$ ); 128.42 ( $\text{CF}_3$ ); 128.62 ( $\text{CF}_3$ ); 129.77 ( $\text{C-CH}$ ); 131.04 ( $\text{C-CH}$ ); 131.35 ( $\text{C-CH}$ ); 131.67 ( $\text{C-CH}$ ); 133.96 ( $\text{C-CH}$ ); 169.27 ( $\text{CO}$ ); 196.06 ( $\text{CS}$ ). UPLC retention time 6.68 min. MS calculated, 287.98429, found, 288.0781.

*Synthesis of (Z)-2-thioxo-5-(2-(trifluoromethoxy)benzylidene)thiazolidin-4-one (42).*

Compound **42** was synthesized from 3-methyl-2-thioxothiazolidin-4-one and 4'-methoxy-[1,1'-biphenyl]-4-carbaldehyde exactly as described for compound **20** and isolated as a an off-white solid in 70.6% yield.  $^1\text{H}$  NMR (600 MHz,  $\text{D}_6\text{-DMSO/TMS}$ )  $\delta$  12.40 (s, 1H, H-14), 7.76 (s, 1H, H-6), 7.70–7.59 (m, 3H, H-10, H-11, H-12), 7.53 ppm (d,  $J = 8.3$  Hz, 1H, H-9).  $^{13}\text{C}$  NMR (600 MHz,  $\text{D}_6\text{-DMSO/TMS}$ )  $\delta$  122.29 ( $\text{C-CH}$ ); 123.06 ( $\text{C-CH}$ ); 126.62 ( $\text{C-CH}$ ); 128.96 ( $\text{C-CH}$ ); 129.83 ( $\text{C-CH}$ ); 129.88 ( $\text{C-CH}$ ); 132.94 ( $\text{C-CH}$ ); 147.50 ( $\text{C-CH}$ ); 169.56 ( $\text{CO}$ ); 195.80 ( $\text{CS}$ ). UPLC retention time 6.93 min. MS calculated, 304.2892, measured 304.0848.

*Synthesis of (Z)-3-methyl-5-((4'-methyl-[1,1'-biphenyl]-4-yl)methylene)-2-thioxothiazolidin-4-one (43).*

Compound **43** was synthesized from 4'-methyl-[1,1'-biphenyl]-4-carbaldehyde exactly as described for compound **24** and isolated as a yellow solid in 30.1% yield.  $^1\text{H}$  NMR (600 MHz,  $\text{D}_6\text{-acetone}$ ):  $\delta$  7.88–7.85 (m, 2H, H-11, H-15), 7.80 (s, 1H, H-9), 7.72 (d,  $J = 8.2$  Hz, 2H, H-14, H-12), 7.66–7.64 (m, 2H, H-21, H-17), 7.32 (d,  $J = 8.0$  Hz, 2H, H-20, H-18), 3.49 (s, 3H, H-8), 2.38 ppm (s, 3H, H-22).  $^{13}\text{C}$  NMR (600 MHz,  $\text{D}_6\text{-DMSO/TMS}$ )  $\delta$  21.20 ( $\text{CH}_3$ ); 31.68 ( $\text{CH}_3$ ); 127.15 ( $\text{C-CH}$ ); 127.43 ( $\text{C-CH}$ ); 130.21 ( $\text{C-CH}$ ); 131.84 ( $\text{C-CH}$ ); 132.22 ( $\text{C-CH}$ ); 132.87 ( $\text{C-CH}$ ); 138.42 ( $\text{C-CH}$ ). UPLC retention time 9.49min. MS calculated, 326.4440, measured 326.0348.

*Synthesis of (Z)-2-(5-((4'-methyl-[1,1'-biphenyl]-4-yl)methylene)-4-oxo-2-thioxothiazolidin-3-yl)acetic acid (44).*

Compound **44** was synthesized from 4'-methyl-[1,1'-biphenyl]-4-carbaldehyde exactly as described from compound **24** and isolated as a yellow solid.  $^1\text{H}$  NMR (600 MHz,  $\text{D}_6\text{-Acetone}$ ):  $\delta$  7.89–7.85 (m, 3H, H-11, H-15, H-9), 7.75 (d,  $J = 8.2$  Hz, 2H, H-12, H-14), 7.67–7.65 (m, 2H, H-17, H-21), 7.32 (d,  $J = 7.8$  Hz, 2H, H-18, H-20), 4.85 (s, 2H, H-8), 2.38 ppm (s, 3H, H-22).  $^{13}\text{C}$  NMR (600 MHz,  $\text{D}_6\text{-DMSO/TMS}$ )  $\delta$  47.05 ( $\text{CH}_3$ ); 127.14 ( $\text{C-CH}$ ); 127.71 ( $\text{C-CH}$ ); 130.18 ( $\text{C-CH}$ ); 131.85 ( $\text{C-CH}$ ); 132.16 ( $\text{C-CH}$ ); 133.16 ( $\text{C-CH}$ ); 136.26 ( $\text{C-CH}$ ); 138.39 ( $\text{C-CH}$ ); 142.72 ( $\text{C-CH}$ ); 167.09 ( $\text{CO}$ ); 167.59 ( $\text{COOH}$ ); 193.50 ( $\text{CS}$ ). UPLC retention time 8.20 min. MS calculated, 368.4530, measured 368.2621.

*Synthesis of (Z)-5-((4'-methoxy-[1,1'-biphenyl]-4-yl)methylene)-2-thioxothiazolidin-4-one (45).*

Compound **45** was synthesized from 4'-methoxy-[1,1'-biphenyl]-4-carbaldehyde exactly as described from compound **24** and isolated as an orange solid.  $^1\text{H}$  NMR (600 MHz,  $\text{D}_6\text{-DMSO}$ ):  $\delta$  7.81 (d,  $J = 8.2$  Hz, 2H), 7.73–7.63 (m, 5H), 7.05 (d,  $J = 8.6$  Hz, 2H), 3.80 ppm (s, 3H, H-22).  $^{13}\text{C}$  NMR (600 MHz,  $\text{D}_6\text{-DMSO/TMS}$ )  $\delta$  55.72 ( $\text{O-CH}_3$ ); 115.05 ( $\text{C-CH}$ ); 127.30 ( $\text{C-CH}$ ); 128.49 ( $\text{C-CH}$ ); 131.18 ( $\text{C-CH}$ ); 131.47 ( $\text{C-CH}$ ); 131.60 ( $\text{C-CH}$ ); 131.88 ( $\text{C-CH}$ ); 142.10 ( $\text{C-CH}$ ); 160.09 ( $\text{CO}$ ). UPLC retention time 7.69min. MS calculated, 328.03877, measured 328.0452.

*Synthesis of (Z)-5-((4'-(trifluoromethyl)-[1,1'-biphenyl]-4-yl)methylene)-2-thioxothiazolidin-4-one (46).*

Compound **46** was synthesized from 4'-(trifluoromethyl)-[1,1'-biphenyl]-4-carbaldehyde exactly as described from compound **24** and isolated as an off white solid.  $^1\text{H}$  NMR (600 MHz,  $\text{D}_6\text{-DMSO}$ ):  $\delta$  7.94 (dd,  $J = 8.3, 28.4$  Hz, 4H), 7.85–7.82 (m, 3H), 7.74–7.71 ppm (m, 2H).  $^{13}\text{C}$  NMR (600 MHz,  $\text{D}_6\text{-$

DMSO/TMS)  $\delta$  124.57 (C-CH); 126.33 (C-CH); 128.07 (C-CH); 128.26 (C-CH); 131.17 (C-CH); 131.45 (C-CH); 133.55 (C-CH); 140.46 (C-CH); 143.31 (C-CH); 167.76 (CO); 168.17 (CO). UPLC retention time 7.69 min. MS calculated, 349.03843, measured 342.0713.

## Physicochemical Properties

**Table S1. Structures of CD38 Inhibitors and their Activity Against CD38 Cyclase**

| Compound | Structure | MW     | CLogP | tPSA   | pKa*                      |
|----------|-----------|--------|-------|--------|---------------------------|
| 1        |           | 309.42 | 2.871 | 61.14  | 4.7, 4.8, 7.1, 11.4, 11.9 |
| 2        |           | 343.43 | 3.472 | 61.14  | 4.4, 4.6, 7.1, 11.1, 11.3 |
| 3        |           | 309.42 | 2.105 | 61.47  | 4.8, 5.0, 7.0, 7.9, 11.0  |
| 4        |           | 309.42 | 2.901 | 61.14  | 4.6, 5.1, 7.2, 11.4, 11.8 |
| 5        |           | 594.59 | 8.470 | 53.99  | --                        |
| 6        |           | 378.53 | 6.173 | 55.45  | 5.3, 7.1                  |
| 7        |           | 411.50 | 2.062 | 94.14  | 1.9, 2.2, 3.0, 12.1       |
| 8        |           | 290.70 | 2.515 | 63.60  | 5.1                       |
| 9        |           | 302.24 | 0.445 | 127.45 | 6.0, 6.2, 6.3, 6.4, 6.4   |
| 10       |           | 317.34 | 2.851 | 69.89  | 4.0, 4.4, 6.5             |
| 11       |           | 364.66 | 2.767 | 40.54  | 2.0, 6.0                  |
| 12       |           | 333.29 | 3.869 | 55.40  | 7.3                       |
| 13       |           | 333.79 | 3.800 | 72.06  | 8.1, 8.8                  |
| 14       |           | 445.51 | 0.388 | 89.46  | 1.9, 3.2, 12.3            |
| 15       |           | 488.53 | 1.628 | 114.40 | 1.8, 4.1, 13.1            |
| 16       |           | 392.83 | 3.836 | 92.35  | 5.4                       |

|    |                                                                                     |        |       |       |          |
|----|-------------------------------------------------------------------------------------|--------|-------|-------|----------|
| 20 | 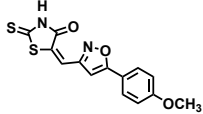   | 318.37 | 1.798 | 59.92 | 6.5      |
| 21 |    | 299.38 | 0.161 | 68.9  | 7.5      |
| 22 |    | 309.25 | 2.83  | 38.33 | 7.5      |
| 23 |    | 289.29 | 2.685 | 29.10 | 7.5      |
| 24 |    | 341.44 | 3.945 | 29.54 | 2.0      |
| 25 |    | 272.34 | 1.689 | 41.46 | 3.8, 6.4 |
| 26 |    | 311.37 | 3.746 | 38.33 | 7.7      |
| 27 |    | 313.39 | 3.9   | 38.33 | 7.7      |
| 28 |    | 279.33 | 1.556 | 47.56 | 7.6      |
| 29 |   | 311.43 | 1.556 | 47.56 | 7.5      |
| 30 |  | 350.79 | 2.197 | 59.92 | 1.6, 6.2 |
| 31 |  | 309.40 | 3.735 | 29.1  | 7.8      |
| 32 |  | 365.39 | 4.573 | 29.1  | 7.7      |
| 33 |  | 311.42 | 4.189 | 29.1  | 7.7      |
| 34 |  | 298.38 | 2.403 | 41.46 | 4.3, 7.6 |
| 35 |  | 355.35 | 3.959 | 38.33 | 7.3      |
| 36 |  | 301.38 | 2.895 | 38.33 | 7.5      |
| 37 |  | 295.36 | 4.099 | 46.17 | 7.5      |
| 38 |  | 327.42 | 3.489 | 38.33 | 7.7      |

|    |                                                                                   |        |       |       |          |
|----|-----------------------------------------------------------------------------------|--------|-------|-------|----------|
| 39 | 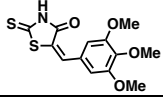 | 311.37 | 0.859 | 56.79 | 7.3      |
| 40 |  | 297.39 | 3.69  | 29.1  | 7.7      |
| 41 |  | 289.29 | 2.685 | 29.1  | 7.5      |
| 42 |  | 305.29 | 2.83  | 38.33 | 7.3      |
| 43 |  | 325.44 | 4.525 | 20.31 | 2.0      |
| 44 |  | 369.45 | 3.815 | 57.61 | 1.8, 3.7 |
| 45 |  | 327.42 | 3.609 | 38.33 | 7.7      |
| 46 |  | 349.33 | 4.483 | 46.17 | 7.5      |

cLogP and tPSA values are estimated using ChemDraw 20.0; pKa values were estimated using the MolGpKa software routine: <https://xundrug.cn/molgpka> (J. Chem. Inf. Modeling **2021**, 67 (7), 3159-3165).

## Enzyme Assay

**CD38 cyclase activity.** Compounds were screened for the ability to inhibit the cyclase activity of recombinant human CD38 in a fluorometric assay. In brief, recombinant CD38 was diluted to a working concentration of 40 nM (4x) in assay diluent (PBS, 0.002% Tween-20, pH7.4) and 25  $\mu$ L were pipetted into a black 96 well plate. Screening compounds were diluted using assay diluent to 4x the desired screening concentration and 25  $\mu$ L of this mixture was added to each wells. DMSO was screened as a vehicle control. After 15 mins incubation on an orbital shaker, 50  $\mu$ L of a 50  $\mu$ M solution of NGD<sup>+</sup> (2x) was added to each well, initiating the reaction. The final concentration of CD38 and NGD<sup>+</sup> in the reaction are, 10 nM and 25  $\mu$ M respectively. With an excitation at 300nm and 410nm emission, the reaction was monitored for 10 mins. Initial rates (velocities) were calculated by determining the slope over the first 5 mins. Mean fluorescence for the vehicle treated control was used to normalize each treatment group, and values were expressed as percent activity of CD38. Each assay was conducted in at least technical duplicates and experimental triplicates and compared to the literature described CD38 cyclase inhibitor quercetin (Q).

**CD38 hydrolase activity.** The hydrolase screening assay was conducted using the same procedure as the cyclase screen, substituting 20 $\mu$ M  $\epsilon$ -NAD<sup>+</sup> working solution for NGD<sup>+</sup>, resulting in a final concentration of 10 $\mu$ M. Initial rates were calculated for the first 2.5mins.

**Dose dependence and kinetic mechanism of inhibition.** Selected hit compounds were assayed for dose dependent inhibition of CD38 cyclase using the general workflow described above at concentrations between 0 and 100  $\mu$ M. Serial dilutions of each compound were adjusted to establish an eight-point concentration curve. Likewise, Michaelis-Menton enzyme kinetics were assessed by varying substrate (8-point curve) and compound concentrations. All enzyme reactions were kept at a standard ratio of CD38/compound/substrate (4x/4x/2x). Data from each experiment was collected in technical and experimental triplicates.

## Cell Culture

*Primary culture.* All PBMC and T cells were cultured in accordance with the [Stem Cell Technology](#) T-cell Expansion Protocol. In brief, for expansion of T cells in PBMC cultures, an initial culture was seeded at  $1 \times 10^6$  cells/mL in ImmunoCult XF expansion media with 3-10 ng/mL of IL-2 (complete media). The culture was diluted 4- to 8-fold every 2 to 3 days with complete media.

*T cell activation.* PBMCs were cultured as above with the addition of 20  $\mu$ L/mL of anti-CD3/CD38 tetramer on day 0. Activated T cell cultures were maintained for 14 days on average. For re-stimulation challenges, 20  $\mu$ L/mL of anti-CD3/CD28 was added to activated T cells (day 9-12).

*PBMC toxicity.* Cytotoxicity of CD38 hit inhibitors were assessed against T cell activated PBMCs. After a 48 hr treatment, cell viability was assessed using CellTiter-Glo ([Promega](#)), with all experiments performed according to the manufacturers directions. Viability was assessed in three separate donors. Experiments were conducted in triplicates and mean values normalized to vehicle treated controls.

*Cytokine Analysis (Interferon- $\gamma$ ).* T cells were activated and cultured as described above for 12 days. Secreted cytokines were measured in the supernatants from T cells by ELISA ([Biolegend](#)). For acute T cell activity and screening of CD38 inhibitors, supernatants were analyzed 48 hrs post-activation. Supernatants were also collected on day 14, 48 hrs after restimulation of T cell cultures to assess effects of CD38 inhibitors in a re-challenge/expansion model. Initial interferon- $\gamma$  screens were conducted with a single donor in triplicate and results recorded as percent difference from vehicle treated control. Screening of novel CD38 inhibitors was conducted with three donors and presented as mean percent difference from vehicle treated control.

*Cellular NADH levels.* Cellular NADH levels were measured using the NAD-Glo kit ([Promega](#))— with all experiments performed according to the manufacturers directions. In short, NADH was measured in resting PBMCs, and PBMCs 30 and 60 mins after activation.



CMM210212 TZB-001

Consistency: Unknown\*, unknown  
purity\*

Data set 1H: CMM210212 1 1 /opt/topspin4.1.3  
Structure: /opt/topspin4.1.3/CMM210212/1/structure.mol  
Acquisition date: February 12, 2021 9:08:39 AM EST  
Solvent: DMSO  
Probe: 5 mm PATXI 1H/D/19F-13C/15N Z-GRD Z855801/0017  
Eretic reference:

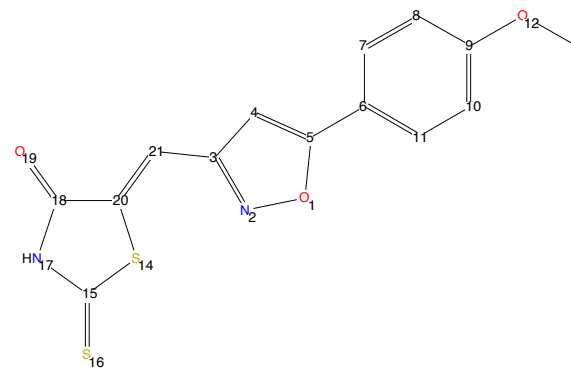

Sum formula:  
C<sub>14</sub>H<sub>10</sub>N<sub>2</sub>O<sub>3</sub>S<sub>2</sub>

Molecular Mass:  
318.01 Da

Comments:  
Multiplet interpretation available for spectrum.  
A multiplet interpretation for all major signals in the spectrum could be found. All given impurities could be assigned to regions in the spectrum.

Signature:

Automatic analysis generated by Bruker CMC (b:17).  
One or more results have not been created by automatic analysis, or edited manually: marked by '\*'.  
Report generated by Bruker CMC-assist TopSpin 4.1.3 (of 2021-06-28 13:00:50), on 'MacBook-Pro.local' as 'tzbenton'

## Compound 20

7.83 [7, 11]\*  
7.49 [21]\*  
7.22 [4]\*  
7.10 [10, 8]\*

3.31 [H<sub>2</sub>O]  
2.50 [DMSO]  
1.91 [s, 2H]

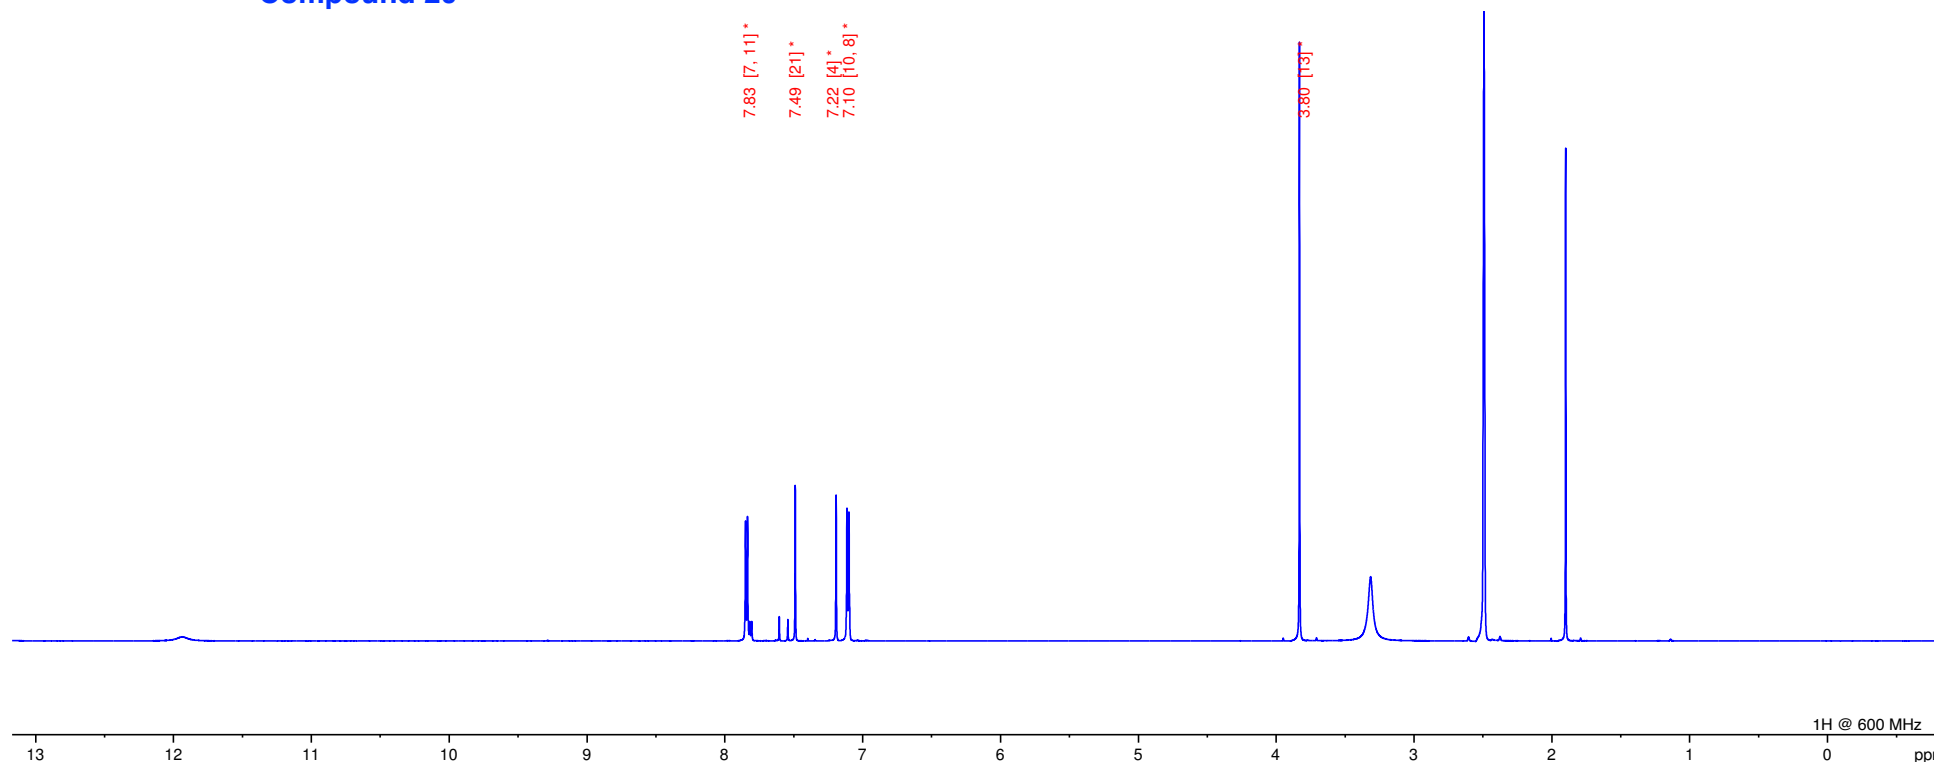

1H @ 600 MHz  
ppm

103dx-001

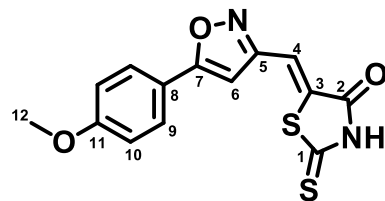

Compound 20

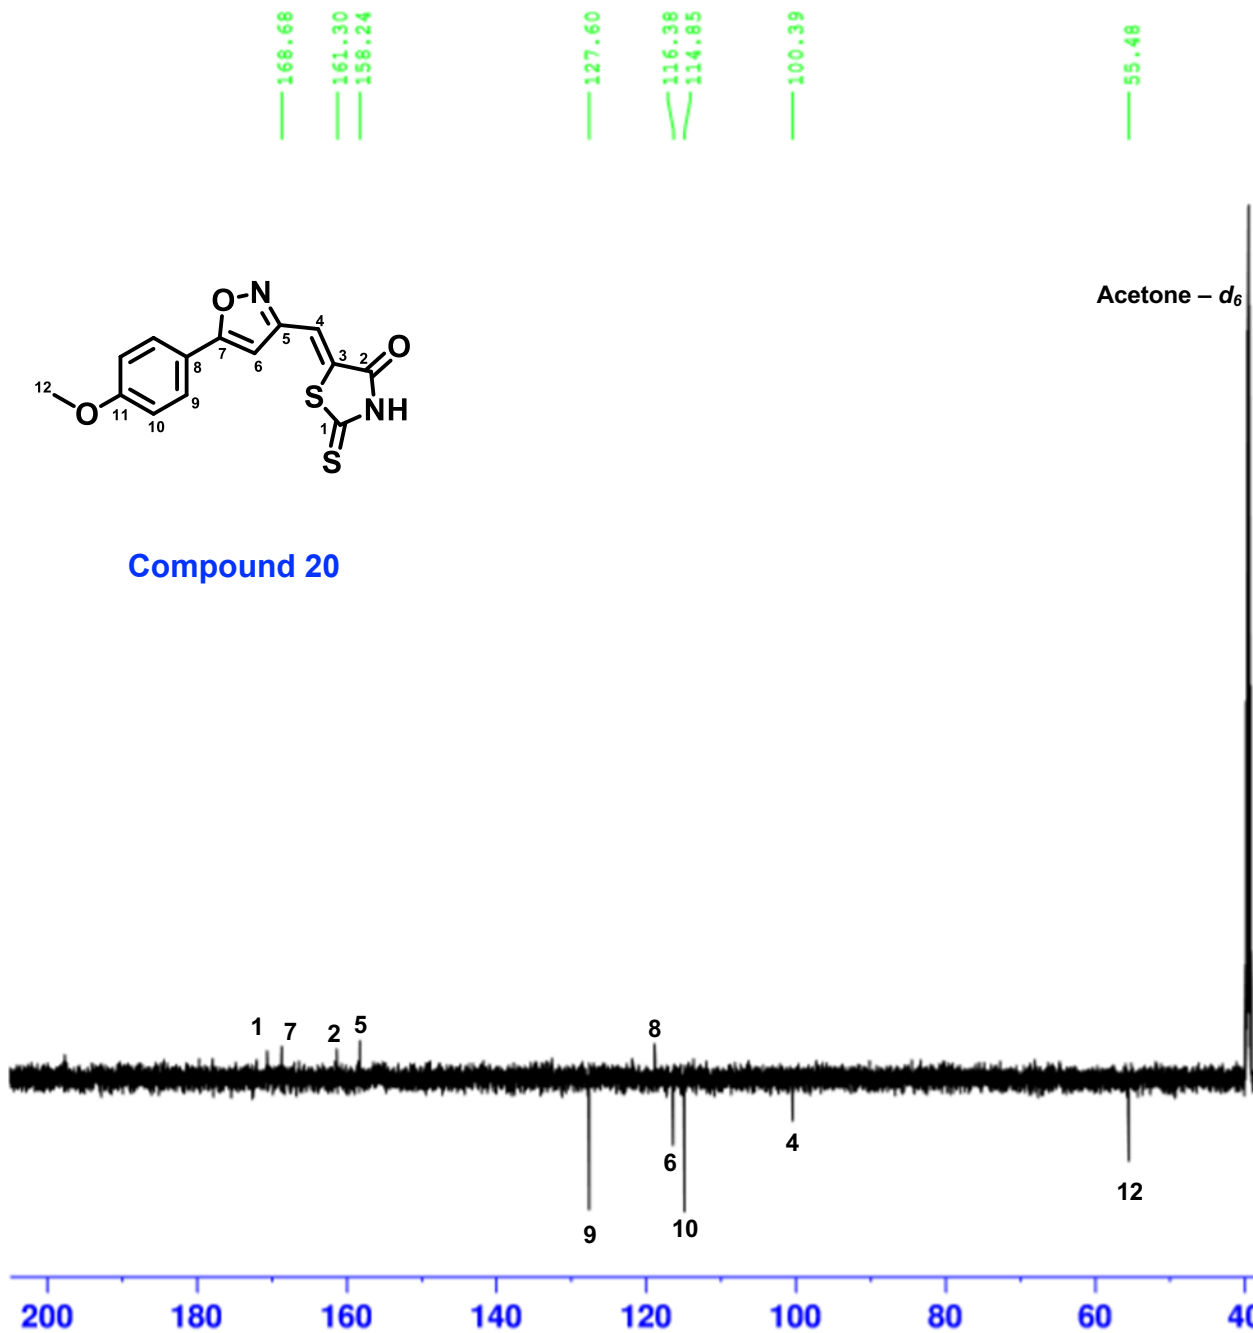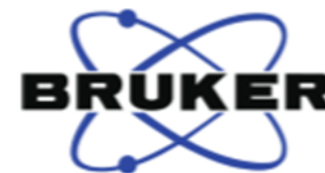

Current Data Parameters  
NAME CMM210913  
EXPNO 3  
PROCNO 1

F2 - Acquisition Parameters  
Date\_ 20210913  
Time 14.10  
INSTRUM spect  
PROBHD 5 mm PATXI 1H/  
PULPROG jmod  
TD 65536  
SOLVENT Acetone  
NS 2000  
DS 4  
SWH 36057.691 Hz  
FIDRES 0.550197 Hz  
AQ 0.9087659 sec  
RG 2050  
DW 13.867 usec  
DE 6.50 usec  
TE 301.5 K  
CNST2 145.000000  
CNST11 1.000000  
D1 2.00000000 sec  
D20 0.00689655 sec  
TD0 1

===== CHANNEL f1 =====  
SFO1 150.9178988 MHz  
NUC1 13C  
P1 11.80 usec  
P2 23.60 usec  
PLW1 202.10000610 W

===== CHANNEL f2 =====  
SFO2 600.1324005 MHz  
NUC2 1H  
CPDPRG[2] waltz16  
PCPD2 70.00 usec  
PLW2 13.69999981 W  
PLW12 0.17449000 W

F2 - Processing parameters  
SI 32768  
SF 150.9028090 MHz  
WDW EM  
SSB 0  
LB 1.00 Hz  
GB 0  
PC 1.40

# SAMPLE INFORMATION

|                   |                          |                     |                                 |
|-------------------|--------------------------|---------------------|---------------------------------|
| Sample Name:      | 2021Feb05_TZB103dx_001   | Acquired By:        | System                          |
| Sample Type:      | Unknown                  | Sample Set Name     | TZB_103dx                       |
| Vial:             | 1:C,1                    | Acq. Method Set:    | ReversePhase_12min_Max Plot     |
| Injection #:      | 1                        | Processing Method:  | ReversePhase_Purity_MAX Plot    |
| Injection Volume: | 1.00 ul                  | Channel Name:       | PDA Max Plot 190.0 - 800.0      |
| Run Time:         | 12.0 Minutes             | Proc. Chnl. Descr.: | PDA MaxPlot (190.0 nm to 800.0) |
|                   |                          |                     |                                 |
| Date Acquired:    | 2/5/2021 3:00:30 PM EST  |                     |                                 |
| Date Processed:   | 8/31/2021 3:48:20 PM EDT |                     |                                 |

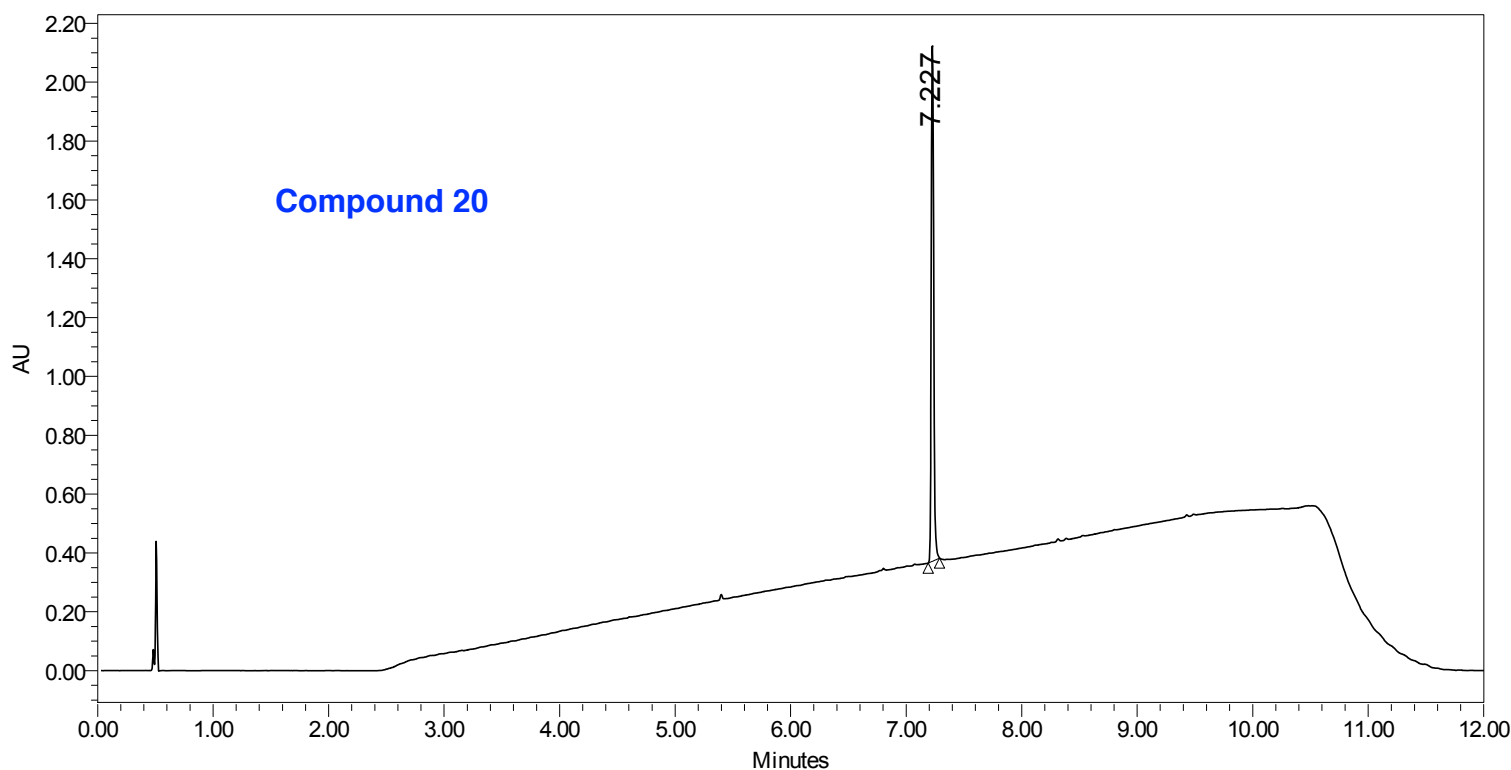

|   | RT    | Area    | % Area | Height  | Peak<br>Lambda Max. |
|---|-------|---------|--------|---------|---------------------|
| 1 | 7.227 | 2581126 | 100.00 | 1751520 | 358.9               |

CMM210212 TZB-002

Consistency: Unknown\*, unknown  
purity\*

Data set 1H: CMM210212 5 1 /opt/topspin4.1.3  
Structure: /opt/topspin4.1.3/CMM210212/5/structure.mol  
Acquisition date: February 12, 2021 9:26:26 AM EST  
Solvent: DMSO  
Probe: 5 mm PATXI 1H/D/19F-13C/15N Z-GRD Z855801/0017  
Eretic reference:

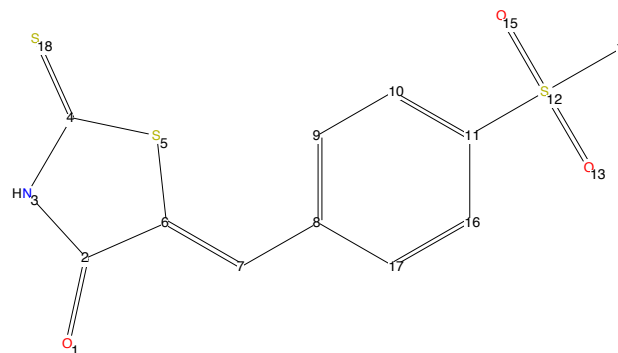

Sum formula:  
C<sub>11</sub>H<sub>8</sub>NO<sub>3</sub>S<sub>3</sub>

Molecular Mass:  
298.97 Da

**Comments:**  
Multiplet interpretation available for spectrum.  
A multiplet interpretation for all major signals in the spectrum could be found. All given impurities could be assigned to regions in the spectrum.

**Signature:**

Automatic analysis generated by Bruker CMC (b:17).  
One or more results have not been created by automatic analysis, or edited manually: marked by '\*'.  
Report generated by Bruker CMC-assist TopSpin 4.1.3 (of 2021-06-28 13:00:50), on 'MacBook-Pro.local' as 'tzbenton'

## Compound 21

8.05 [17, 9] \*  
7.85 [10, 16] \*  
7.73 [7] \*

H<sub>2</sub>O  
3.33 [4, 4] \*

2.50 [DMSO]

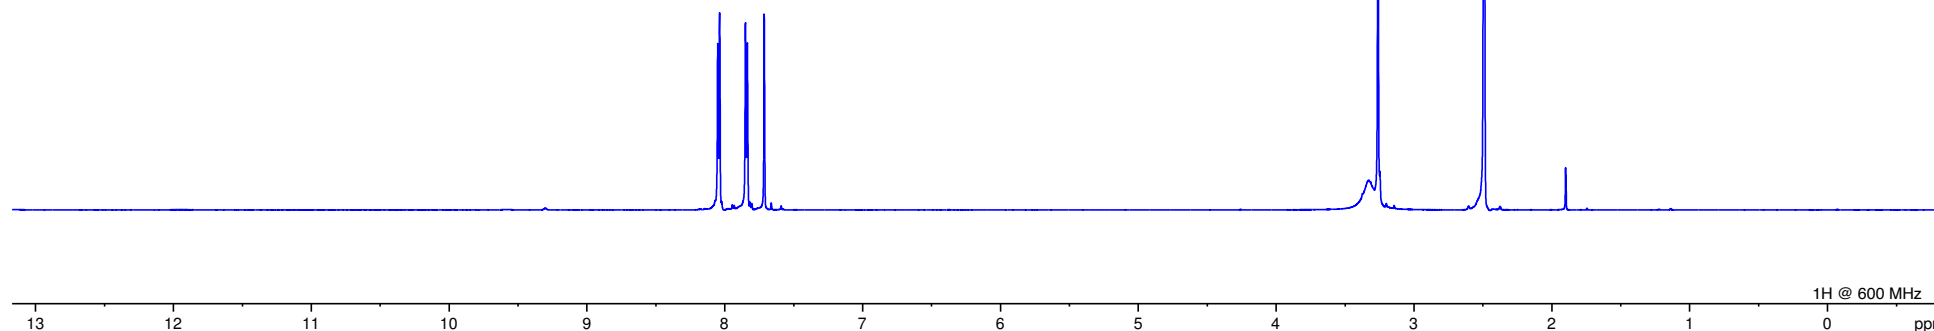

21 (TZB103dx-002)

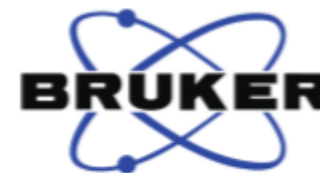

Current Data Parameters  
 NAME CMM210917  
 EXPNO 1  
 PROCNO 1

F2 - Acquisition Parameters  
 Date\_ 20210917  
 Time 8.38  
 INSTRUM spect  
 PROBHD 5 mm PATXI 1H/  
 PULPROG jmod  
 TD 65536  
 SOLVENT DMSO  
 NS 1000  
 DS 4  
 SWH 36057.691 Hz  
 FIDRES 0.550197 Hz  
 AQ 0.9087659 sec  
 RG 2050  
 DW 13.867 usec  
 DE 6.50 usec  
 TE 301.4 K  
 CNST2 145.0000000  
 CNST11 1.0000000  
 D1 2.00000000 sec  
 D20 0.00689655 sec  
 TD0 1

===== CHANNEL f1 =====  
 SFO1 150.9178988 MHz  
 NUC1 13C  
 P1 11.80 usec  
 P2 23.60 usec  
 PLW1 202.10000610 W

===== CHANNEL f2 =====  
 SFO2 600.1324005 MHz  
 NUC2 1H  
 CPDPRG[2] waltz16  
 PCPD2 70.00 usec  
 PLW2 13.69999981 W  
 PLW12 0.17449000 W

F2 - Processing parameters  
 SI 32768  
 SF 150.9028090 MHz  
 WDW EM  
 SSB 0  
 LB 1.00 Hz  
 GB 0  
 PC 1.40

Compound 21

Dimethyl sulfoxide - d<sub>6</sub>

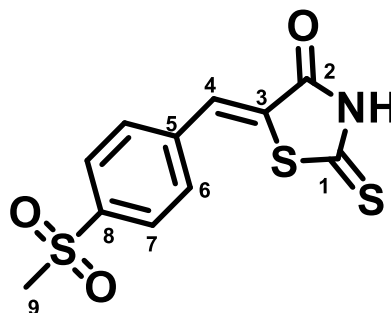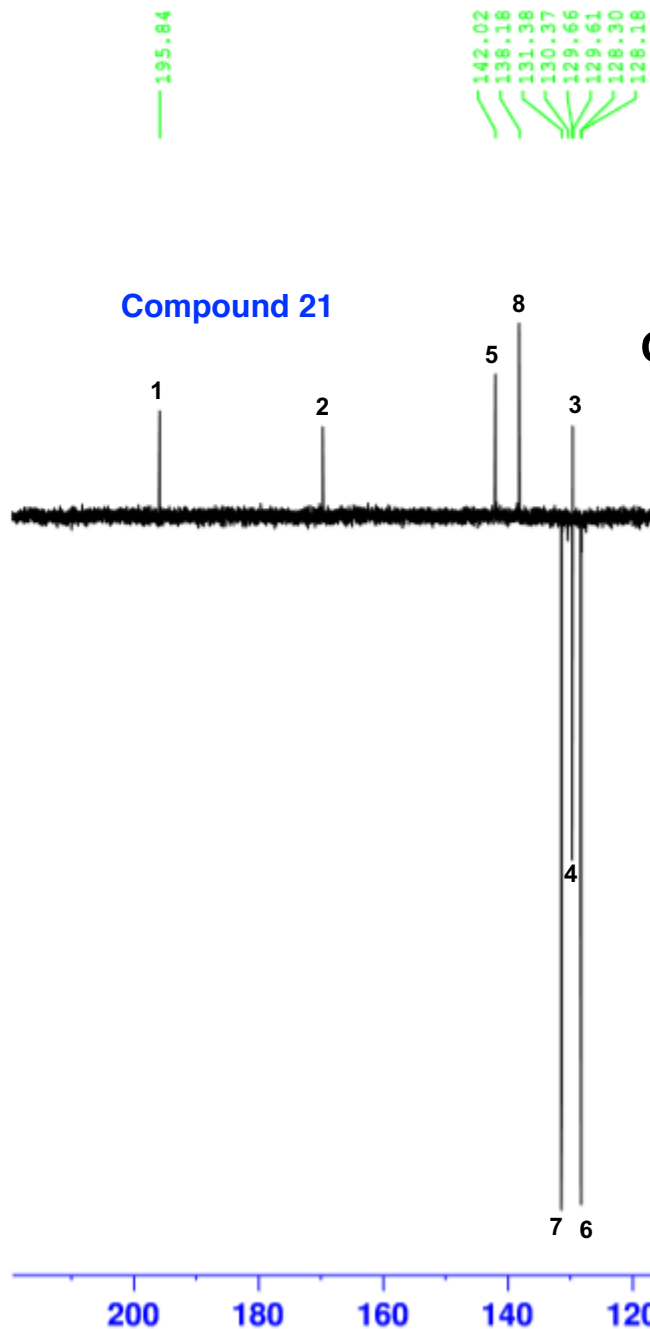

# SAMPLE INFORMATION

|                   |                         |                     |                                 |
|-------------------|-------------------------|---------------------|---------------------------------|
| Sample Name:      | 2021Feb08_TZB103dx_004  | Acquired By:        | System                          |
| Sample Type:      | Unknown                 | Sample Set Name     | TZB_103dx                       |
| Vial:             | 1:F,6                   | Acq. Method Set:    | ReversePhase_12min_Max Plot     |
| Injection #:      | 1                       | Processing Method:  | ReversePhase_Purity_MAX Plot    |
| Injection Volume: | 1.00 ul                 | Channel Name:       | PDA Max Plot 190.0 - 800.0      |
| Run Time:         | 12.0 Minutes            | Proc. Chnl. Descr.: | PDA MaxPlot (190.0 nm to 800.0) |
|                   |                         |                     |                                 |
| Date Acquired:    | 2/8/2021 3:10:01 PM EST |                     |                                 |
| Date Processed:   | 2/8/2021 4:03:43 PM EST |                     |                                 |

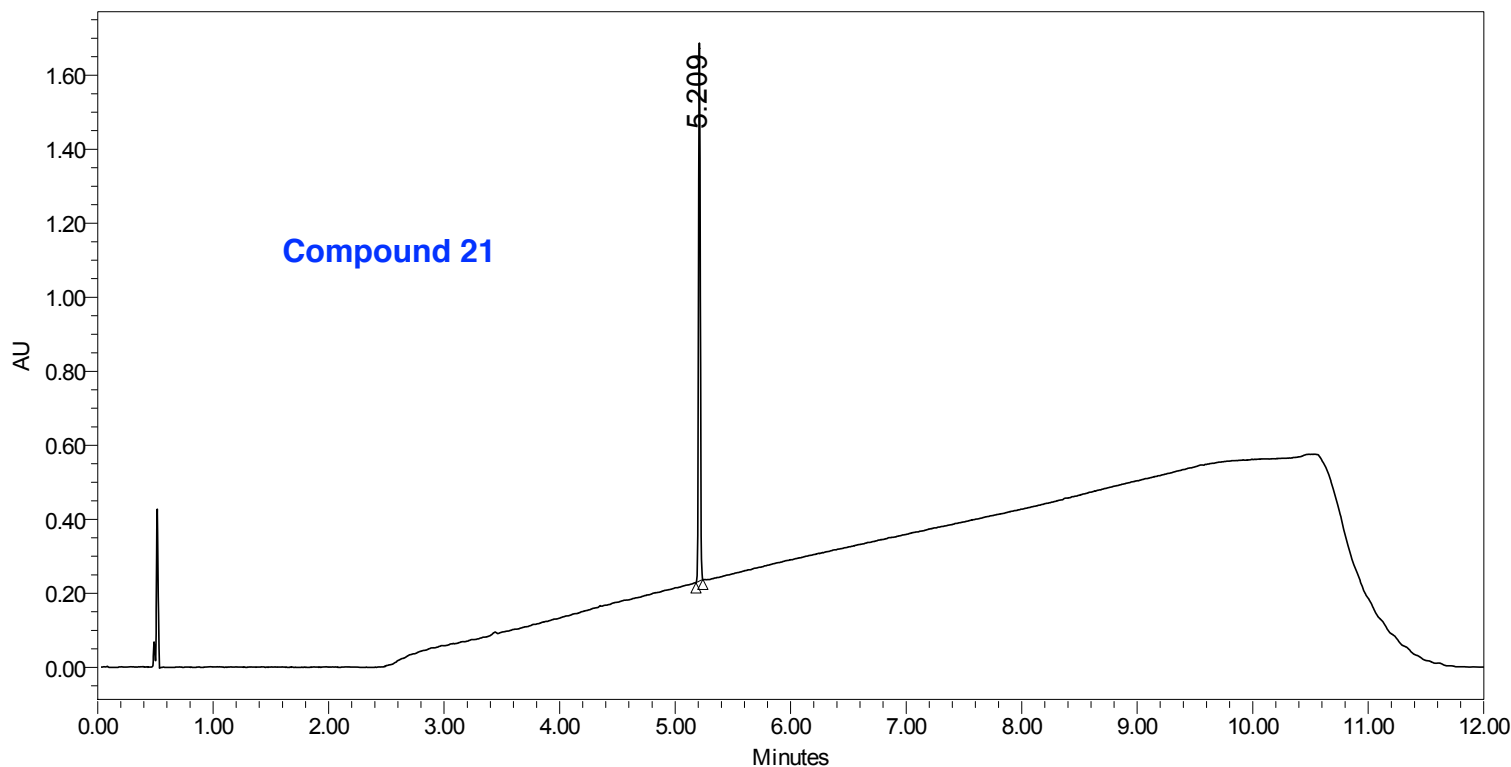

|   | RT    | Area    | % Area | Height  | Peak<br>Lambda Max. |
|---|-------|---------|--------|---------|---------------------|
| 1 | 5.209 | 1617665 | 100.00 | 1457785 | 373.8               |



CMM210212 TZB-004

Consistency: Unknown\*, unknown  
purity\*

Data set 1H: CMM210212 6 1 /opt/topspin4.1.3  
Structure: /opt/topspin4.1.3/CMM210212/6/structure.mol  
Acquisition date: February 12, 2021 9:30:28 AM EST  
Solvent: DMSO  
Probe: 5 mm PATXI 1H/D/19F-13C/15N Z-GRD Z855801/0017  
Eretic reference:

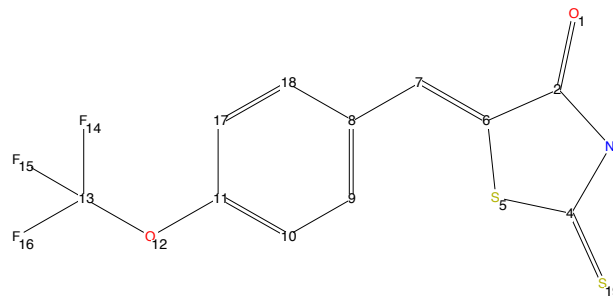

Sum formula:  
C<sub>11</sub>H<sub>6</sub>F<sub>3</sub>NO<sub>2</sub>S<sub>2</sub>

Molecular Mass:  
304.98 Da

Comments:  
Multiplet interpretation available for spectrum.  
A multiplet interpretation for all major signals in the spectrum could be found. All given impurities could be assigned to regions in the spectrum.

Signature:

Automatic analysis generated by Bruker CMC (b:17).  
One or more results have not been created by automatic analysis, or edited manually: marked by '\*'.  
Report generated by Bruker CMC-assist TopSpin 4.1.3 (of 2021-06-28 13:00:50), on 'MacBook-Pro.local' as 'tzbenton'

## Compound 22

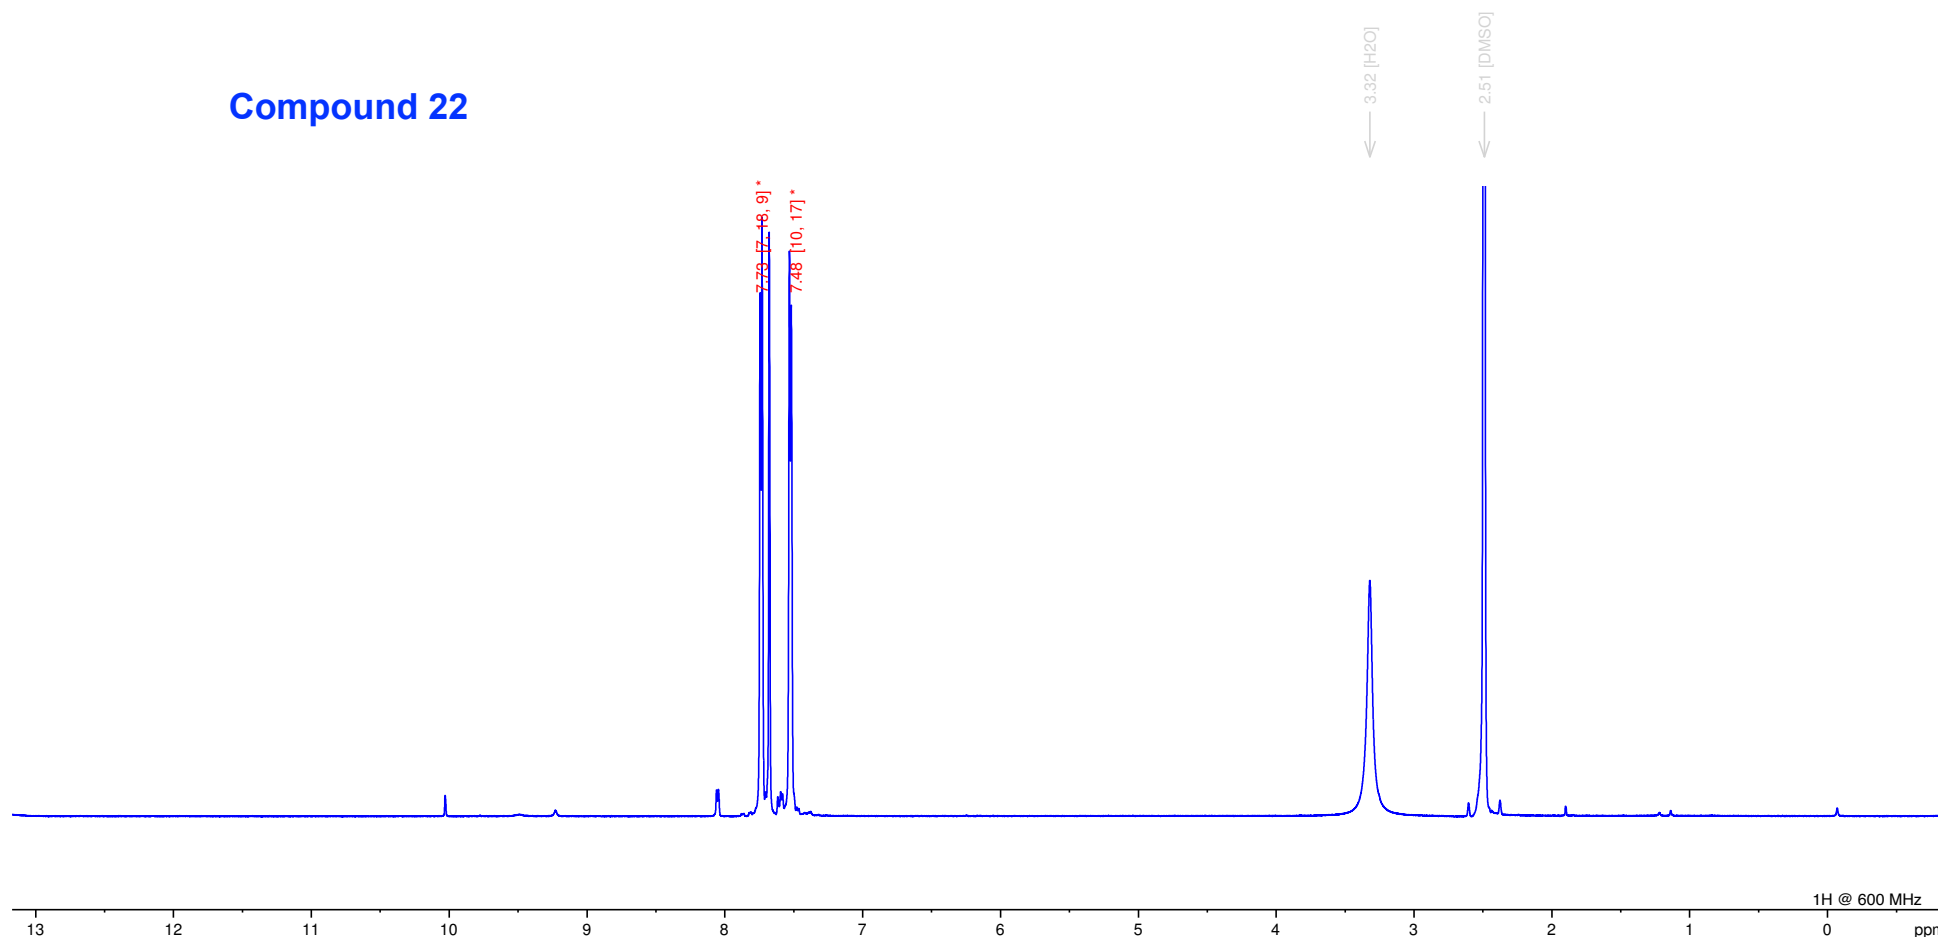

22 (TZB103dx-004)

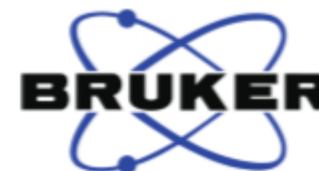

Current Data Parameters  
 NAME CMM210917  
 EXPNO 2  
 PROCNO 1

F2 - Acquisition Parameters  
 Date\_ 20210917  
 Time 9.34  
 INSTRUM spect  
 PROBHD 5 mm PATXI 1H/  
 PULPROG jmod  
 TD 65536  
 SOLVENT DMSO  
 NS 1000  
 DS 4  
 SWH 36057.691 Hz  
 FIDRES 0.550197 Hz  
 AQ 0.9087659 sec  
 RG 2050  
 DW 13.867 usec  
 DE 6.50 usec  
 TE 301.3 K  
 CNST2 145.0000000  
 CNST11 1.0000000  
 D1 2.0000000 sec  
 D20 0.00689655 sec  
 TD0 1

===== CHANNEL f1 =====  
 SFO1 150.9178988 MHz  
 NUC1 13C  
 P1 11.80 usec  
 P2 23.60 usec  
 PLW1 202.10000610 W

===== CHANNEL f2 =====  
 SFO2 600.1324005 MHz  
 NUC2 1H  
 CPDPRG[2] waltz16  
 PCPD2 70.00 usec  
 PLW2 13.69999981 W  
 PLW12 0.17449000 W

F2 - Processing parameters  
 SI 32768  
 SF 150.9028090 MHz  
 WDW EM  
 SSB 0  
 LB 1.00 Hz  
 GB 0  
 PC 1.40

Compound 22

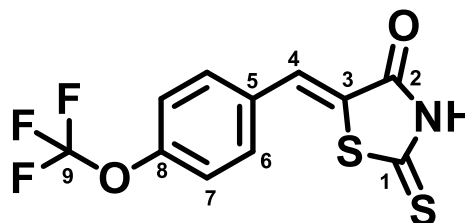

Dimethyl sulfoxide - d<sub>6</sub>

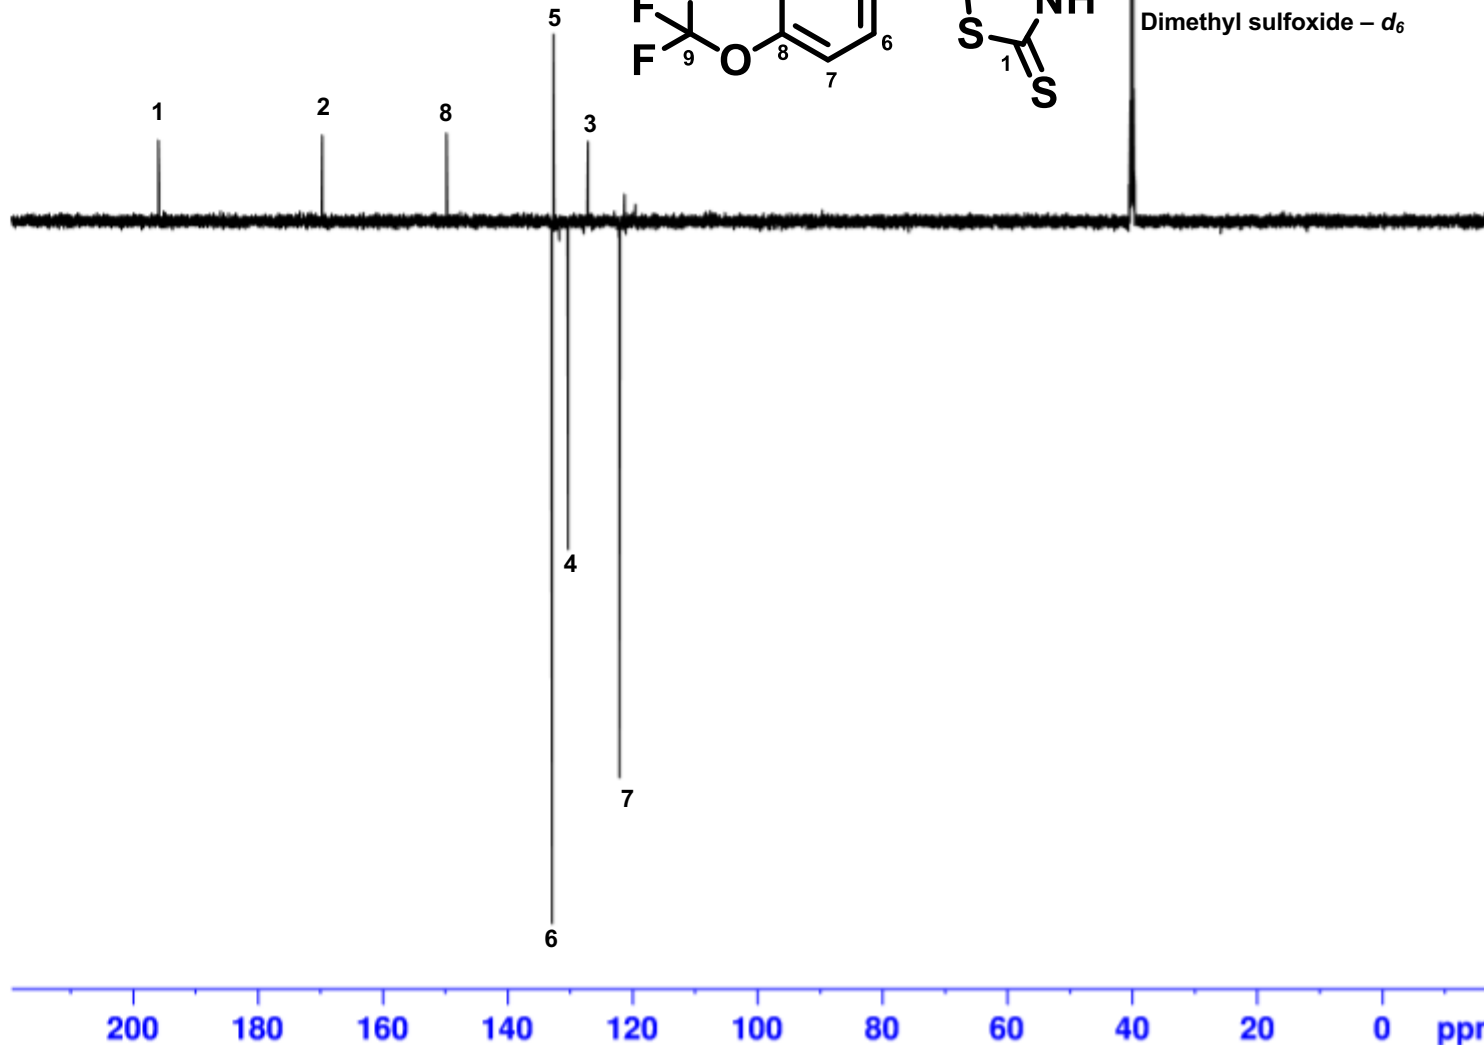

195.89

169.71

149.76

132.90

132.63

131.73

130.32

127.16

122.07

# SAMPLE INFORMATION

|                   |                          |                     |                                 |
|-------------------|--------------------------|---------------------|---------------------------------|
| Sample Name:      | 2021Feb08_TZB103dx_004   | Acquired By:        | System                          |
| Sample Type:      | Unknown                  | Sample Set Name     | TZB_103dx                       |
| Vial:             | 1:F,4                    | Acq. Method Set:    | ReversePhase_12min_Max Plot     |
| Injection #:      | 1                        | Processing Method:  | ReversePhase_Purity_MAX Plot    |
| Injection Volume: | 1.00 ul                  | Channel Name:       | PDA Max Plot 190.0 - 800.0      |
| Run Time:         | 12.0 Minutes             | Proc. Chnl. Descr.: | PDA MaxPlot (190.0 nm to 800.0) |
|                   |                          |                     |                                 |
| Date Acquired:    | 2/8/2021 2:44:46 PM EST  |                     |                                 |
| Date Processed:   | 8/31/2021 3:51:55 PM EDT |                     |                                 |

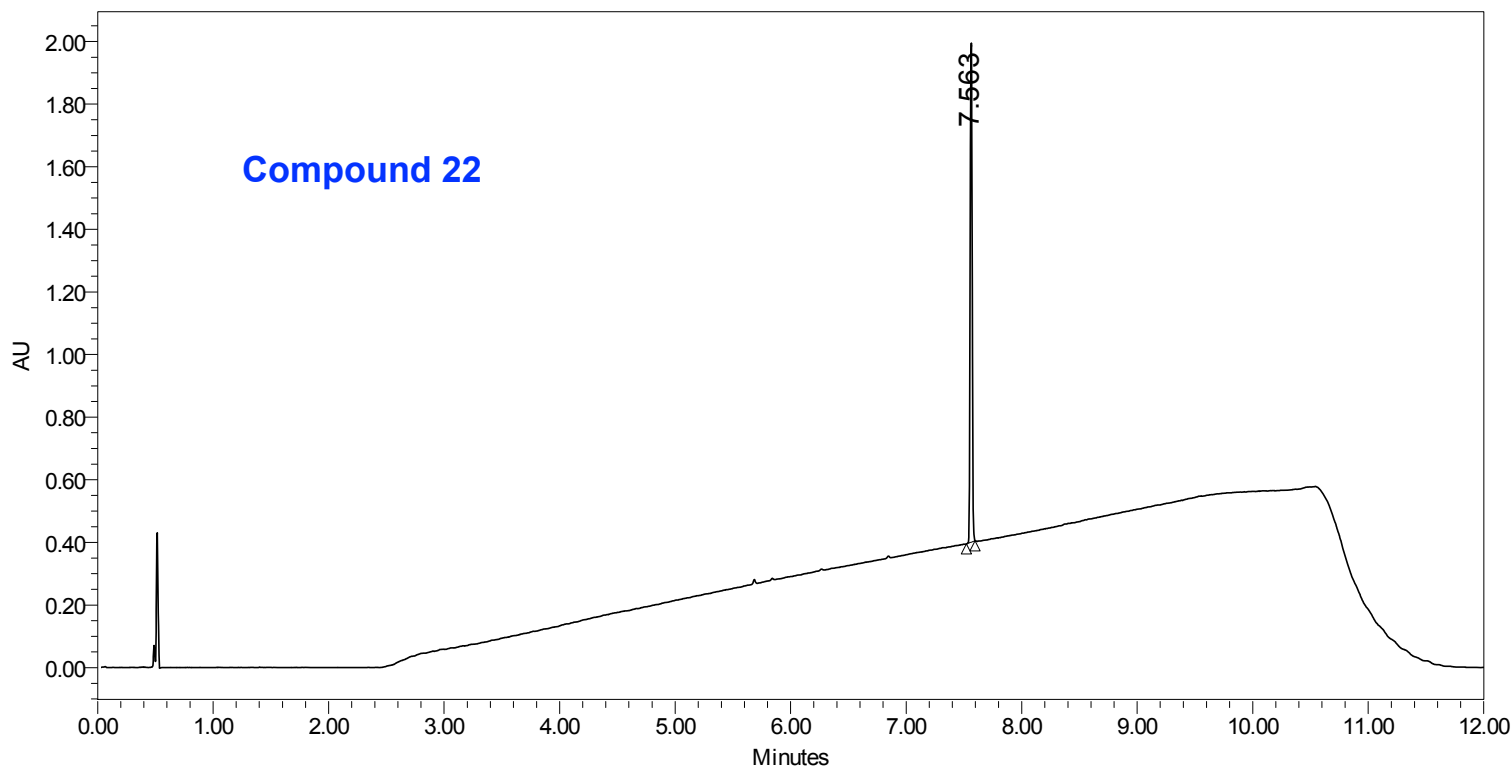

|   | RT    | Area    | % Area | Height  | Peak<br>Lambda Max. |
|---|-------|---------|--------|---------|---------------------|
| 1 | 7.563 | 1952785 | 100.00 | 1596133 | 370.7               |

CMM210212 TZB-005

Consistency: Unknown\*, unknown  
purity\*

Data set 1H: CMM210212 4 1 /opt/topspin4.1.3  
Structure: /opt/topspin4.1.3/CMM210212/4/structure.mol  
Acquisition date: February 12, 2021 9:22:19 AM EST  
Solvent: DMSO  
Probe: 5 mm PATXI 1H/D/19F-13C/15N Z-GRD Z855801/0017  
Eretic reference:

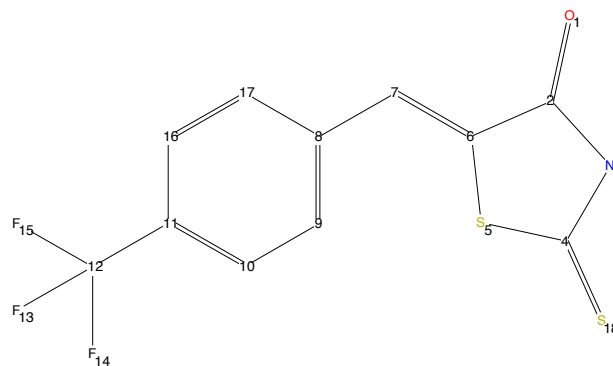

Sum formula:  
C<sub>11</sub>H<sub>6</sub>F<sub>3</sub>NOS<sub>2</sub>

Molecular Mass:  
288.98 Da

Comments:  
Multiplet interpretation available for spectrum.  
A multiplet interpretation for all major signals in the spectrum could be found. All given impurities could be assigned to regions in the spectrum.

Signature:

Automatic analysis generated by Bruker CMC (b:17).  
One or more results have not been created by automatic analysis, or edited manually: marked by '\*'.  
Report generated by Bruker CMC-assist TopSpin 4.1.3 (of 2021-06-28 13:00:50), on 'MacBook-Pro.local' as 'tzbenton'

Compound 23

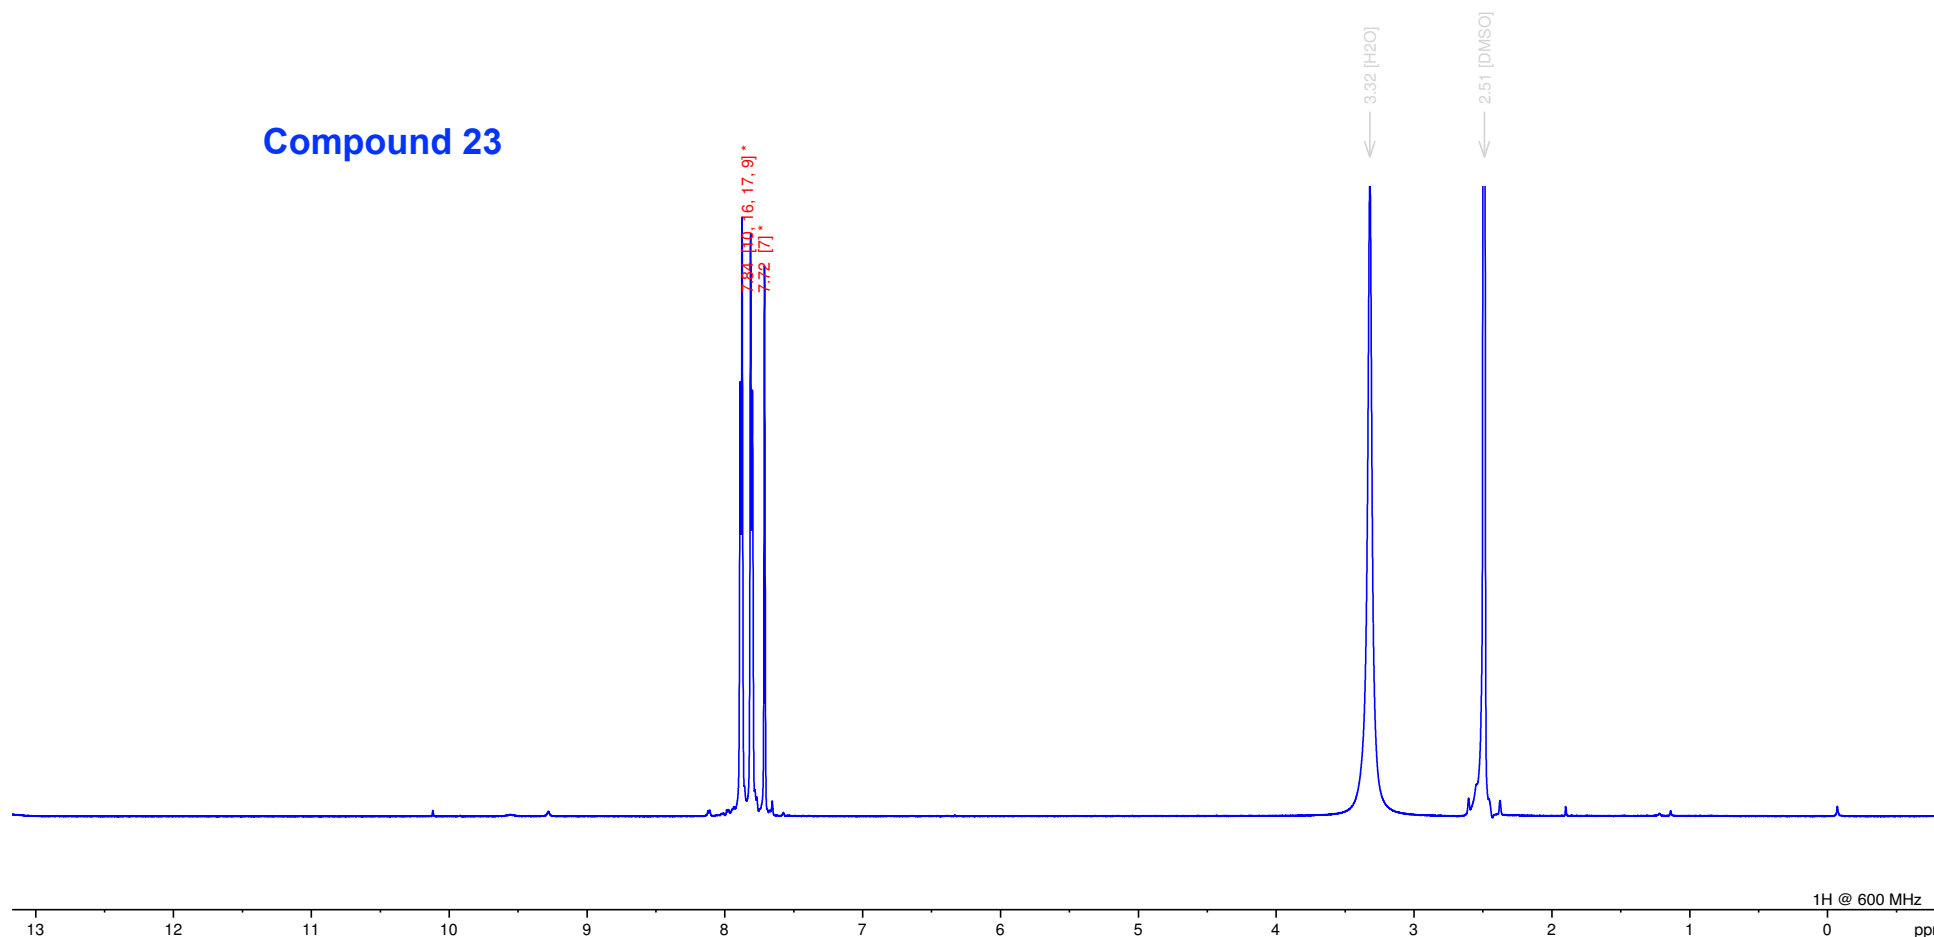

103dx-005

195.50

169.45

136.62

130.73

129.77

128.43

126.11

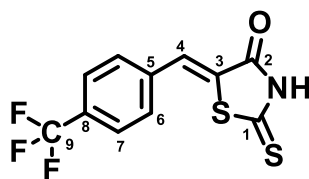

Compound 23

Acetone - d<sub>6</sub>

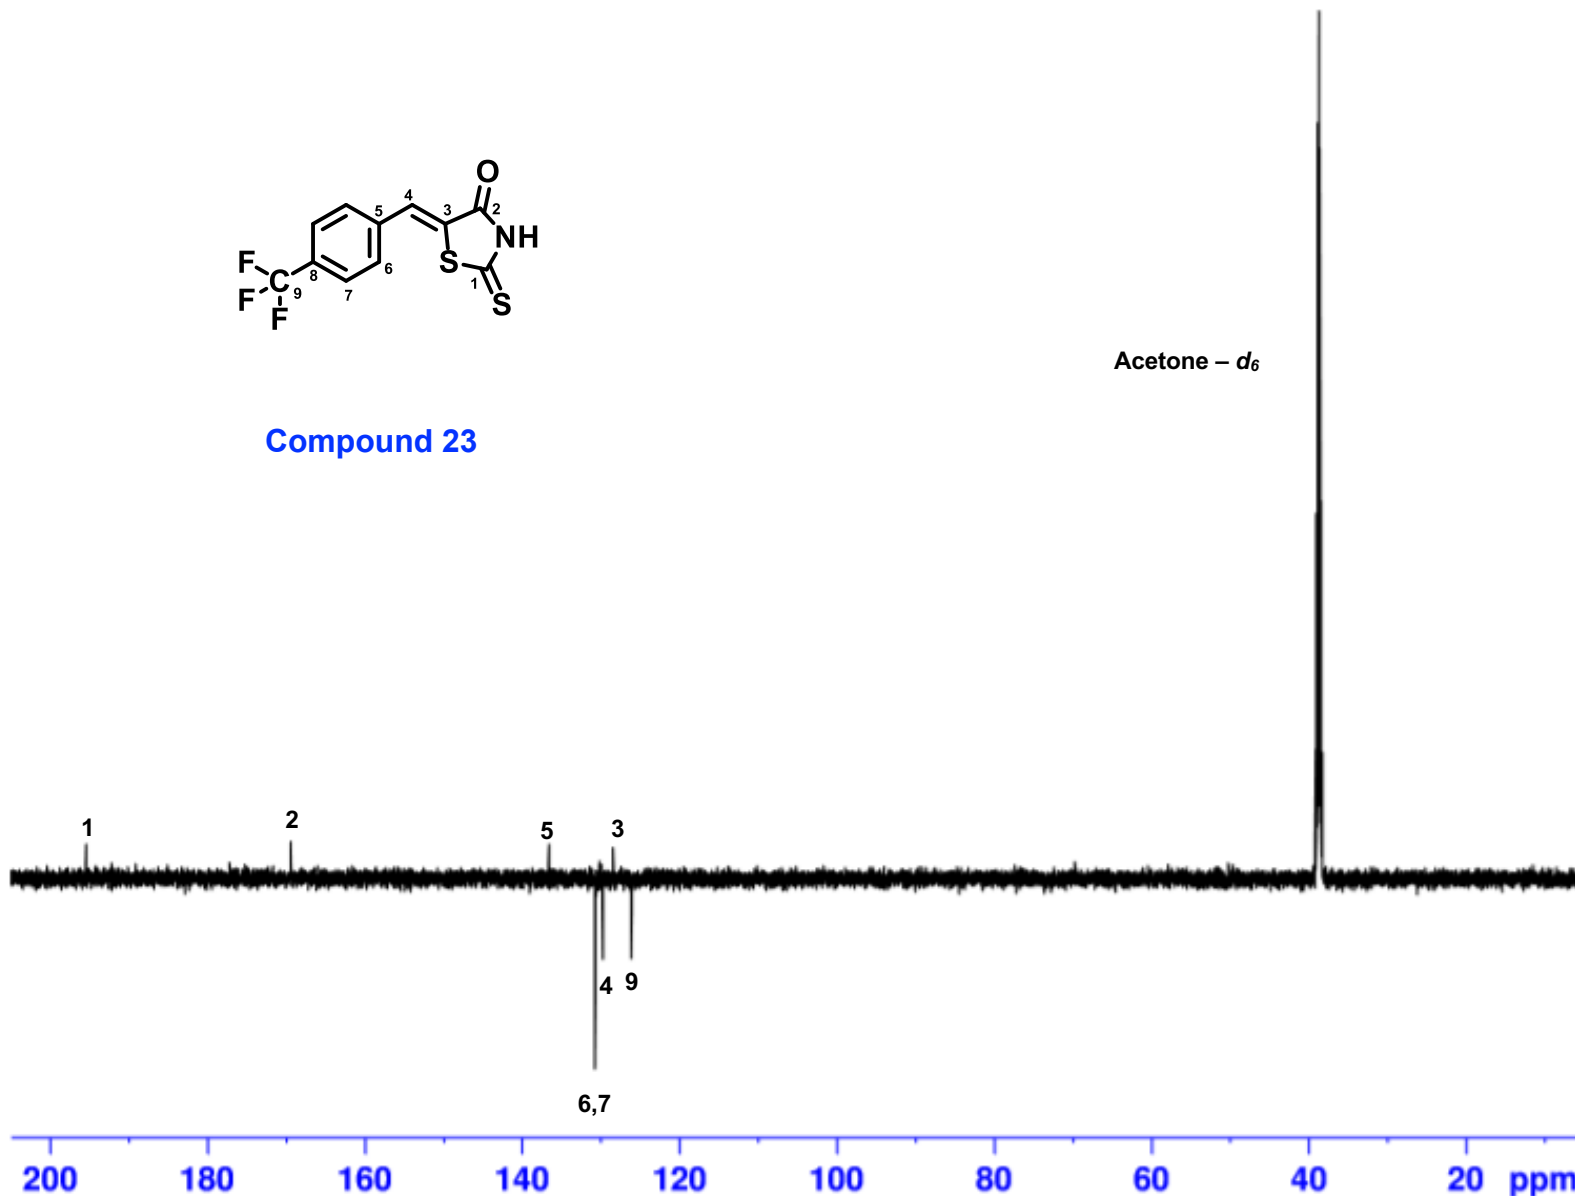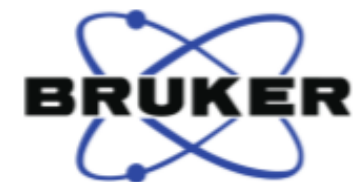

Current Data Parameters  
NAME CMM210910  
EXPNO 5  
PROCNO 1

F2 - Acquisition Parameters  
Date\_ 20210910  
Time 19.52  
INSTRUM spect  
PROBHD 5 mm PATXI 1H/  
PULPROG jmod  
TD 65536  
SOLVENT Acetone  
NS 4000  
DS 4  
SWH 36057.691 Hz  
FIDRES 0.550197 Hz  
AQ 0.9087659 sec  
RG 2050  
DW 13.867 usec  
DE 6.50 usec  
TE 301.3 K  
CNST2 145.000000  
CNST11 1.000000  
D1 2.0000000 sec  
D20 0.00689655 sec  
TD0 1

===== CHANNEL f1 =====  
SFO1 150.9178988 MHz  
NUC1 13C  
P1 11.80 usec  
P2 23.60 usec  
PLW1 202.10000610 W

===== CHANNEL f2 =====  
SFO2 600.1324005 MHz  
NUC2 1H  
CPDPRG[2] waltz16  
PCPD2 70.00 usec  
PLW2 13.69999981 W  
PLW12 0.17449000 W

F2 - Processing parameters  
SI 32768  
SF 150.9028090 MHz  
WDW EM  
SSB 0  
LB 1.00 Hz  
GB 0  
PC 1.40

# SAMPLE INFORMATION

|                                          |                        |                     |                                |
|------------------------------------------|------------------------|---------------------|--------------------------------|
| Sample Name:                             | 2021Feb08_TZB103dx_005 | Acquired By:        | System                         |
| Sample Type:                             | Unknown                | Sample Set Name     | TZB_103dx                      |
| Vial:                                    | 1:F,3                  | Acq. Method Set:    | ReversePhase_12min_Max Plot    |
| Injection #:                             | 1                      | Processing Method:  | ReversePhase_Purity_MAX Plot   |
| Injection Volume:                        | 1.00 ul                | Channel Name:       | PDA Max Plot 190.0 - 800.0     |
| Run Time:                                | 12.0 Minutes           | Proc. Chnl. Descr.: | PDA MaxPlot (190.0 nm to 800.0 |
| Date Acquired: 2/8/2021 2:32:10 PM EST   |                        |                     |                                |
| Date Processed: 8/31/2021 3:50:59 PM EDT |                        |                     |                                |

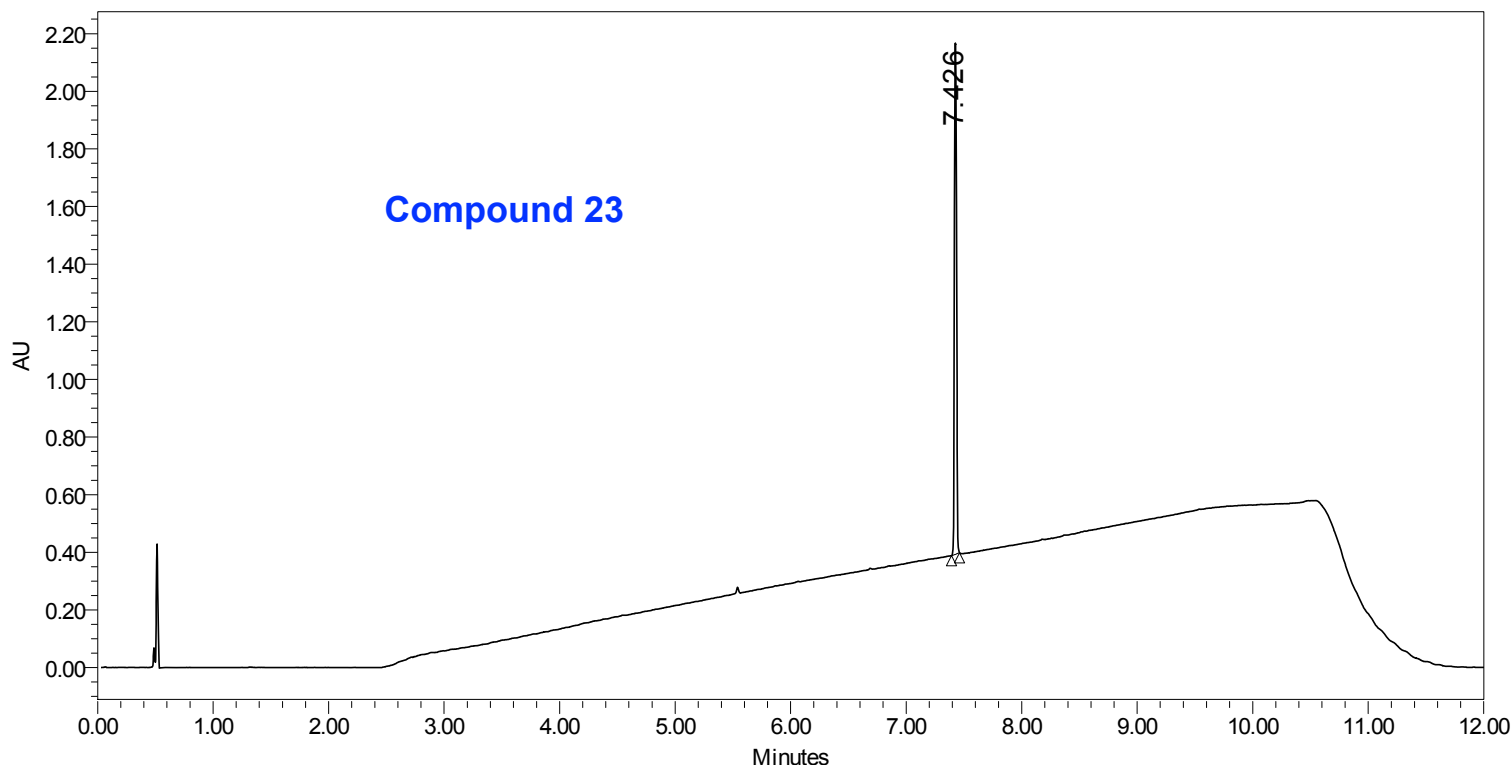

|   | RT    | Area    | % Area | Height  | Peak<br>Lambda Max. |
|---|-------|---------|--------|---------|---------------------|
| 1 | 7.426 | 2274749 | 100.00 | 1774733 | 358.9               |



CMM210625 MJF-28

Consistency: Unknown\*, unknown  
purity\*

Data set 1H: CMM210625 3 1 /opt/topspin4.1.3  
Structure: /opt/topspin4.1.3/CMM210625/3/structure.mol  
Acquisition date: June 25, 2021 2:40:32 PM EDT  
Solvent: DMSO  
Probe: 5 mm PATXI 1H/D/19F-13C/15N Z-GRD Z855801/0017  
Eretic reference:

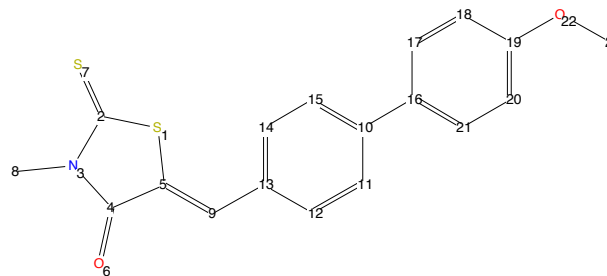

Sum formula:  
C<sub>18</sub>H<sub>15</sub>NO<sub>2</sub>S<sub>2</sub>

Molecular Mass:  
341.05 Da

Comments:  
Multiplet interpretation available for spectrum.  
A multiplet interpretation for all major signals in the spectrum could be found. All given impurities could be assigned to regions in the spectrum.

Signature:

Automatic analysis generated by Bruker CMC (b:17).  
One or more results have not been created by automatic analysis, or edited manually: marked by '\*'.  
Report generated by Bruker CMC-assist TopSpin 4.1.3 (of 2021-06-28 13:00:50), on 'MacBook-Pro.local' as 'tzbenton'

Compound 24

7.84 [9, 12, 14]\*  
7.73 [18, 20, 15, 11]\*

7.08 [17, 21]\*

3.81 [23]\*

3.41 [8]\*

3.31 [H<sub>2</sub>O]

2.49 [DMSO]

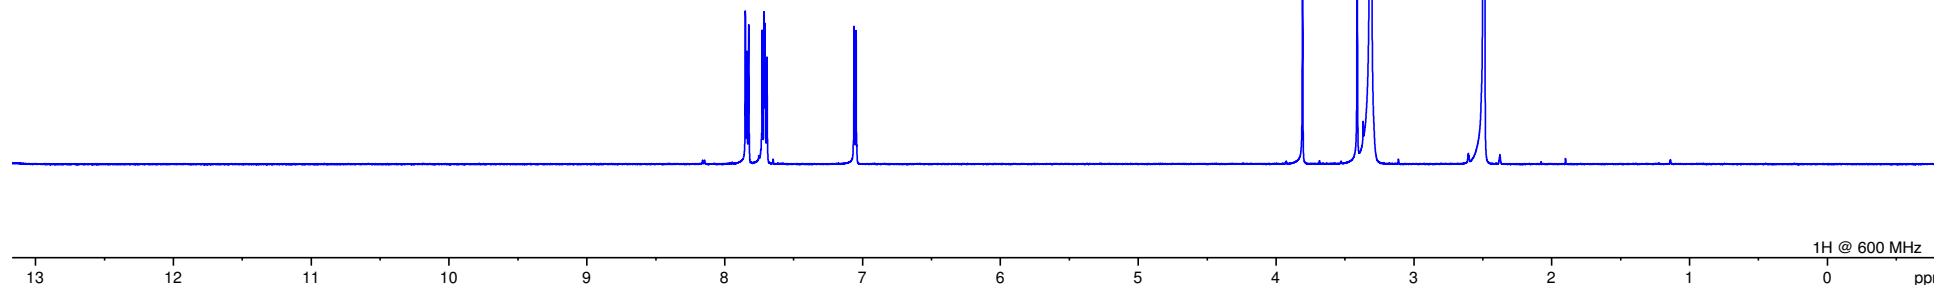

1H @ 600 MHz  
ppm

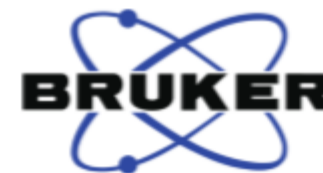

Current Data Parameters  
NAME CMM210917  
EXPNO 3  
PROCNO 1

F2 - Acquisition Parameters  
Date\_ 20210917  
Time 10.52  
INSTRUM spect  
PROBHD 5 mm PATXI 1H/  
PULPROG jmod  
TD 65536  
SOLVENT DMSO  
NS 1000  
DS 4  
SWH 36057.691 Hz  
FIDRES 0.550197 Hz  
AQ 0.9087659 sec  
RG 2050  
DW 13.867 usec  
DE 6.50 usec  
TE 300.9 K  
CNST2 145.000000  
CNST11 1.000000  
D1 2.0000000 sec  
D20 0.00689655 sec  
TD0 1

===== CHANNEL f1 =====  
SFO1 150.9178988 MHz  
NUC1 13C  
P1 11.80 usec  
P2 23.60 usec  
PLW1 202.10000610 W

===== CHANNEL f2 =====  
SFO2 600.1324005 MHz  
NUC2 1H  
CPDPRG[2] waltz16  
PCPD2 70.00 usec  
PLW2 13.69999981 W  
PLW12 0.17449000 W

F2 - Processing parameters  
SI 32768  
SF 150.9028090 MHz  
WDW EM  
SSB 0  
LB 1.00 Hz  
GB 0  
PC 1.40

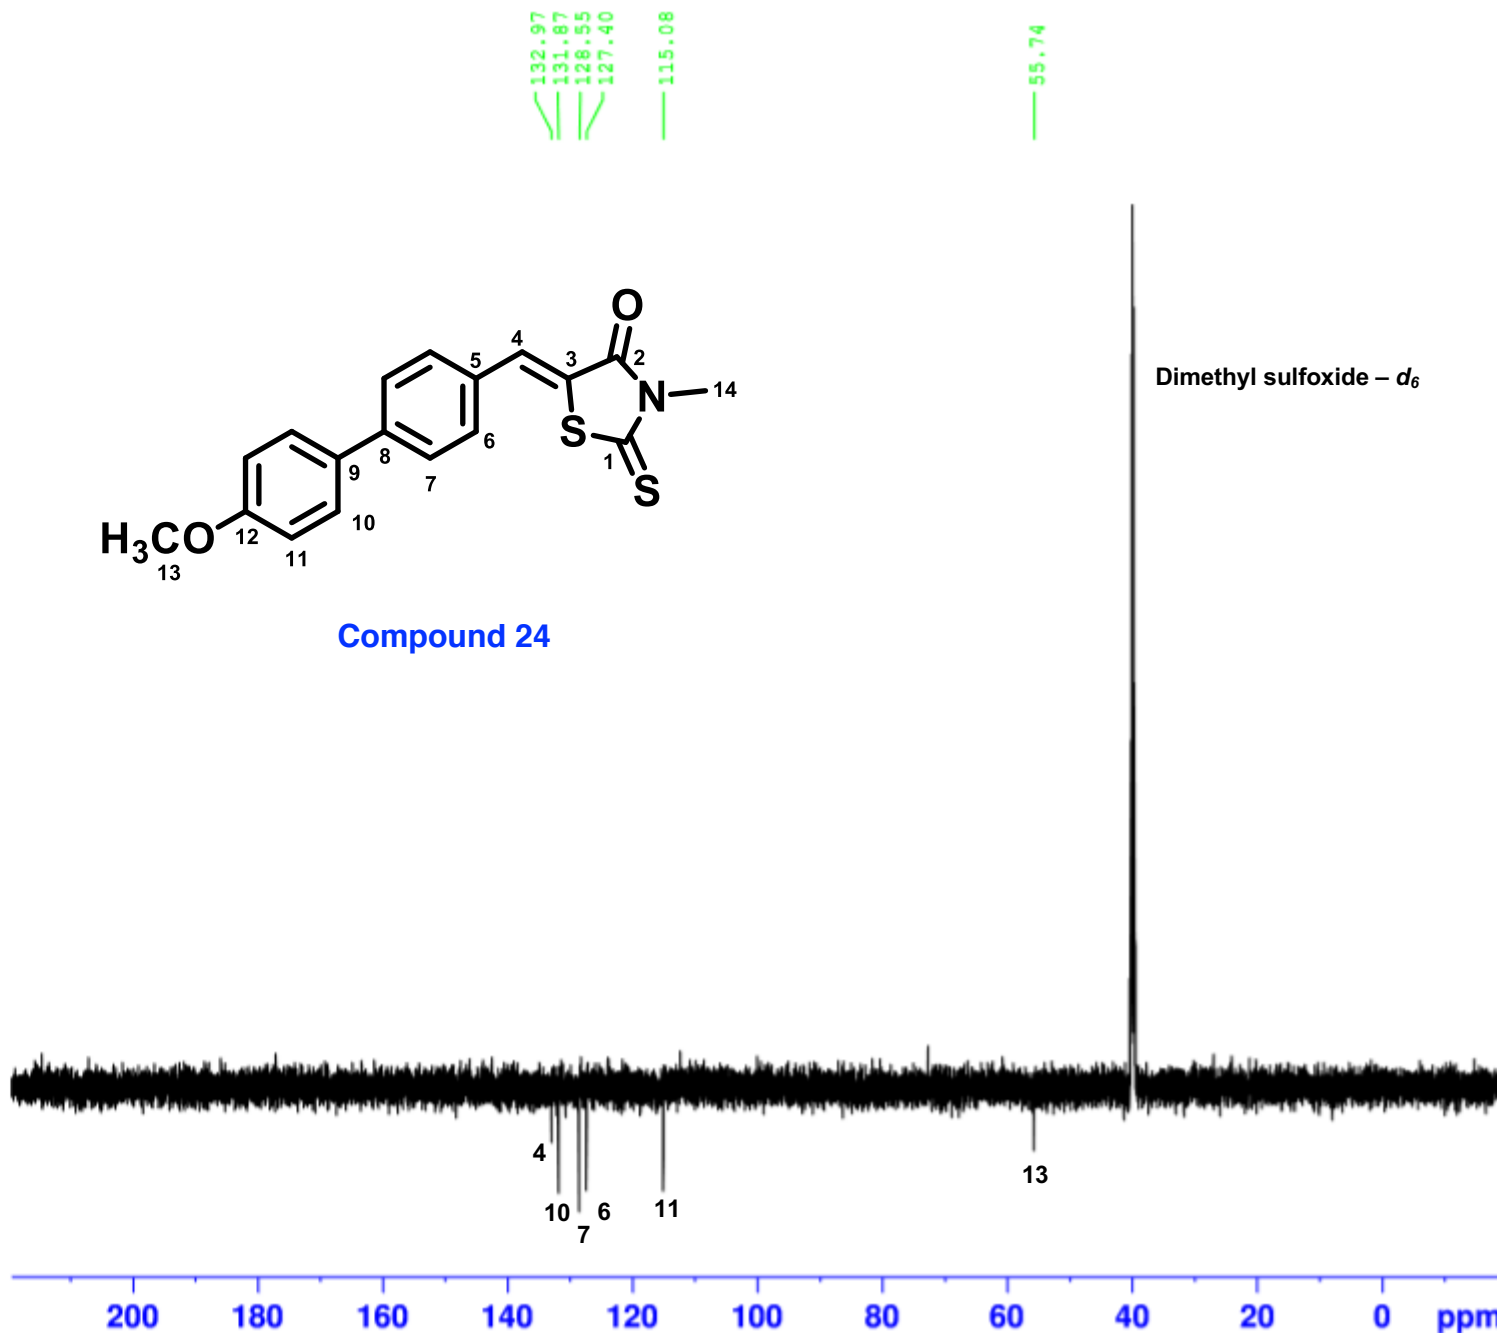

# SAMPLE INFORMATION

|                   |                           |                     |                                 |
|-------------------|---------------------------|---------------------|---------------------------------|
| Sample Name:      | 2021June24_MJF_28_2       | Acquired By:        | System                          |
| Sample Type:      | Unknown                   | Sample Set Name     | TZB_103dx                       |
| Vial:             | 1:A,2                     | Acq. Method Set:    | ReversePhase_12min_Max Plot     |
| Injection #:      | 1                         | Processing Method:  | ReversePhase_Purity_MAX Plot    |
| Injection Volume: | 5.00 ul                   | Channel Name:       | PDA Max Plot 190.0 - 800.0      |
| Run Time:         | 12.0 Minutes              | Proc. Chnl. Descr.: | PDA MaxPlot (190.0 nm to 800.0) |
|                   |                           |                     |                                 |
| Date Acquired:    | 6/24/2021 10:21:57 AM EDT |                     |                                 |
| Date Processed:   | 8/31/2021 4:00:53 PM EDT  |                     |                                 |

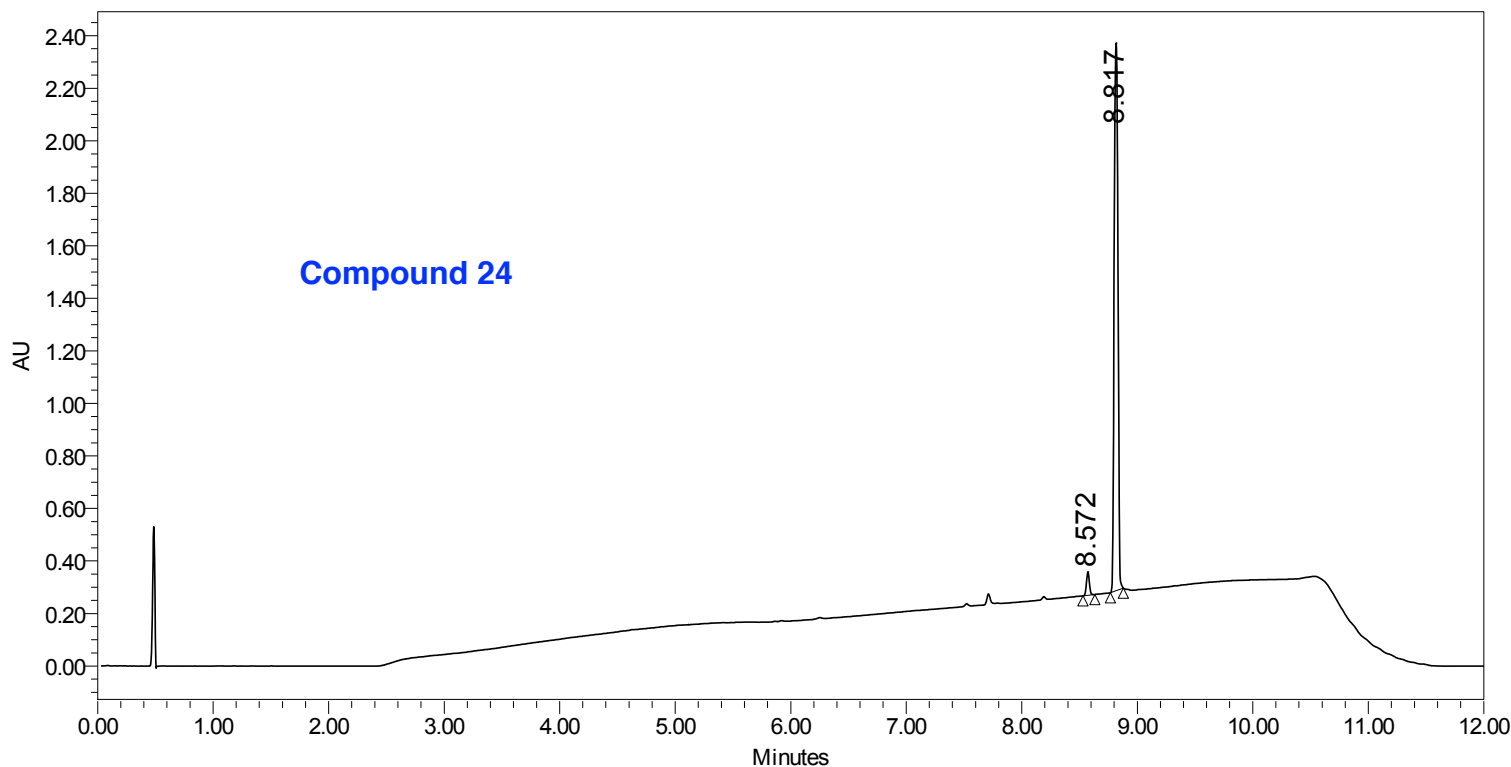

|   | RT    | Area    | % Area | Height  | Peak<br>Lambda Max. |
|---|-------|---------|--------|---------|---------------------|
| 1 | 8.572 | 152765  | 3.12   | 89487   | 407.4               |
| 2 | 8.817 | 4751200 | 96.88  | 2086075 | 392.4               |

CMM210623

Consistency: Unknown\*, unknown  
purity\*

Data set 1H: CMM210623 3 1 /opt/topspin4.1.3  
Structure: /opt/topspin4.1.3/CMM210623/3/structure.mol  
Acquisition date: June 23, 2021 1:45:00 PM EDT  
Solvent: DMSO  
Probe: 5 mm PATXI 1H/D/19F-13C/15N Z-GRD Z855801/0017  
Eretic reference:

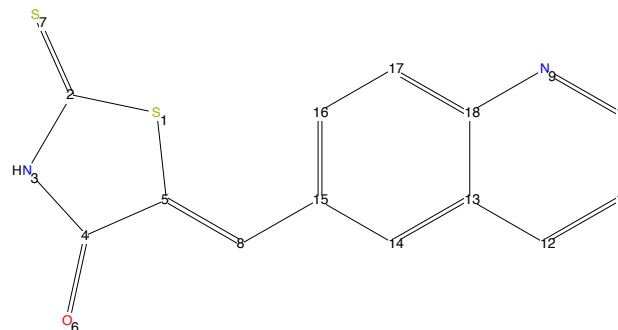

Sum formula:  
C<sub>13</sub>H<sub>8</sub>N<sub>2</sub>OS<sub>2</sub>

Molecular Mass:  
272.01 Da

**Comments:**  
Multiplet interpretation available for spectrum. Multiplet interpretation available for spectrum.  
A multiplet interpretation for all major signals in the spectrum could be found. All given impurities could be assigned to regions in the spectrum. A multiplet interpretation for all major signals in the spectrum could be found. All given impurities could be assigned to regions in the spectrum.

**Signature:**

Automatic analysis generated by Bruker CMC (b:17).  
One or more results have not been created by automatic analysis, or edited manually: marked by '\*'.  
Report generated by Bruker CMC-assist TopSpin 4.1.3 (of 2021-06-28 13:00:50), on 'MacBook-Pro.local' as 'tzbenton'

Compound 25

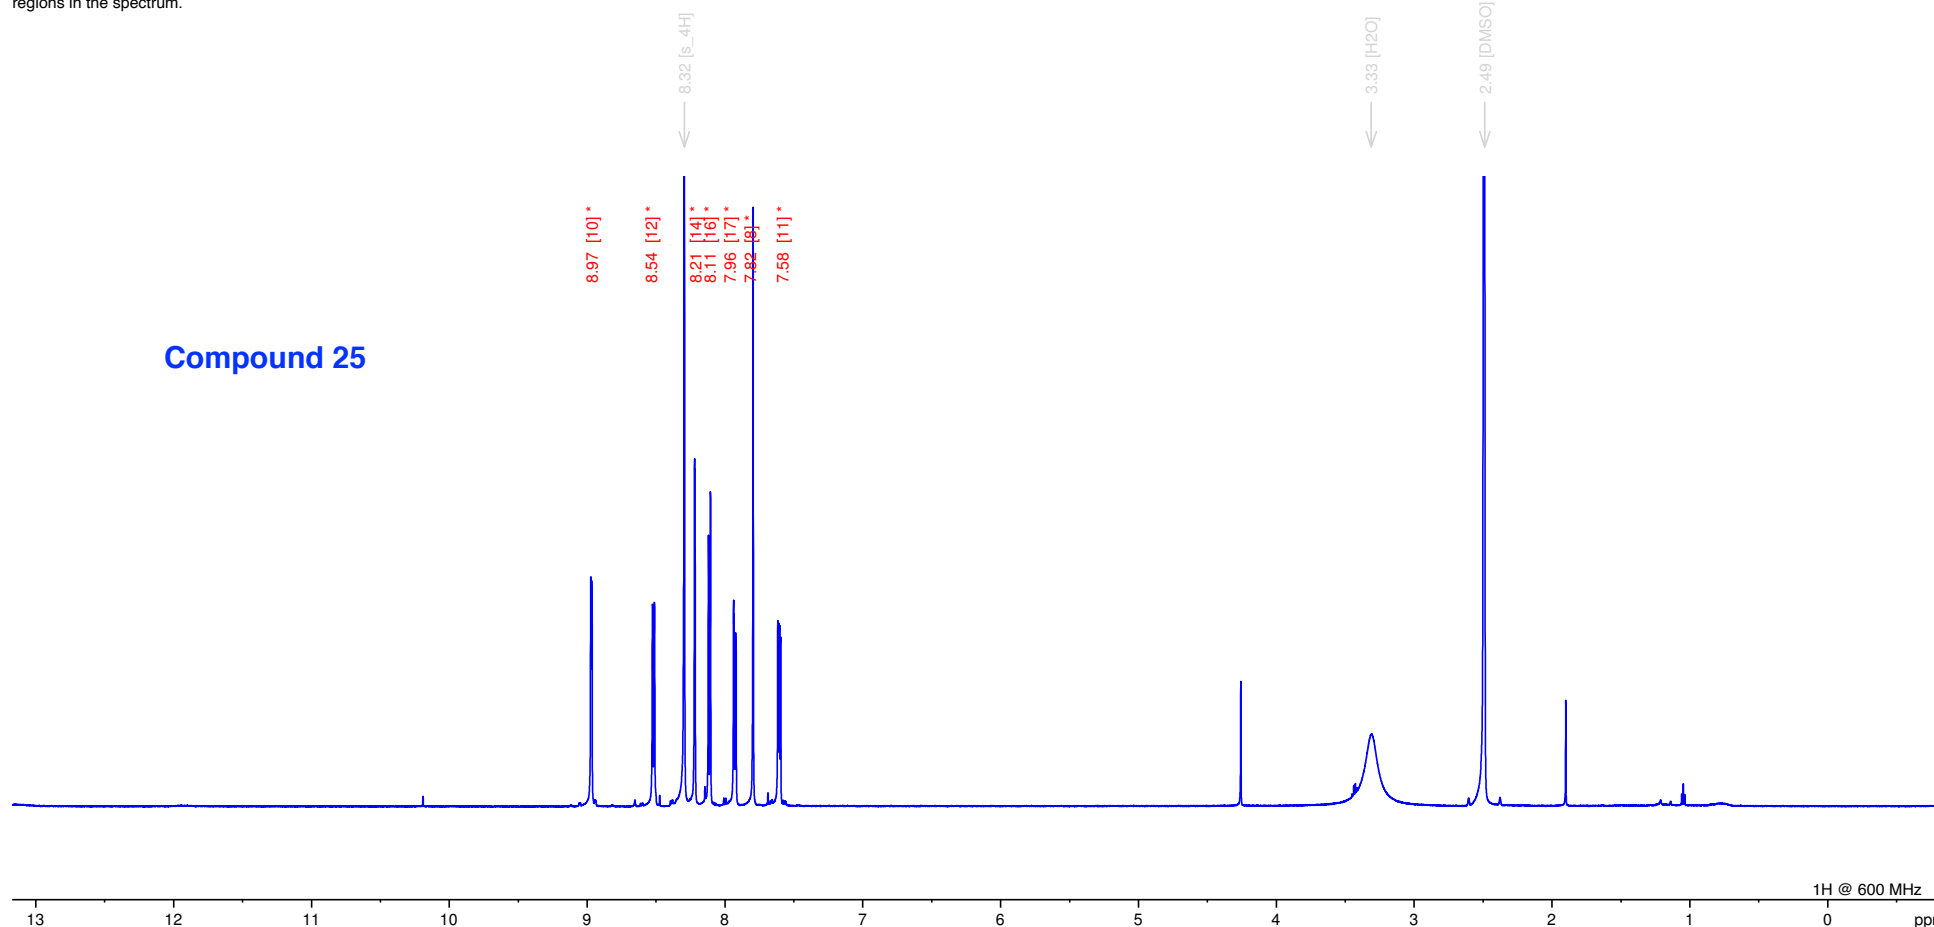

25 (JMT-175)

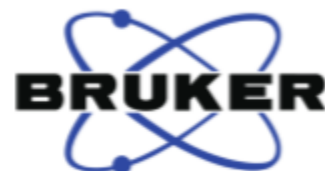

Current Data Parameters  
 NAME CMM210916  
 EXPNO 4  
 PROCNO 1

F2 - Acquisition Parameters  
 Date\_ 20210916  
 Time 12.57  
 INSTRUM spect  
 PROBHD 5 mm PATXI 1H/  
 PULPROG jmod  
 TD 65536  
 SOLVENT DMSO  
 NS 1000  
 DS 4  
 SWH 36057.691 Hz  
 FIDRES 0.550197 Hz  
 AQ 0.9087659 sec  
 RG 2050  
 DW 13.867 usec  
 DE 6.50 usec  
 TE 301.2 K  
 CNST2 145.0000000  
 CNST11 1.0000000  
 D1 2.00000000 sec  
 D20 0.00689655 sec  
 TD0 1

===== CHANNEL f1 =====  
 SFO1 150.9178988 MHz  
 NUC1 13C  
 P1 11.80 usec  
 P2 23.60 usec  
 PLW1 202.10000610 W

===== CHANNEL f2 =====  
 SFO2 600.1324005 MHz  
 NUC2 1H  
 CPDPRG[2] waltz16  
 PCPD2 70.00 usec  
 PLW2 13.69999981 W  
 PLW12 0.17449000 W

F2 - Processing parameters  
 SI 32768  
 SF 150.9028090 MHz  
 WDW EM  
 SSB 0  
 LB 1.00 Hz  
 GB 0  
 PC 1.40

Dimethyl sulfoxide - d<sub>6</sub>

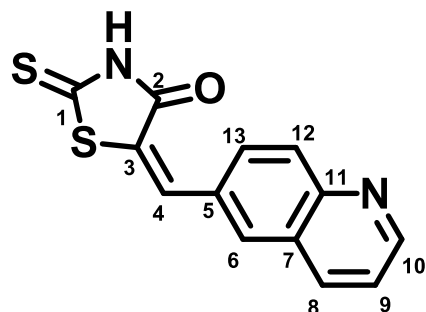

Compound 25

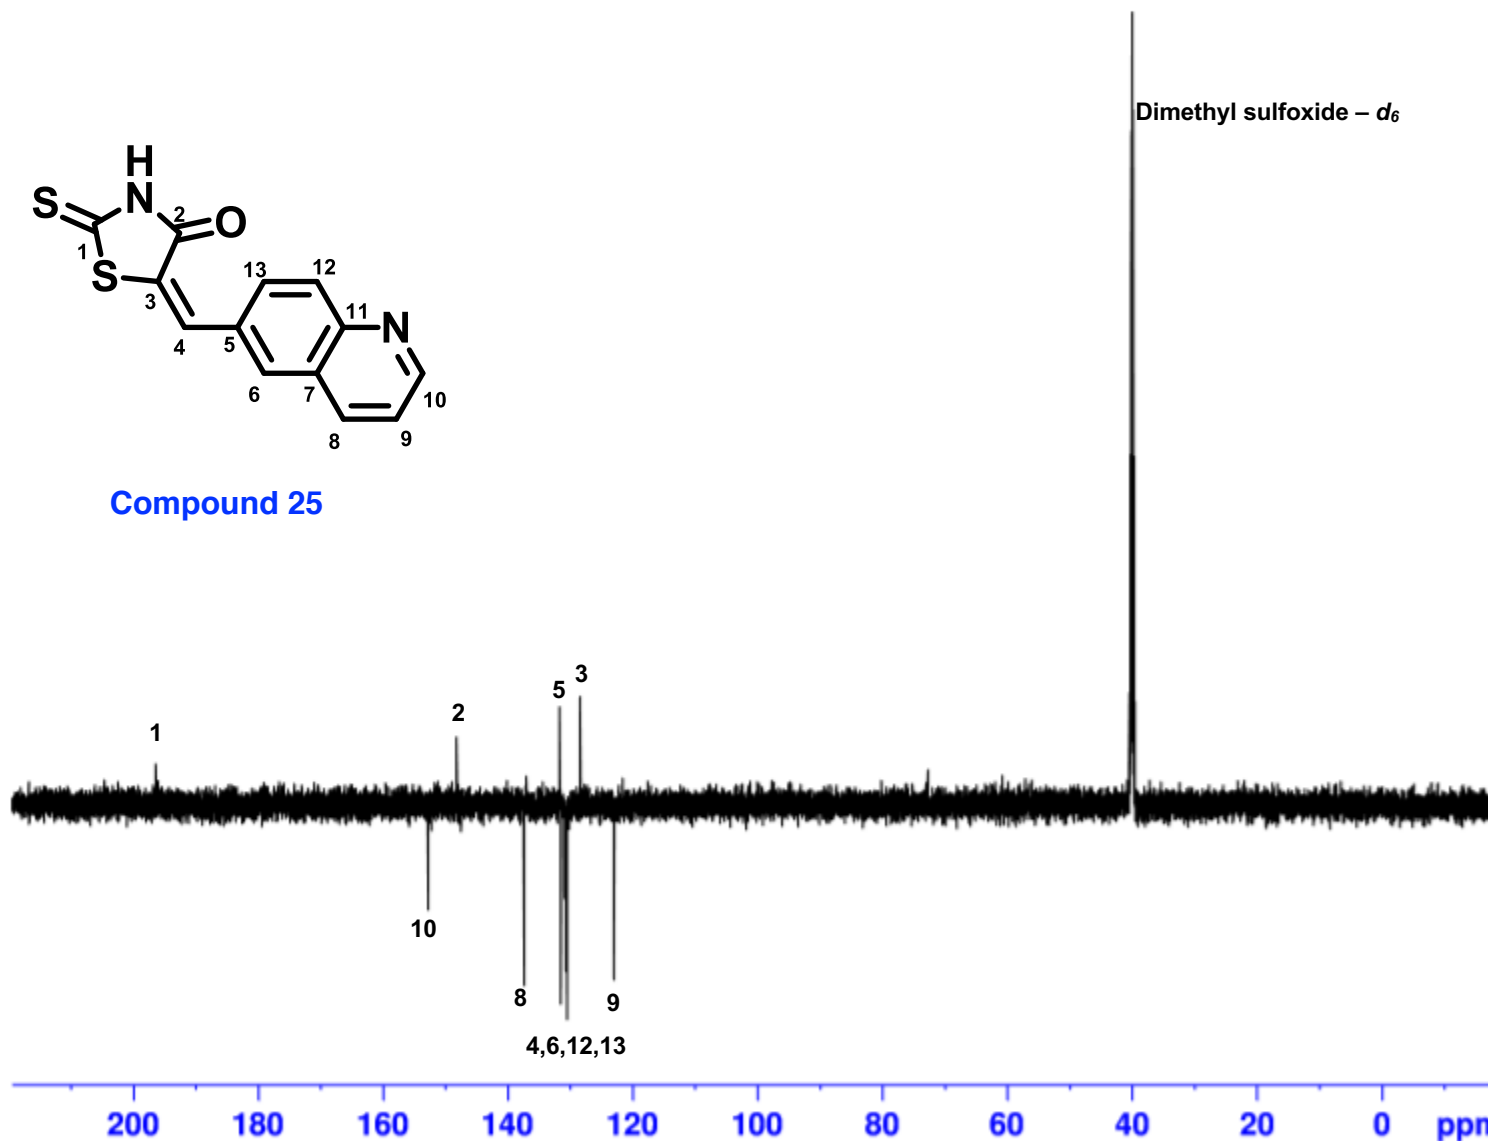

196.41

152.79

148.21

137.41

131.51

130.89

130.71

130.52

128.42

123.00

# SAMPLE INFORMATION

|                                          |              |                     |                                 |
|------------------------------------------|--------------|---------------------|---------------------------------|
| Sample Name:                             | 175          | Acquired By:        | System                          |
| Sample Type:                             | Unknown      | Sample Set Name     | 103dx_JMT                       |
| Vial:                                    | 1:B,7        | Acq. Method Set:    | ReversePhase_12min_Max Plot     |
| Injection #:                             | 1            | Processing Method:  | ReversePhase_Purity_MAX Plot    |
| Injection Volume:                        | 1.00 ul      | Channel Name:       | PDA Max Plot 190.0 - 800.0      |
| Run Time:                                | 12.0 Minutes | Proc. Chnl. Descr.: | PDA MaxPlot (190.0 nm to 800.0) |
| Date Acquired: 7/28/2021 9:30:13 AM EDT  |              |                     |                                 |
| Date Processed: 8/31/2021 4:08:39 PM EDT |              |                     |                                 |

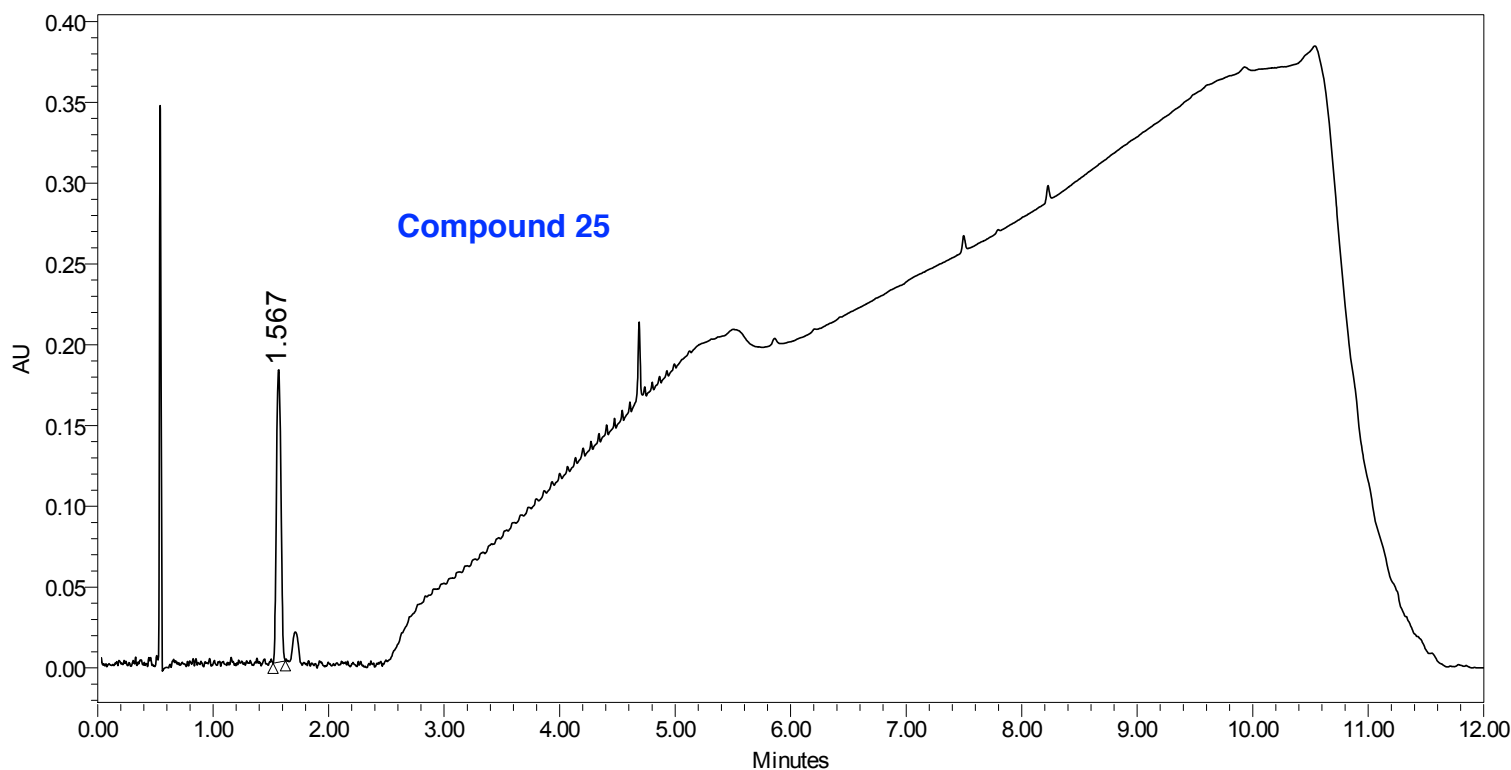

|   | RT    | Area   | % Area | Height | Peak<br>Lambda Max. |
|---|-------|--------|--------|--------|---------------------|
| 1 | 1.567 | 490728 | 100.00 | 180849 | 296.3               |



CMM210622 JMT-166

Consistency: Unknown\*, unknown  
purity\*

Data set 1H: CMM210622 11 1 /opt/topspin4.1.3  
Structure: /opt/topspin4.1.3/CMM210622/11/structure.mol  
Acquisition date: June 22, 2021 12:06:35 PM EDT  
Solvent: DMSO  
Probe: 5 mm PATXI 1H/D/19F-13C/15N Z-GRD Z855801/0017  
Eretic reference:

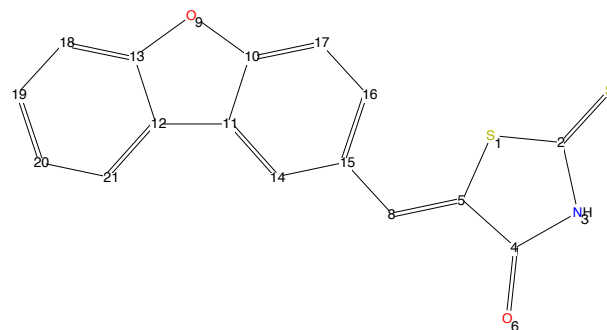

Sum formula:  
C<sub>16</sub>H<sub>8</sub>NO<sub>2</sub>S<sub>2</sub>

Molecular Mass:  
311.01 Da

**Comments:**  
Multiplet interpretation available for spectrum.  
A multiplet interpretation for all major signals in the spectrum could be found. All given impurities could be assigned to regions in the spectrum.

**Signature:**

Automatic analysis generated by Bruker CMC (b:17).  
One or more results have not been created by automatic analysis, or edited manually: marked by '\*'.  
Report generated by Bruker CMC-assist TopSpin 4.1.3 (of 2021-06-28 13:00:50), on 'MacBook-Pro.local' as 'tzbenton'

Compound 26

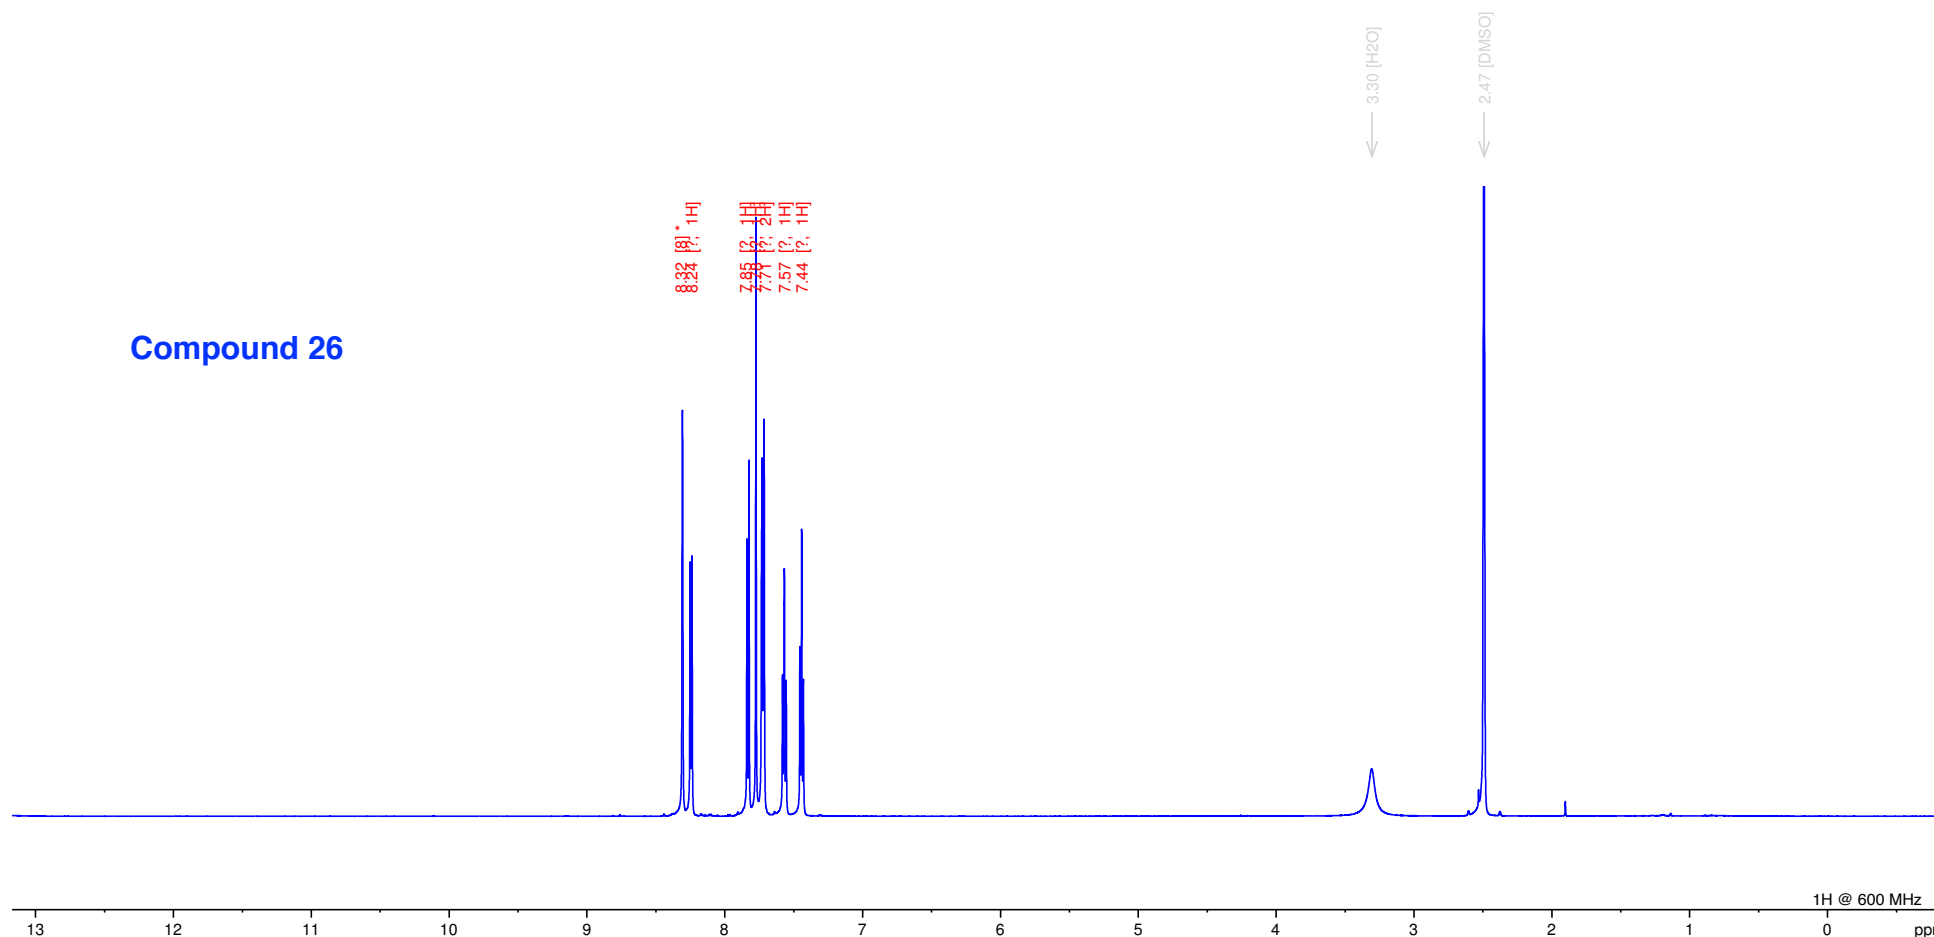

|    |   |    |  |
|----|---|----|--|
| GB | 0 |    |  |
| PC | 1 | 40 |  |

**Compound 26**

## Compound 26

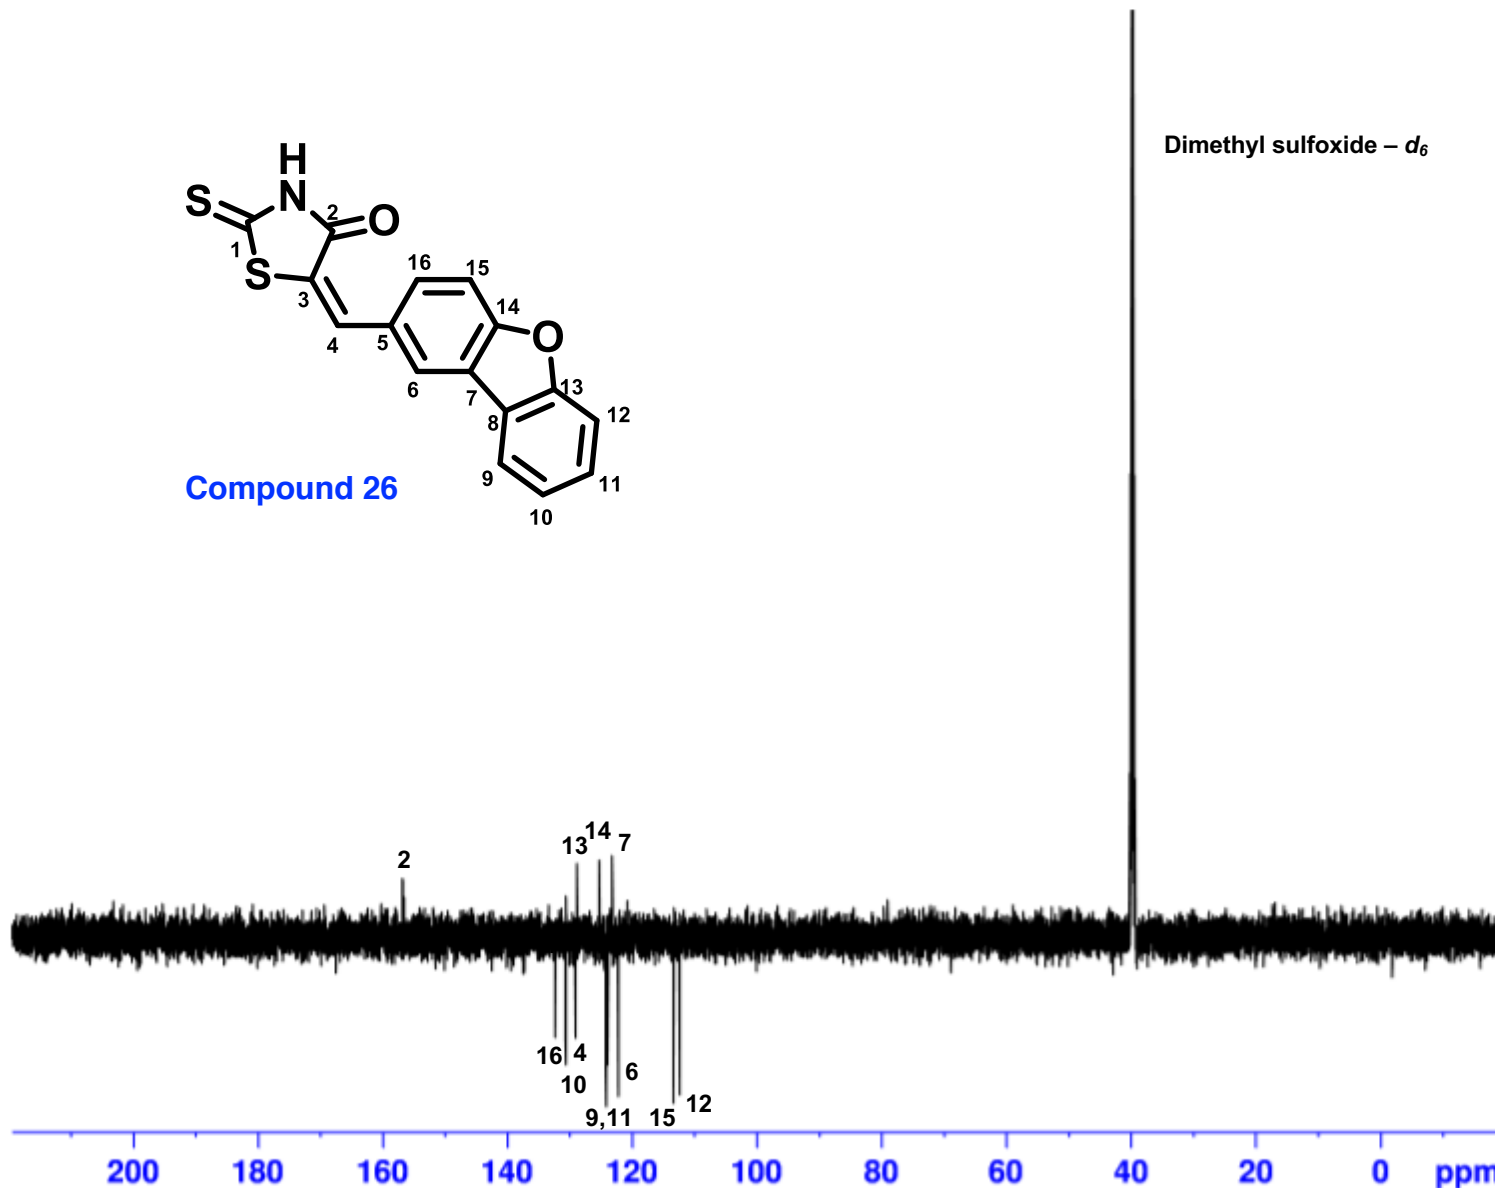

# SAMPLE INFORMATION

|                                          |              |                     |                                 |
|------------------------------------------|--------------|---------------------|---------------------------------|
| Sample Name:                             | 166          | Acquired By:        | System                          |
| Sample Type:                             | Unknown      | Sample Set Name     | 103dx_JMT                       |
| Vial:                                    | 1:B,3        | Acq. Method Set:    | ReversePhase_12min_Max Plot     |
| Injection #:                             | 1            | Processing Method:  | ReversePhase_Purity_MAX Plot    |
| Injection Volume:                        | 1.00 ul      | Channel Name:       | PDA Max Plot 190.0 - 800.0      |
| Run Time:                                | 12.0 Minutes | Proc. Chnl. Descr.: | PDA MaxPlot (190.0 nm to 800.0) |
| Date Acquired: 7/27/2021 8:46:42 PM EDT  |              |                     |                                 |
| Date Processed: 8/31/2021 3:41:45 PM EDT |              |                     |                                 |

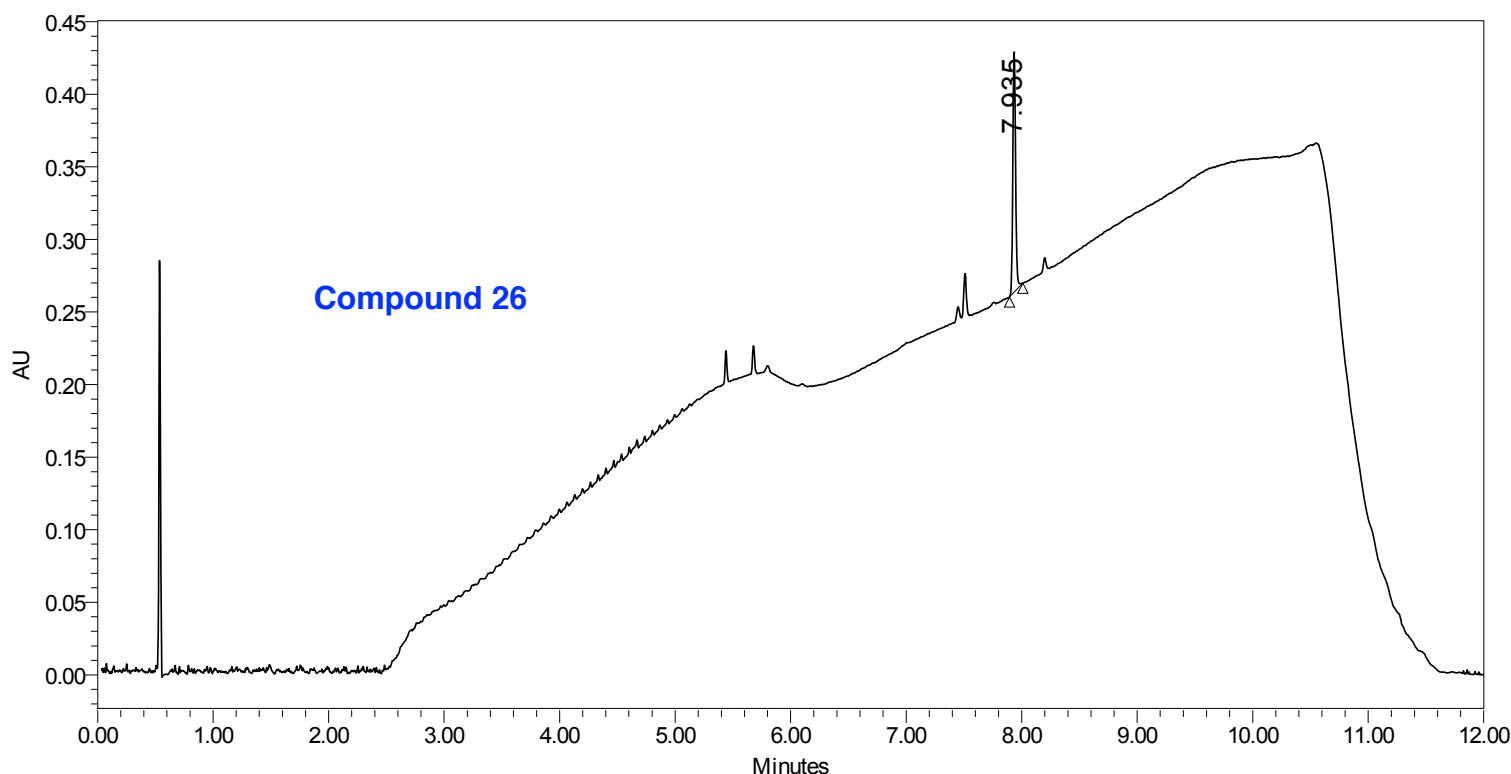

|   | RT    | Area   | % Area | Height | Peak<br>Lambda Max. |
|---|-------|--------|--------|--------|---------------------|
| 1 | 7.935 | 274502 | 100.00 | 165424 | 386.8               |

CMM210622

Consistency: Unknown\*, unknown  
purity\*

Data set 1H: CMM210622 8 1 /opt/topspin4.1.3  
Structure: /opt/topspin4.1.3/CMM210622/8/structure.mol  
Acquisition date: June 22, 2021 11:43:17 AM EDT  
Solvent: DMSO  
Probe: 5 mm PATXI 1H/D/19F-13C/15N Z-GRD Z855801/0017  
Eretic reference:

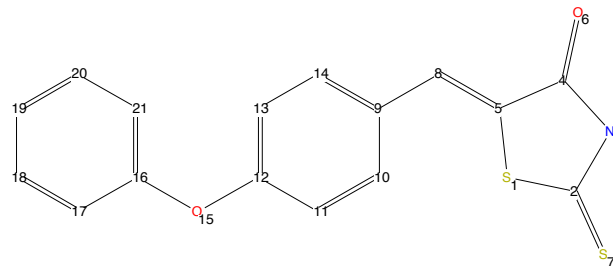

Sum formula:  
C<sub>16</sub>H<sub>11</sub>NO<sub>2</sub>S<sub>2</sub>

Molecular Mass:  
313.02 Da

**Comments:**  
Multiplet interpretation available for spectrum. Multiplet interpretation available for spectrum.  
A multiplet interpretation for all major signals in the spectrum could be found. All given impurities could be assigned to regions in the spectrum. A multiplet interpretation for all major signals in the spectrum could be found. All given impurities could be assigned to regions in the spectrum.

**Signature:**

Automatic analysis generated by Bruker CMC (b:17).  
One or more results have not been created by automatic analysis, or edited manually: marked by '\*'.  
Report generated by Bruker CMC-assist TopSpin 4.1.3 (of 2021-06-28 13:00:50), on 'MacBook-Pro.local' as 'tzbenton'

Compound 27

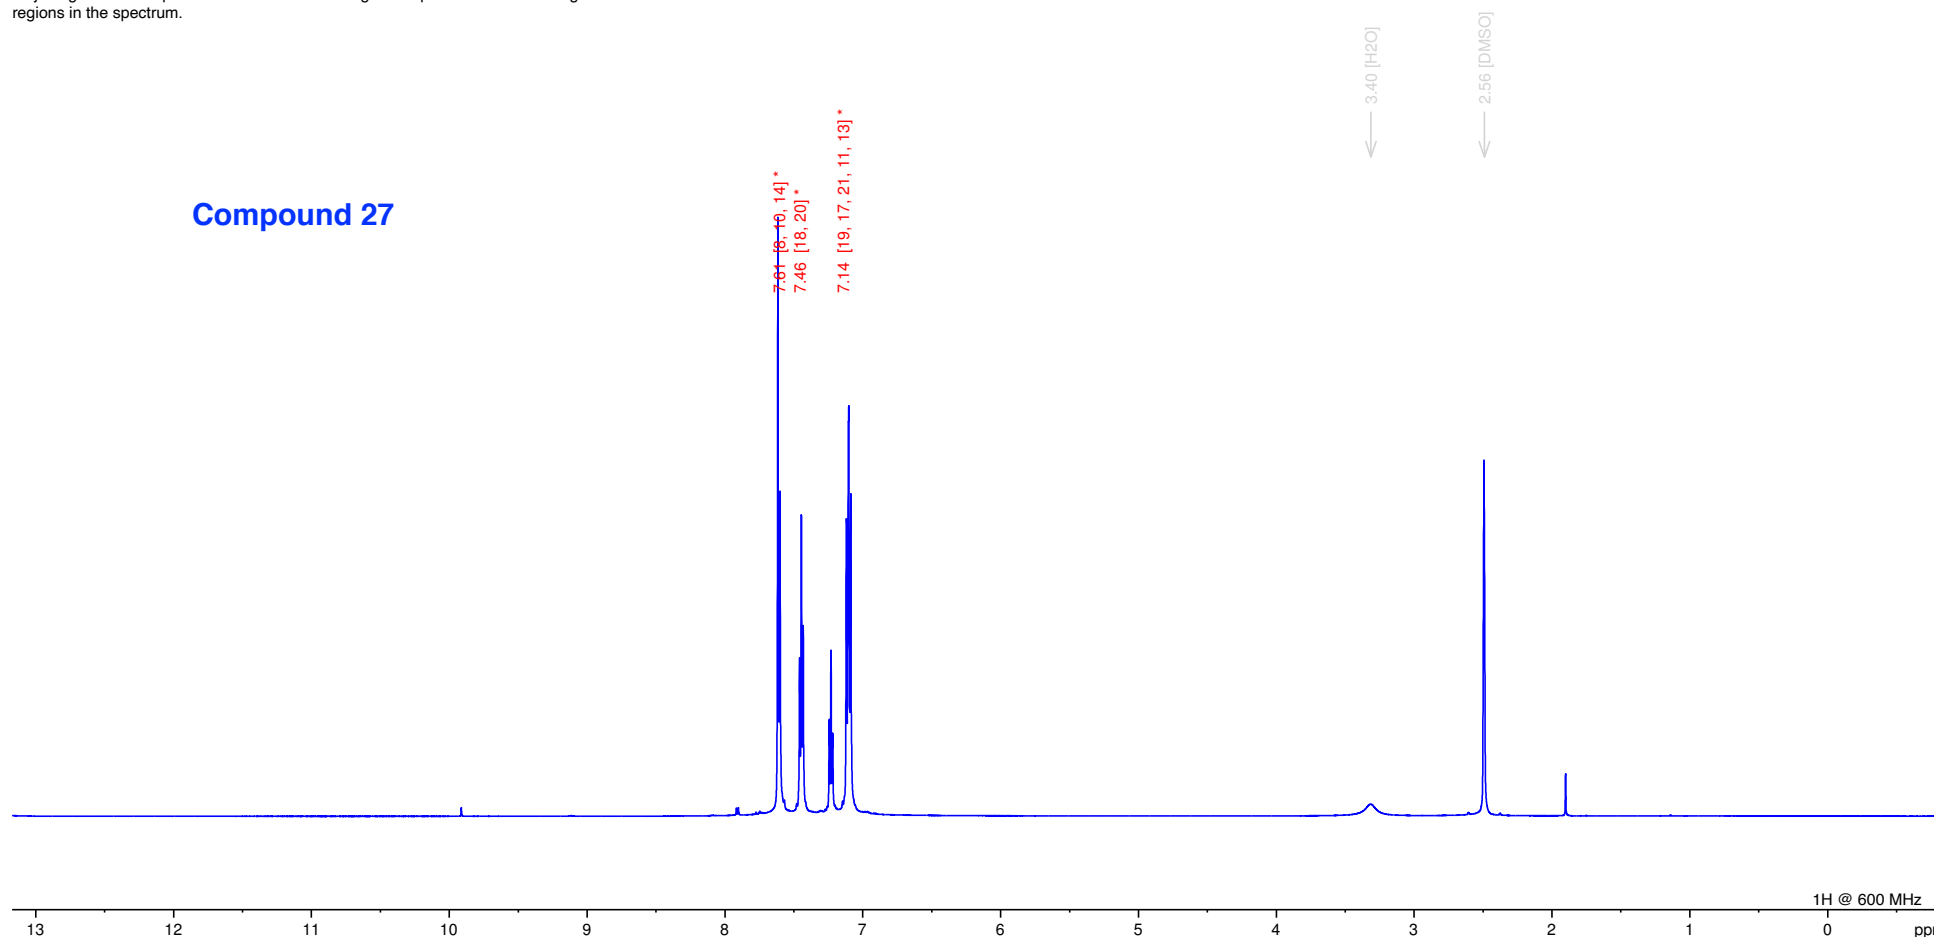

27 (JMT-168)

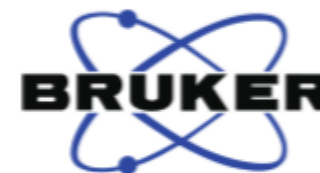

Compound 27

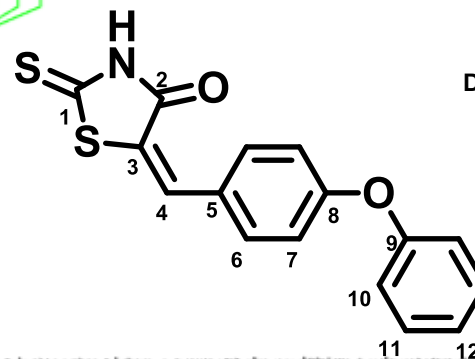

Dimethyl sulfoxide -  $d_6$

Current Data Parameters  
NAME CMM210915  
EXPNO 3  
PROCNO 1

F2 - Acquisition Parameters  
Date\_ 20210915  
Time 11.42  
INSTRUM spect  
PROBHD 5 mm PATXI 1H/  
PULPROG jmod  
TD 65536  
SOLVENT DMSO  
NS 1000  
DS 4  
SWH 36057.691 Hz  
FIDRES 0.550197 Hz  
AQ 0.9087659 sec  
RG 2050  
DW 13.867 usec  
DE 6.50 usec  
TE 301.2 K  
CNST2 145.0000000  
CNST11 1.0000000  
D1 2.0000000 sec  
D20 0.00689655 sec  
TD0 1

===== CHANNEL f1 =====  
SFO1 150.9178988 MHz  
NUC1 13C  
P1 11.80 usec  
P2 23.60 usec  
PLW1 202.10000610 W

===== CHANNEL f2 =====  
SFO2 600.1324005 MHz  
NUC2 1H  
PCPD2 waltz16  
PLW2 13.69999981 W  
PLW12 0.17449000 W

F2 - Processing parameters  
SI 32768  
SF 150.9028090 MHz  
WDW EM  
SSB 0  
LB 1.00 Hz  
GB 0  
PC 1.40

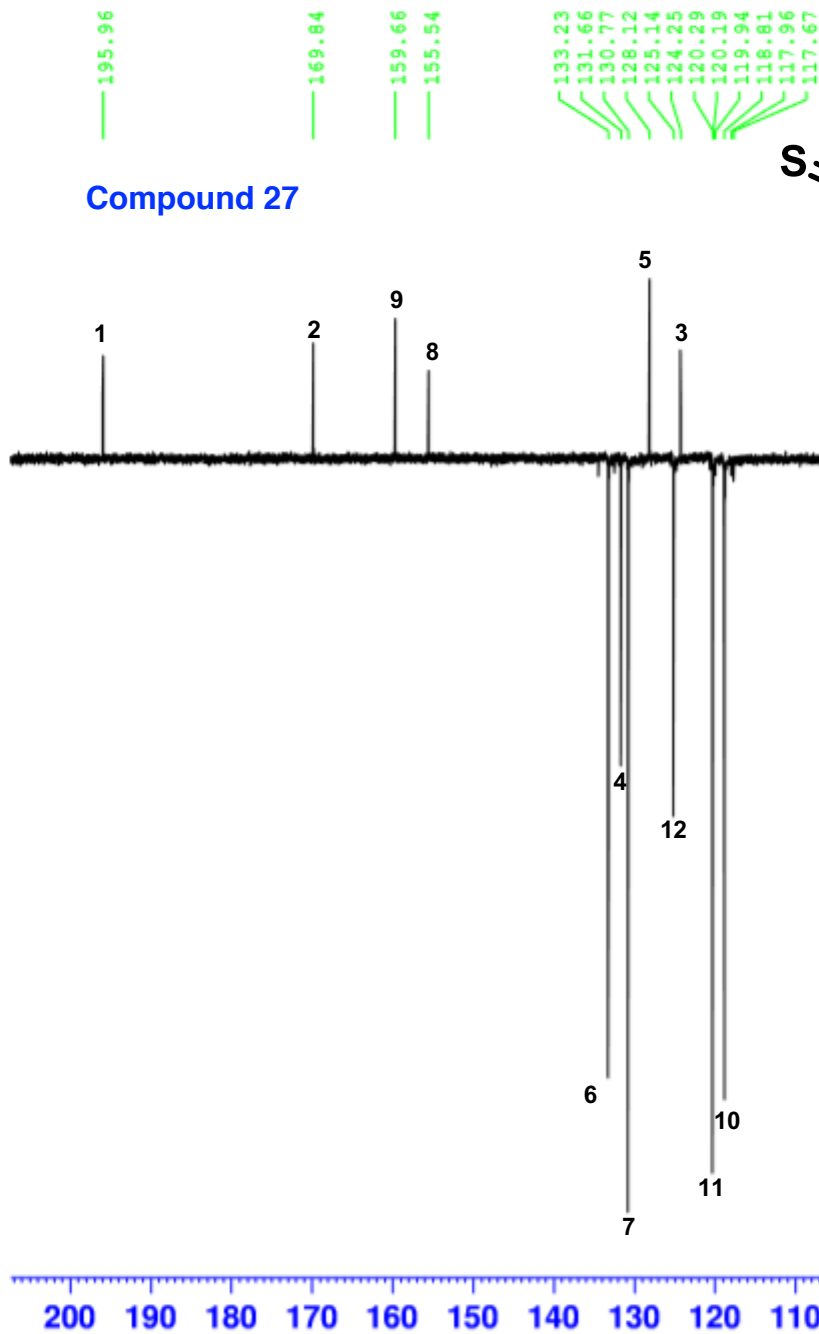

# SAMPLE INFORMATION

|                   |                          |                     |                                 |
|-------------------|--------------------------|---------------------|---------------------------------|
| Sample Name:      | 168                      | Acquired By:        | System                          |
| Sample Type:      | Unknown                  | Sample Set Name     | 103dx_JMT                       |
| Vial:             | 1:B,5                    | Acq. Method Set:    | ReversePhase_12min_Max Plot     |
| Injection #:      | 1                        | Processing Method:  | ReversePhase_Purity_MAX Plot    |
| Injection Volume: | 1.00 ul                  | Channel Name:       | PDA Max Plot 190.0 - 800.0      |
| Run Time:         | 12.0 Minutes             | Proc. Chnl. Descr.: | PDA MaxPlot (190.0 nm to 800.0) |
|                   |                          |                     |                                 |
| Date Acquired:    | 7/27/2021 9:10:46 PM EDT |                     |                                 |
| Date Processed:   | 8/31/2021 3:44:49 PM EDT |                     |                                 |

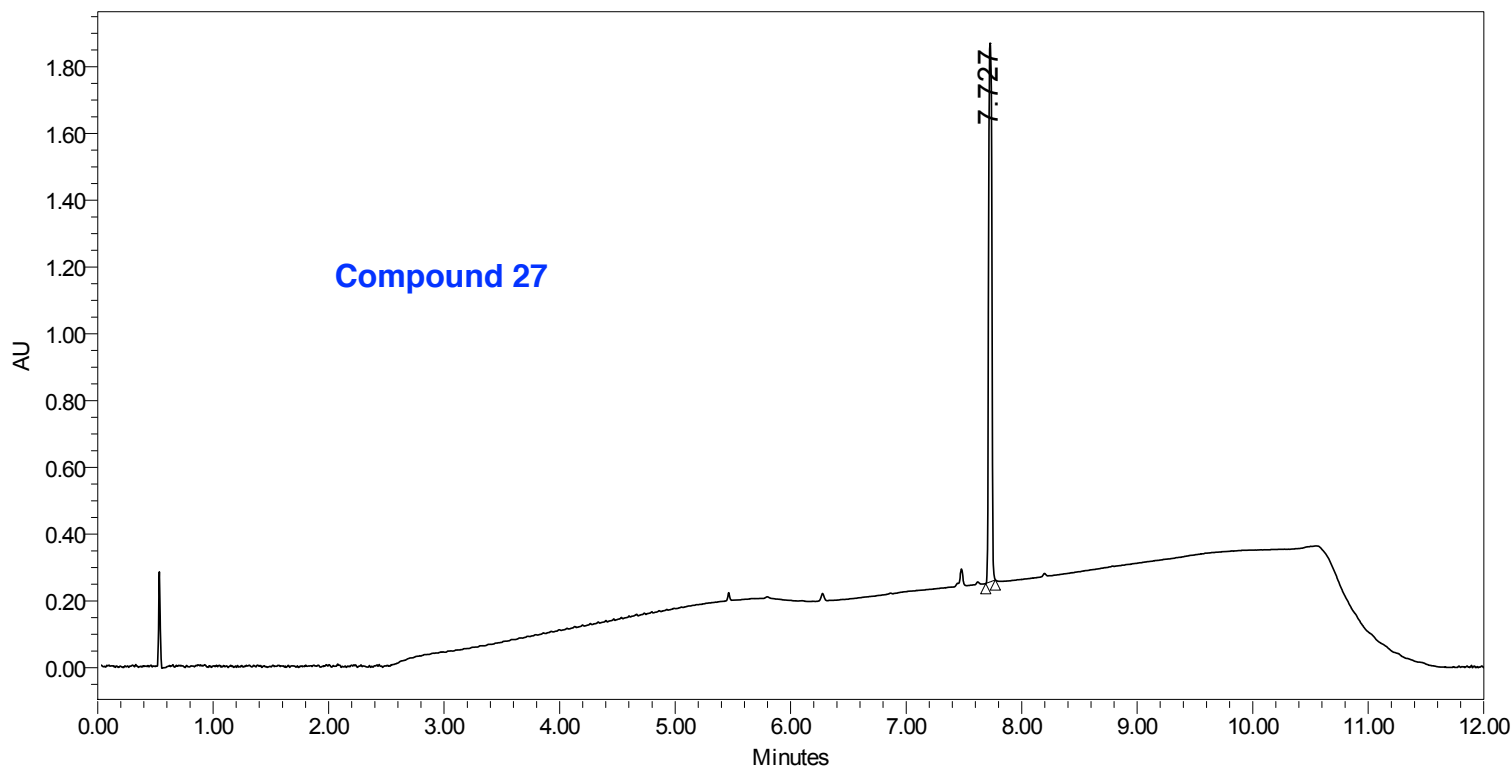

|   | RT    | Area    | % Area | Height  | Peak<br>Lambda Max. |
|---|-------|---------|--------|---------|---------------------|
| 1 | 7.727 | 3128203 | 100.00 | 1614391 | 373.8               |

CMM210622

Consistency: Unknown\*, unknown  
purity\*

Data set 1H: CMM210622 5 1 /opt/topspin4.1.3  
Structure: /opt/topspin4.1.3/CMM210622/5/structure.mol  
Acquisition date: June 22, 2021 11:25:46 AM EDT  
Solvent: DMSO  
Probe: 5 mm PATXI 1H/D/19F-13C/15N Z-GRD Z855801/0017  
Eretic reference:

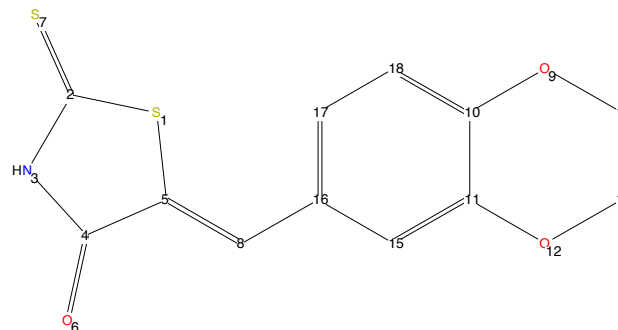

Sum formula:  
C<sub>12</sub>H<sub>6</sub>NO<sub>3</sub>S<sub>2</sub>

Molecular Mass:  
279.00 Da

**Comments:**  
Multiplet interpretation available for spectrum.  
A multiplet interpretation for all major signals in the spectrum could be found. All given impurities could be assigned to regions in the spectrum.

**Signature:**

Automatic analysis generated by Bruker CMC (b:17).  
One or more results have not been created by automatic analysis, or edited manually: marked by '\*'.  
Report generated by Bruker CMC-assist TopSpin 4.1.3 (of 2021-06-28 13:00:50), on 'MacBook-Pro.local' as 'tzbenton'

Compound 28

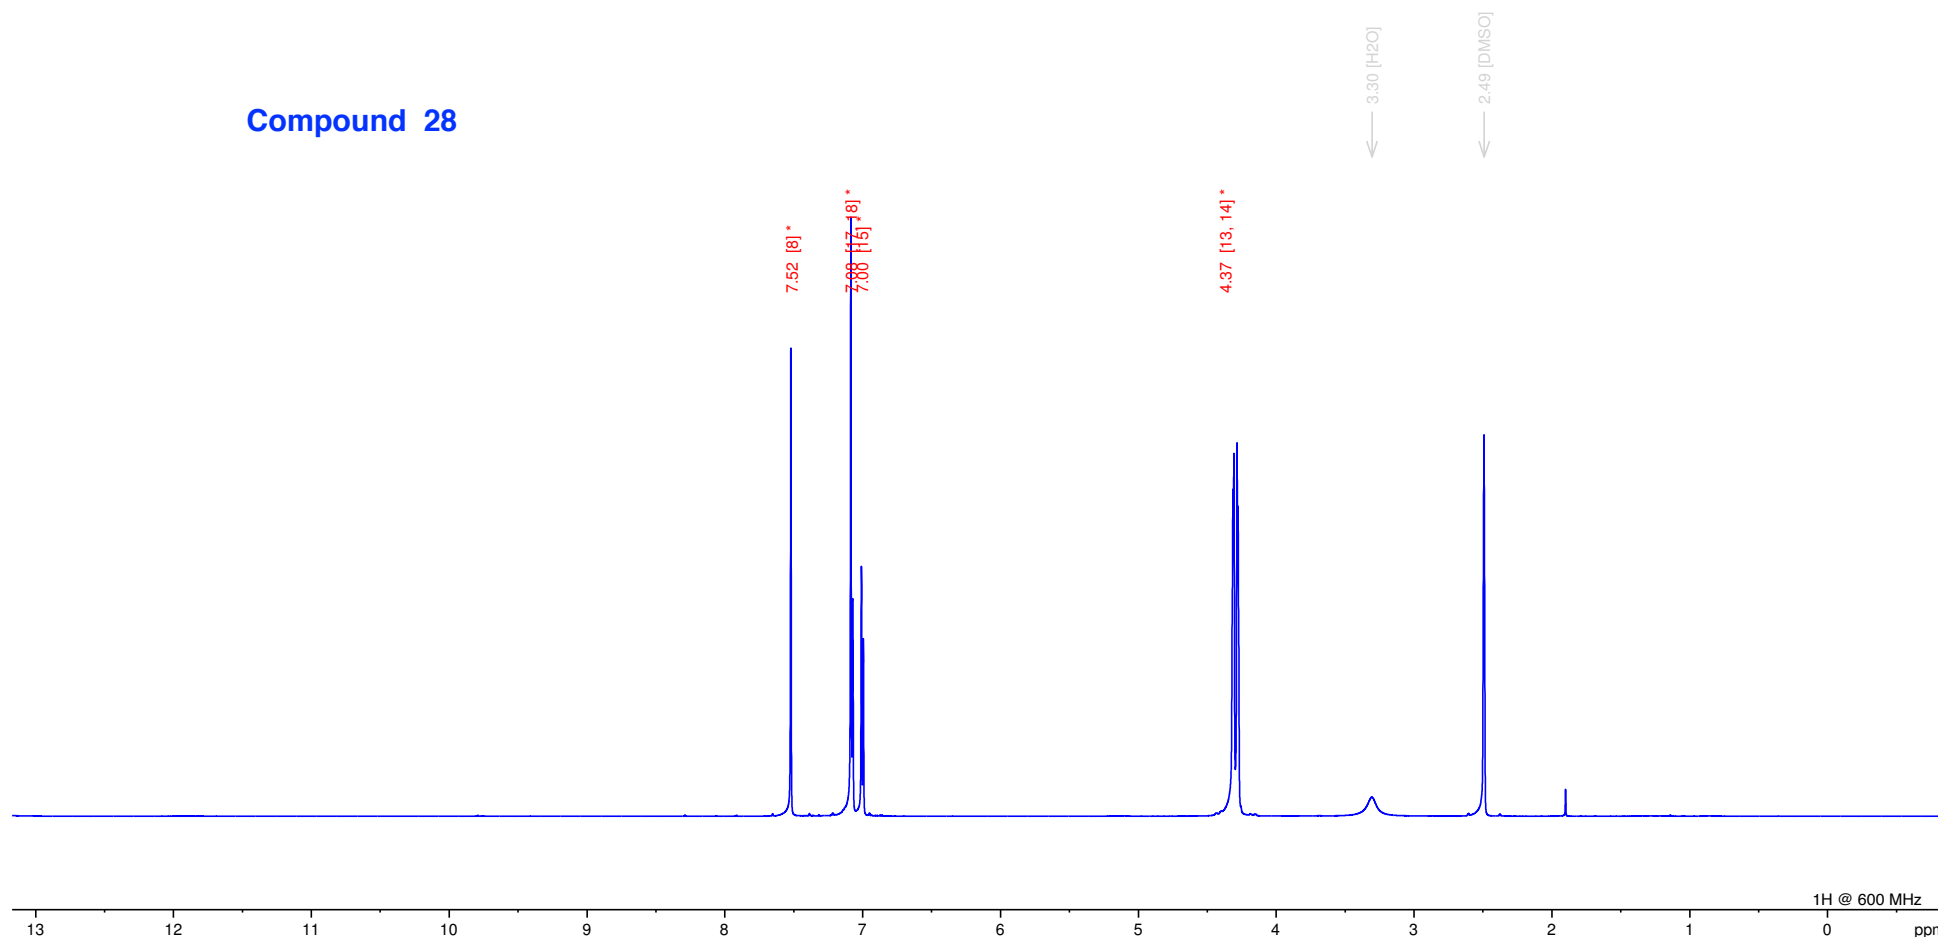

28 (JMT-178)

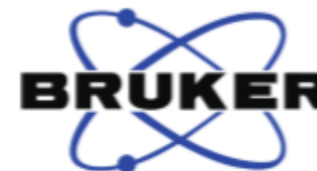

Current Data Parameters  
 NAME CMM210914  
 EXPNO 3  
 PROCNO 1

F2 - Acquisition Parameters  
 Date\_ 20210914  
 Time 11.29  
 INSTRUM spect  
 PROBHD 5 mm PATXI 1H/  
 PULPROG jmod  
 TD 65536  
 SOLVENT DMSO  
 NS 1000  
 DS 4  
 SWH 36057.691 Hz  
 FIDRES 0.550197 Hz  
 AQ 0.9087659 sec  
 RG 2050  
 DW 13.867 usec  
 DE 6.50 usec  
 TE 301.2 K  
 CNST2 145.000000  
 CNST11 1.000000  
 D1 2.00000000 sec  
 D20 0.00689655 sec  
 TD0 1

===== CHANNEL f1 =====  
 SFO1 150.9178988 MHz  
 NUC1 13C  
 P1 11.80 usec  
 P2 23.60 usec  
 PLW1 202.10000610 W

===== CHANNEL f2 =====  
 SFO2 600.1324005 MHz  
 NUC2 1H  
 CPDPRG2 waltz16  
 PCPD2 70.00 usec  
 PLW2 13.69999981 W  
 PLW12 0.17449000 W

F2 - Processing parameters  
 SI 32768  
 SF 150.9028090 MHz  
 WDW EM  
 SSB 0  
 LB 1.00 Hz  
 GB 0  
 PC 1.40

195.90  
 144.29  
 132.24  
 132.22  
 126.73  
 124.86  
 124.84  
 119.62  
 119.60  
 118.67  
 118.65  
 65.01  
 64.46

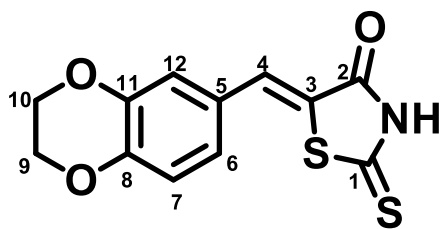

Compound 28

Dimethyl sulfoxide - d<sub>6</sub>

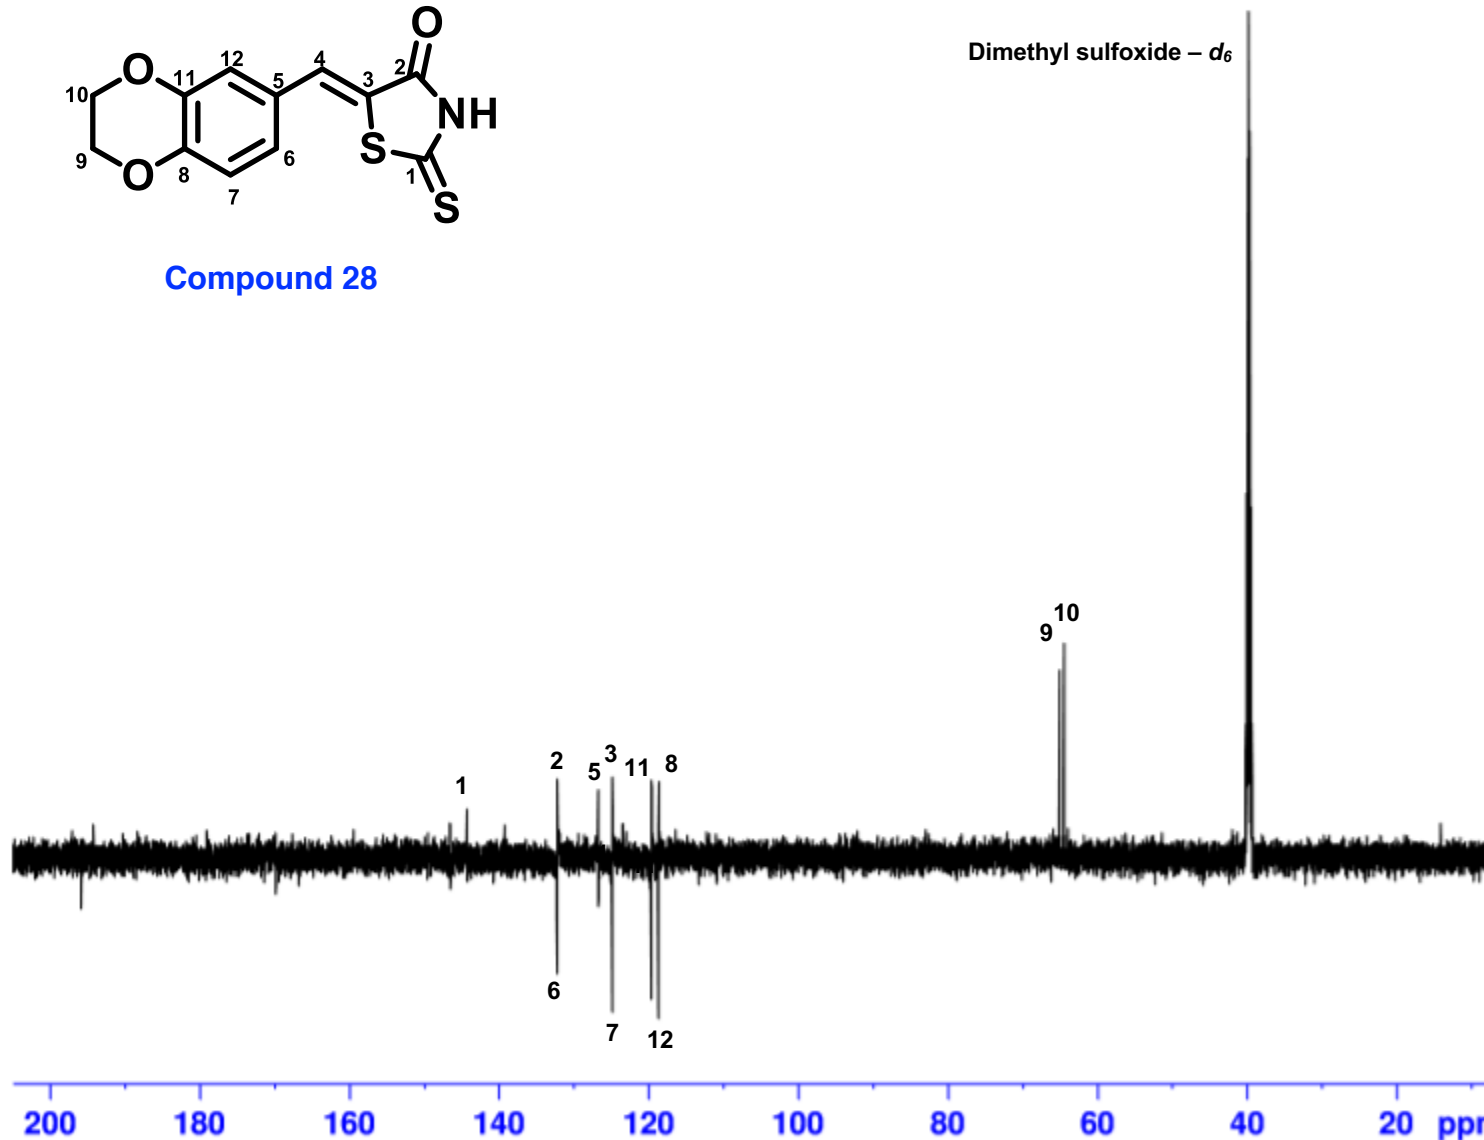



# SAMPLE INFORMATION

|                   |                           |                     |                              |
|-------------------|---------------------------|---------------------|------------------------------|
| Sample Name:      | 178                       | Acquired By:        | System                       |
| Sample Type:      | Unknown                   | Sample Set Name     | 103dx_JMT                    |
| Vial:             | 1:C,2                     | Acq. Method Set:    | ReversePhase_12min_Max Plot  |
| Injection #:      | 1                         | Processing Method:  | ReversePhase_Purity_MAX Plot |
| Injection Volume: | 1.00 ul                   | Channel Name:       | 400.0nm                      |
| Run Time:         | 12.0 Minutes              | Proc. Chnl. Descr.: | PDA 400.0 nm, Smoothed by 7  |
| Date Acquired:    | 7/27/2021 10:13:28 PM EDT |                     |                              |
| Date Processed:   | 8/31/2021 3:33:40 PM EDT  |                     |                              |

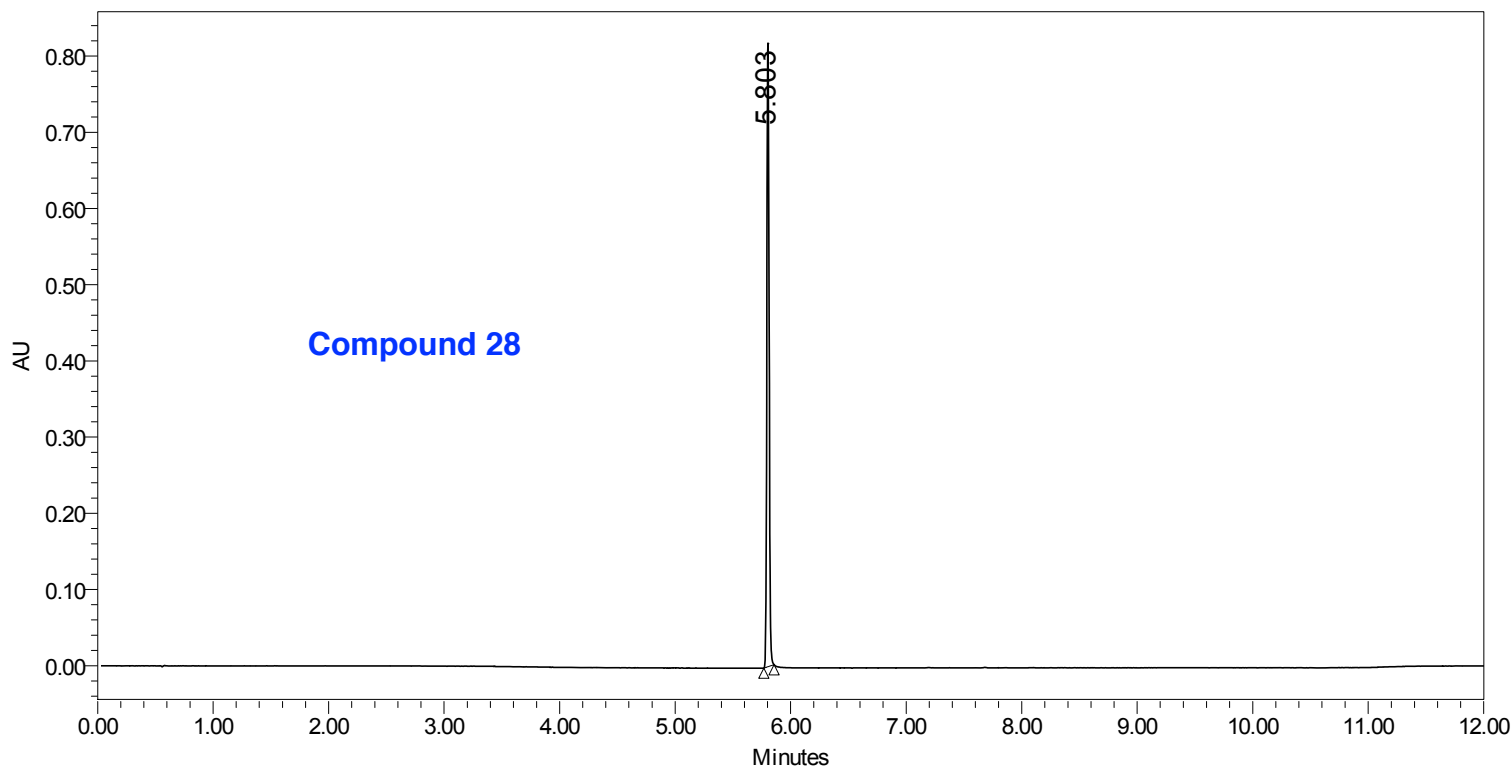

|   | RT    | Area    | % Area | Height | Peak<br>Lambda Max. |
|---|-------|---------|--------|--------|---------------------|
| 1 | 5.803 | 1130101 | 100.00 | 818367 | 397.4               |

CMM210622

Consistency: Unknown\*, unknown  
purity\*

Data set 1H: CMM210622 2 1 /opt/topspin4.1.3  
Structure: /opt/topspin4.1.3/CMM210622/2/structure.mol  
Acquisition date: June 22, 2021 11:08:05 AM EDT  
Solvent: DMSO  
Probe: 5 mm PATXI 1H/D/19F-13C/15N Z-GRD Z855801/0017  
Eretic reference:

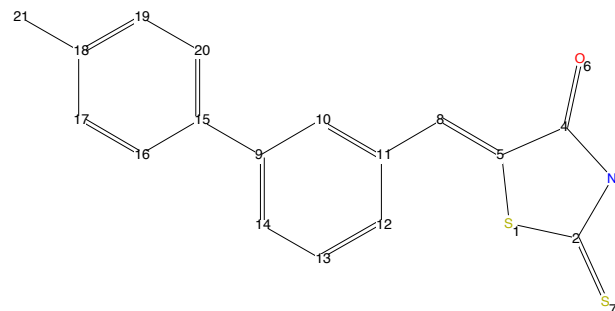

Sum formula:  
C<sub>17</sub>H<sub>13</sub>NOS<sub>2</sub>

Molecular Mass:  
311.04 Da

**Comments:**  
Multiplet interpretation available for spectrum.  
A multiplet interpretation for all major signals in the spectrum could be found. All given impurities could be assigned to regions in the spectrum.

**Signature:**

Automatic analysis generated by Bruker CMC (b:17).  
One or more results have not been created by automatic analysis, or edited manually: marked by '\*'.  
Report generated by Bruker CMC-assist TopSpin 4.1.3 (of 2021-06-28 13:00:50), on 'MacBook-Pro.local' as 'tzbenton'

Compound 29

7.82 [8] \*  
7.65 [10, 12, 13, 16, 20] \*  
7.49 [14] \*  
7.28 [17, 19] \*

3.42 [H<sub>2</sub>O]  
2.47 [DMSO]

2.32 [21] \*

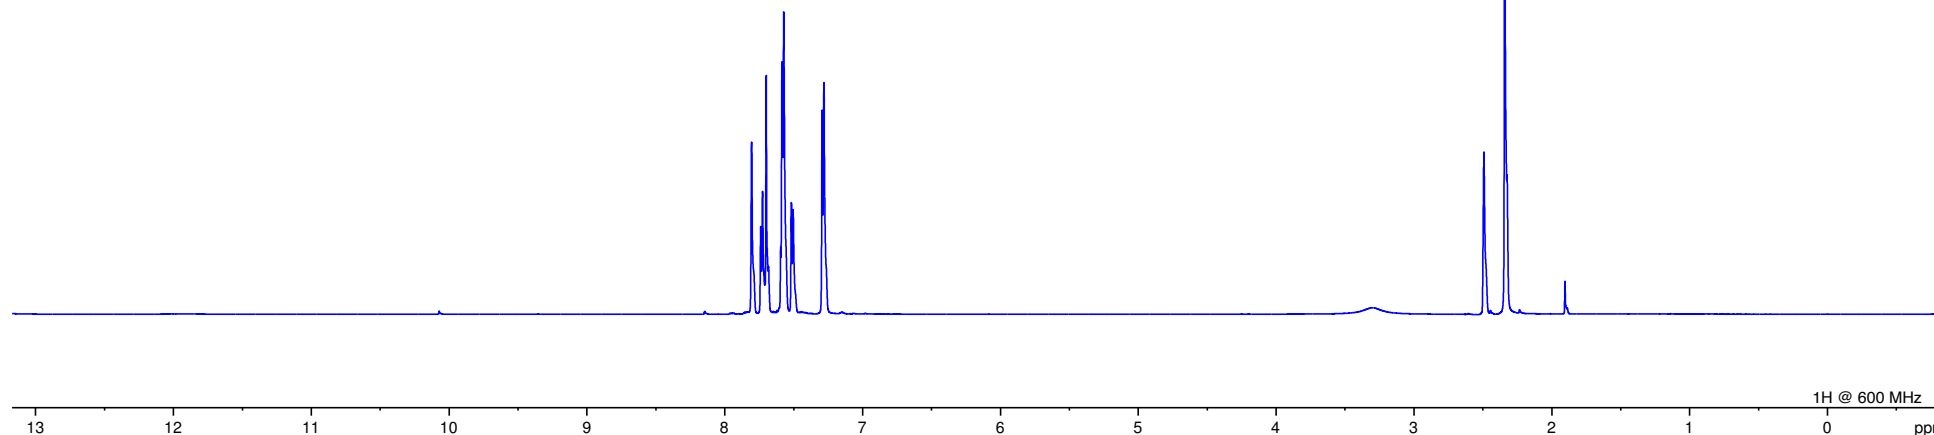

29 (JMT-171)

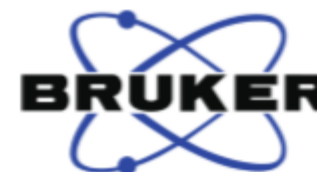

196.13  
169.90  
141.59  
137.93  
136.62  
134.14  
132.10  
130.52  
130.17  
130.08  
129.13  
129.09  
127.07  
126.97  
126.43

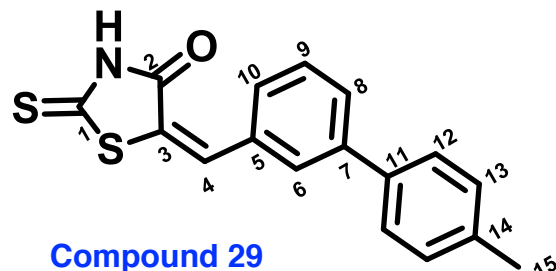

Compound 29

Dimethyl sulfoxide - d<sub>6</sub>

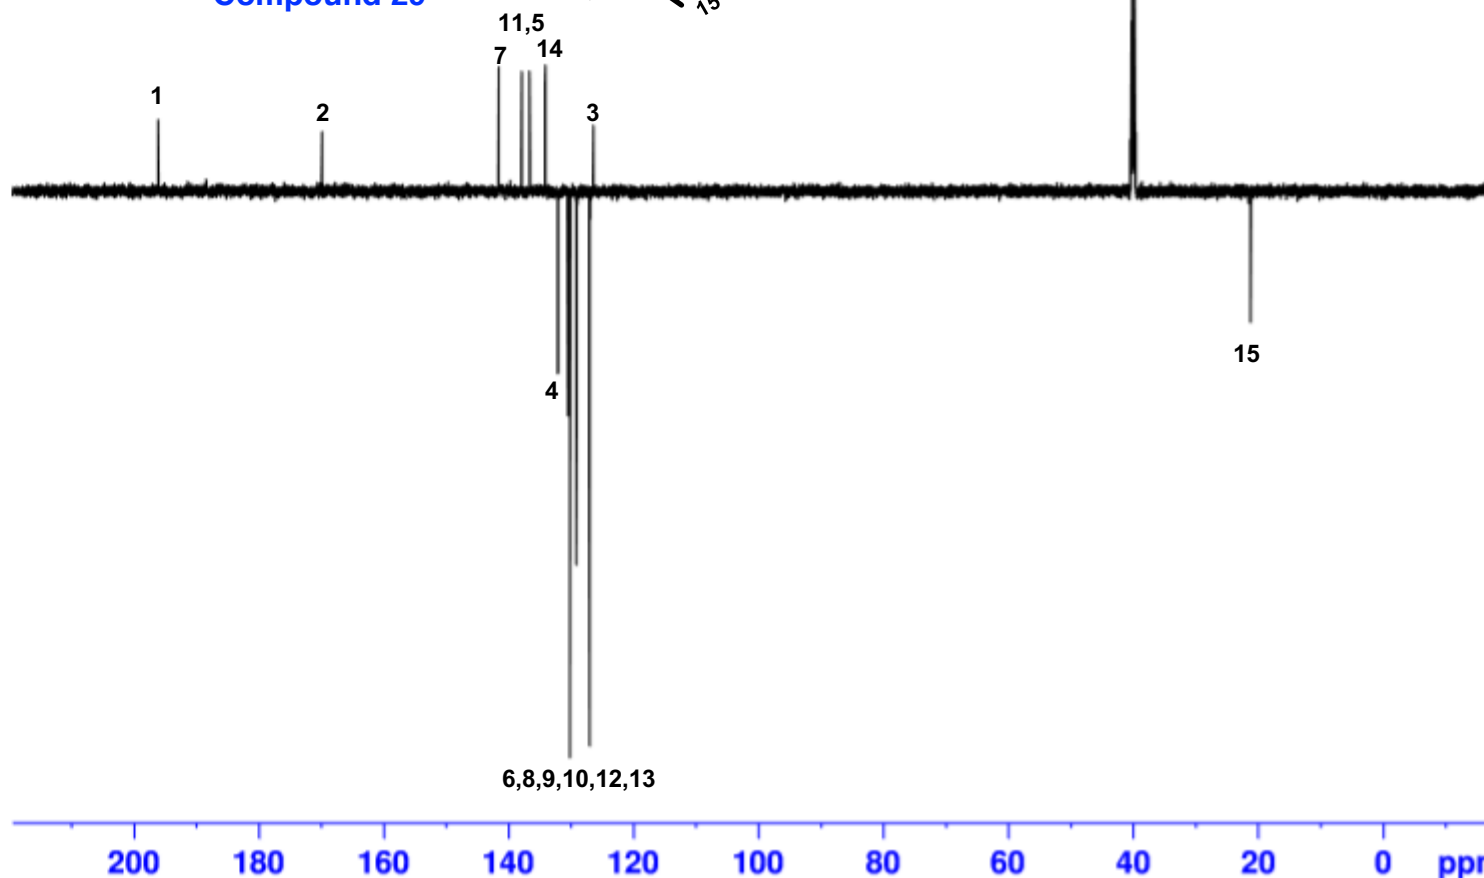

Current Data Parameters  
NAME CMM210914  
EXPNO 8  
PROCNO 1

F2 - Acquisition Parameters  
Date\_ 20210914  
Time 19.24  
INSTRUM spect  
PROBHD 5 mm PATXI 1H/  
PULPROG jmod  
TD 65536  
SOLVENT DMSO  
NS 2000  
DS 4  
SWH 36057.691 Hz  
FIDRES 0.550197 Hz  
AQ 0.9087659 sec  
RG 2050  
DW 13.867 usec  
DE 6.50 usec  
TE 301.4 K  
CNST2 145.0000000  
CNST11 1.0000000  
D1 2.00000000 sec  
D20 0.00689655 sec  
TD0 1

===== CHANNEL f1 =====  
SFO1 150.9178988 MHz  
NUC1 13C  
P1 11.80 usec  
P2 23.60 usec  
PLW1 202.10000610 W

===== CHANNEL f2 =====  
SFO2 600.1324005 MHz  
NUC2 1H  
CPDPRG[2] waltz16  
PCPD2 70.00 usec  
PLW2 13.69999981 W  
PLW12 0.17449000 W

F2 - Processing parameters  
SI 32768  
SF 150.9028090 MHz  
WDW EM  
SSB 0  
LB 1.00 Hz  
GB 0  
PC 1.40

# SAMPLE INFORMATION

|                                          |              |                     |                                 |
|------------------------------------------|--------------|---------------------|---------------------------------|
| Sample Name:                             | 171          | Acquired By:        | System                          |
| Sample Type:                             | Unknown      | Sample Set Name     | 103dx_JMT                       |
| Vial:                                    | 1:C,4        | Acq. Method Set:    | ReversePhase_12min_Max Plot     |
| Injection #:                             | 1            | Processing Method:  | ReversePhase_Purity_MAX Plot    |
| Injection Volume:                        | 1.00 ul      | Channel Name:       | PDA Max Plot 190.0 - 800.0      |
| Run Time:                                | 12.0 Minutes | Proc. Chnl. Descr.: | PDA MaxPlot (190.0 nm to 800.0) |
| Date Acquired: 7/27/2021 10:38:33 PM EDT |              |                     |                                 |
| Date Processed: 8/31/2021 3:19:34 PM EDT |              |                     |                                 |

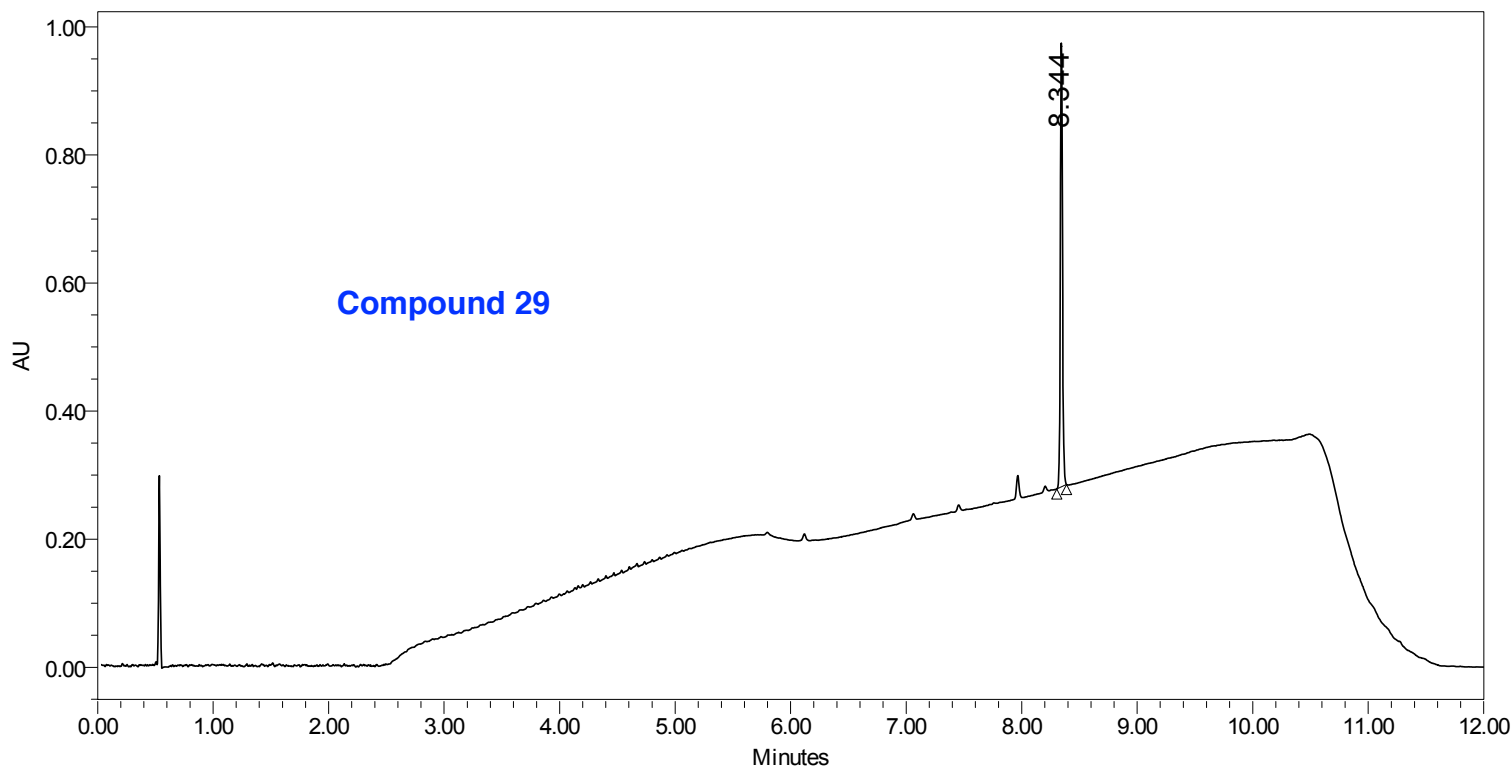

|   | RT    | Area   | % Area | Height | Peak<br>Lambda Max. |
|---|-------|--------|--------|--------|---------------------|
| 1 | 8.344 | 893834 | 100.00 | 694220 | 376.3               |

CMM210623  $\omega$   $\tau$   $\mu$

Consistency: Unknown\*, unknown  
purity\*

Data set 1H: CMM210623 5 1 /opt/topspin4.1.3  
Structure: /opt/topspin4.1.3/CMM210623/5/structure.mol  
Acquisition date: June 23, 2021 1:55:35 PM EDT  
Solvent: DMSO  
Probe: 5 mm PATXI 1H/D/19F-13C/15N Z-GRD Z855801/0017  
Eretic reference:

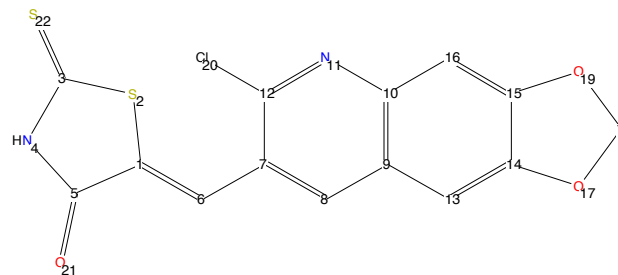

Sum formula:  
C<sub>14</sub>H<sub>7</sub>ClN<sub>2</sub>O<sub>3</sub>S<sub>2</sub>

Molecular Mass:  
349.96 Da

**Comments:**  
Multiplet interpretation available for spectrum.  
A multiplet interpretation for all major signals in the spectrum could be found. All given impurities could be assigned to regions in the spectrum.

**Signature:**

Automatic analysis generated by Bruker CMC (b:17).  
One or more results have not been created by automatic analysis, or edited manually: marked by '\*'.  
Report generated by Bruker CMC-assist TopSpin 4.1.3 (of 2021-06-28 13:00:50), on 'MacBook-Pro.local' as 'tzbenton'

Compound 30

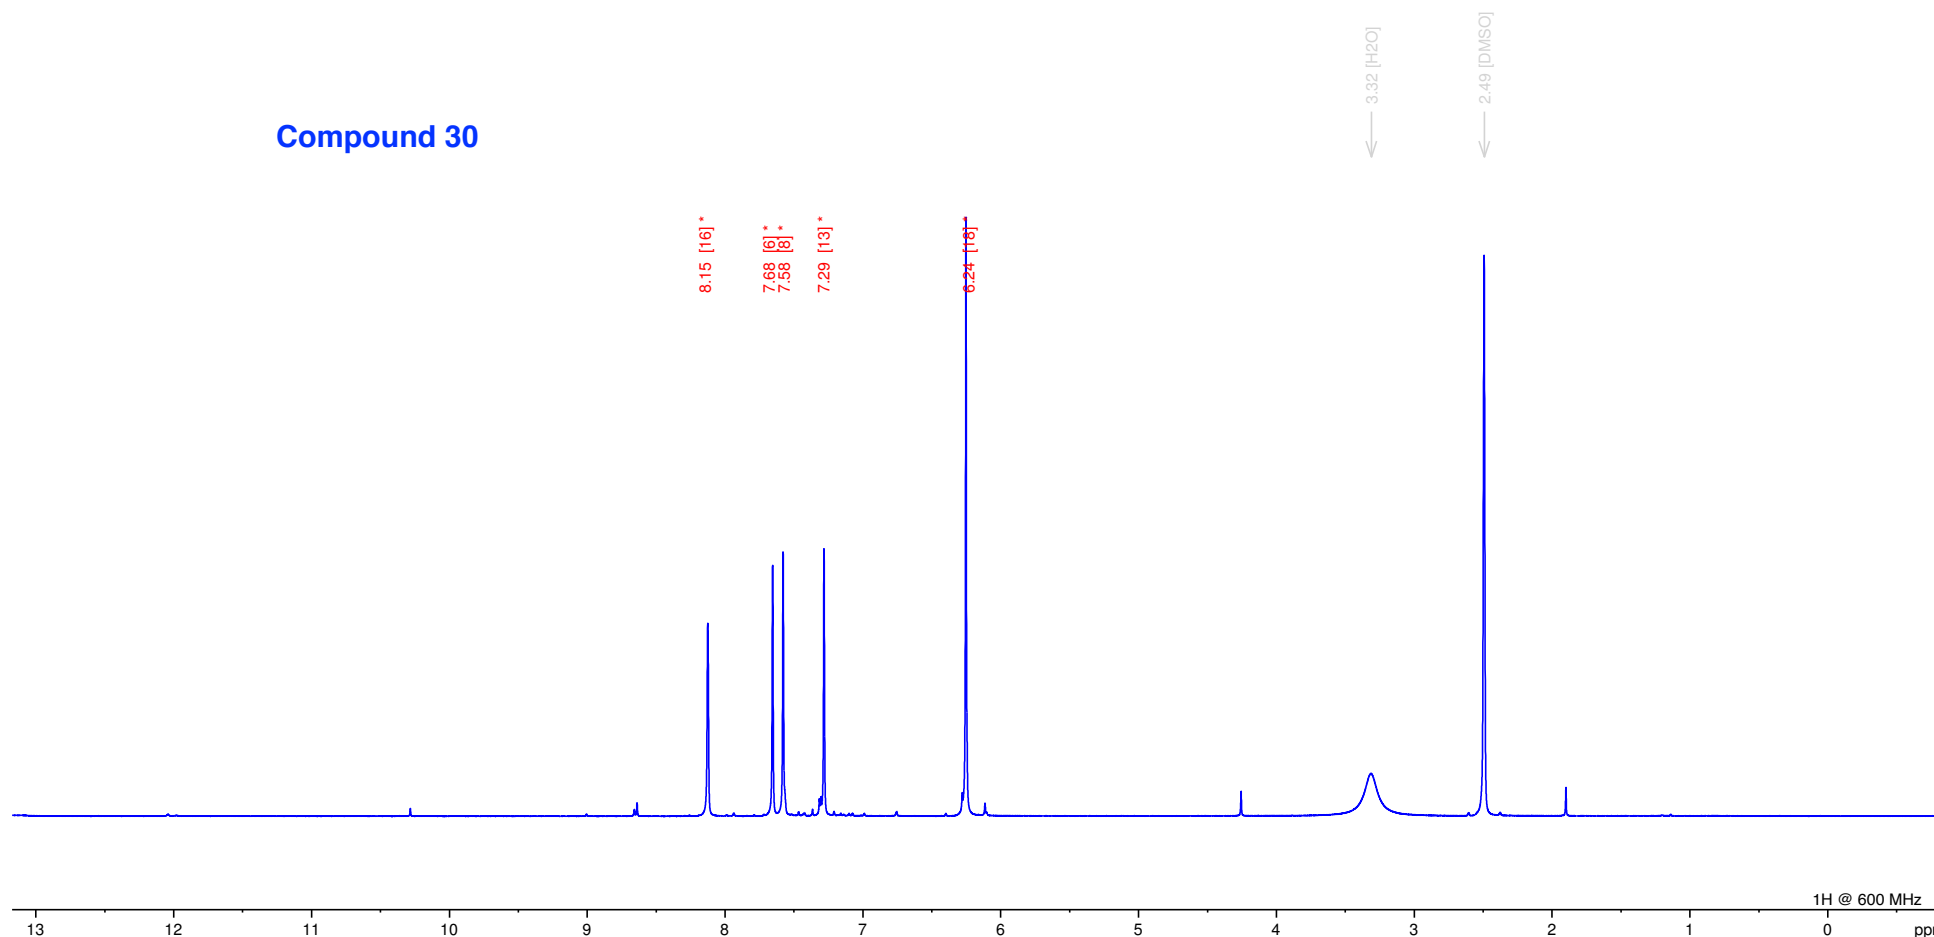



Current Data Parameters  
NAME CMM210916  
EXPNO 7  
PROCNO 1

## F2 - Acquisition Parameters

Date\_ 20210916  
Time 23.05  
INSTRUM spect  
PROBHD 5 mm PATXI 1H/  
PULPROG jmod  
TD 65536  
SOLVENT DMSO  
NS 8000  
DS 4  
SWH 36057.691 Hz  
FIDRES 0.550197 Hz  
AQ 0.9087659 sec  
RG 2050  
DW 13.867 usec  
DE 6.50 usec  
TE 301.4 K  
CNST2 145.000000  
CNST11 1.000000  
D1 2.0000000 sec  
D20 0.00689655 sec  
TD0 1

===== CHANNEL f1 =====  
SFO1 150.9178988 MHz  
NUC1 13C  
P1 11.80 usec  
P2 23.60 usec  
PLW1 202.10000610 W

===== CHANNEL f2 =====  
SFO2 600.1324005 MHz  
NUC2 1H  
PCPDPRG[2] waltz16  
PCPD2 70.00 usec  
PLW2 13.69999981 W  
PLW12 0.17449000 W

## F2 - Processing parameters

SI 32768  
SF 150.9028090 MHz  
WDW EM  
SSB 0  
LB 1.00 Hz  
GB 0  
PC 1.40

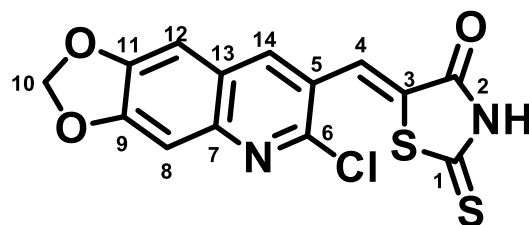

Compound 30

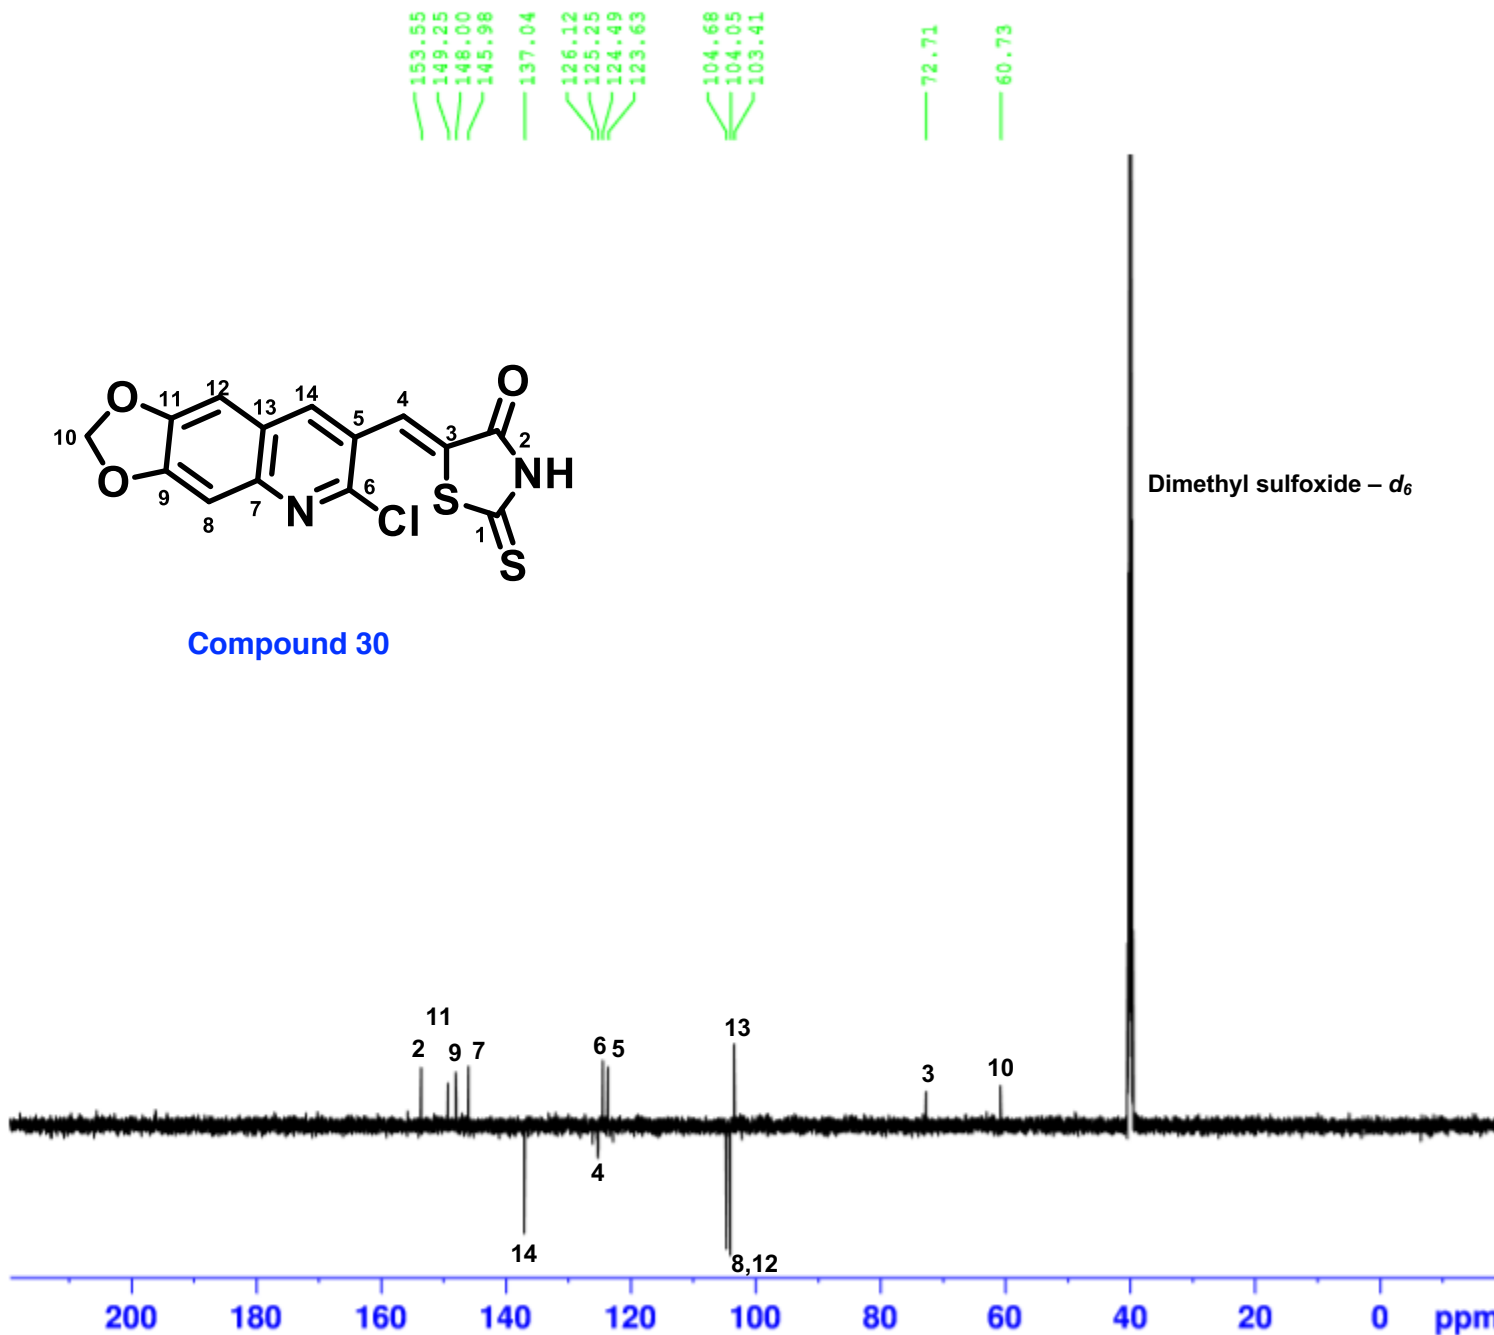

# SAMPLE INFORMATION

|                   |                           |                     |                                 |
|-------------------|---------------------------|---------------------|---------------------------------|
| Sample Name:      | 132                       | Acquired By:        | System                          |
| Sample Type:      | Unknown                   | Sample Set Name     | 103dx_JMT                       |
| Vial:             | 1:B,4                     | Acq. Method Set:    | ReversePhase_12min_Max Plot     |
| Injection #:      | 1                         | Processing Method:  | ReversePhase_Purity_MAX Plot    |
| Injection Volume: | 3.00 ul                   | Channel Name:       | PDA Max Plot 190.0 - 800.0      |
| Run Time:         | 12.0 Minutes              | Proc. Chnl. Descr.: | PDA MaxPlot (190.0 nm to 800.0) |
|                   |                           |                     |                                 |
| Date Acquired:    | 7/28/2021 12:10:19 PM EDT |                     |                                 |
| Date Processed:   | 8/31/2021 3:29:13 PM EDT  |                     |                                 |

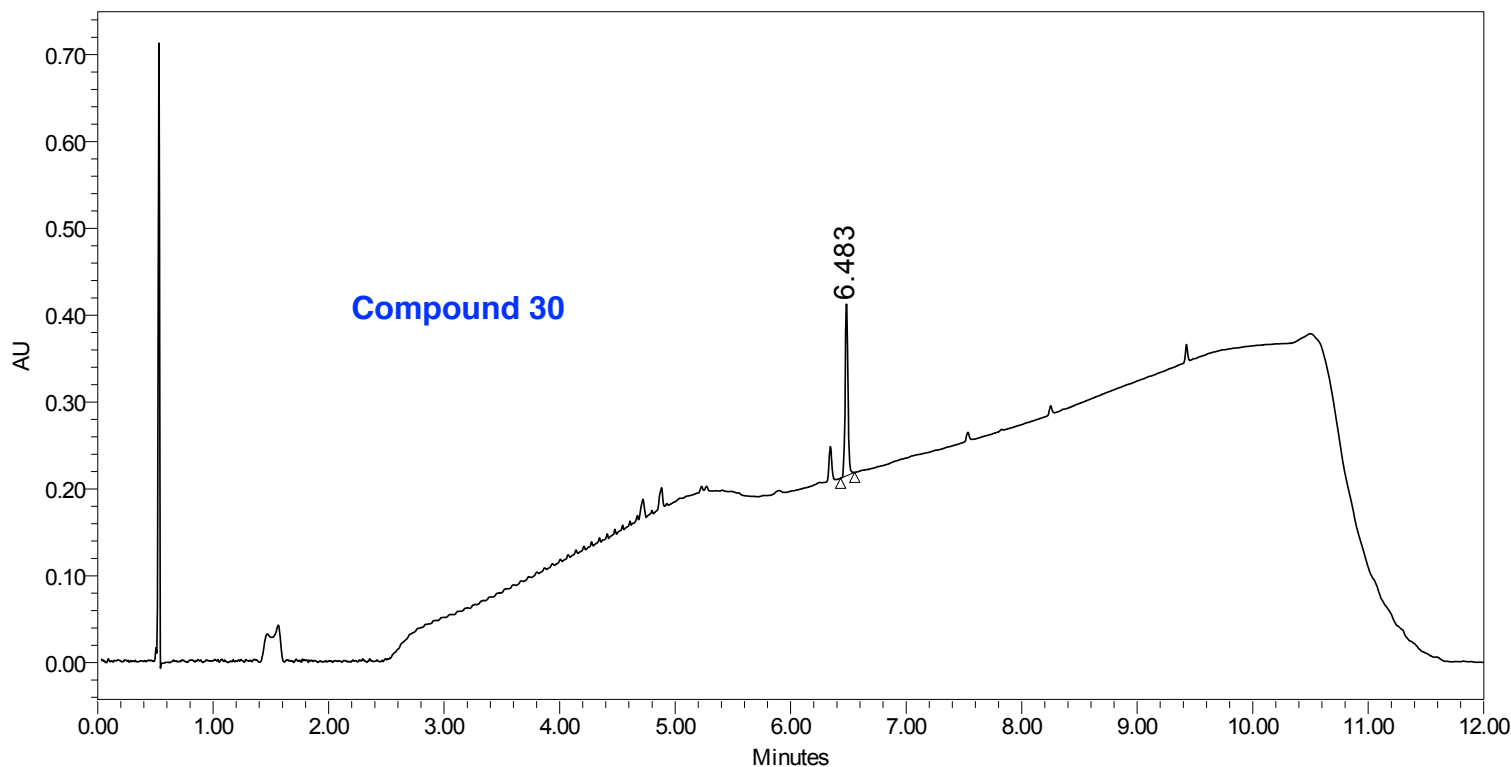

|   | RT    | Area   | % Area | Height | Peak<br>Lambda Max. |
|---|-------|--------|--------|--------|---------------------|
| 1 | 6.483 | 331432 | 100.00 | 197687 | 396.2               |

**Consistency: Unknown\*, unknown**

Data set 1H: CMM210618 4 1 /opt/topspin4.1.3  
Structure: /opt/topspin4.1.3/CMM210618/4/structure.mol  
Acquisition date: June 18, 2021 3:25:08 PM EDT  
Solvent: DMSO  
Probe: 5 mm PATXI 1H/D/19F-13C/15N Z-GRD Z855801/0017  
Eretic reference:

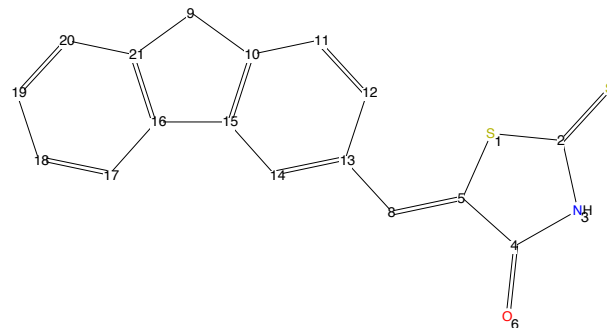

Sum formula:  
 $C_{17}H_{11}NOS_2$

Molecular Mass:  
309.03 Da

**Comments:**

Multiplier interpretation available for spectrum.  
A multiplier interpretation for all major signals in the spectrum could be found. All given impurities could be assigned to regions in the spectrum.

**Signature:**

Automatic analysis generated by Bruker CMC (b:17).

One or more results have not been created by automatic analysis, or edited manually: marked by '\*':

Report generated by Bruker CMC-assist TopSpin 4.1.3 (of 2021-06-28 13:00:50),  
on 'MacBook-Pro.local' as 'tzbenton'

## Compound 31

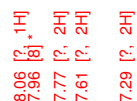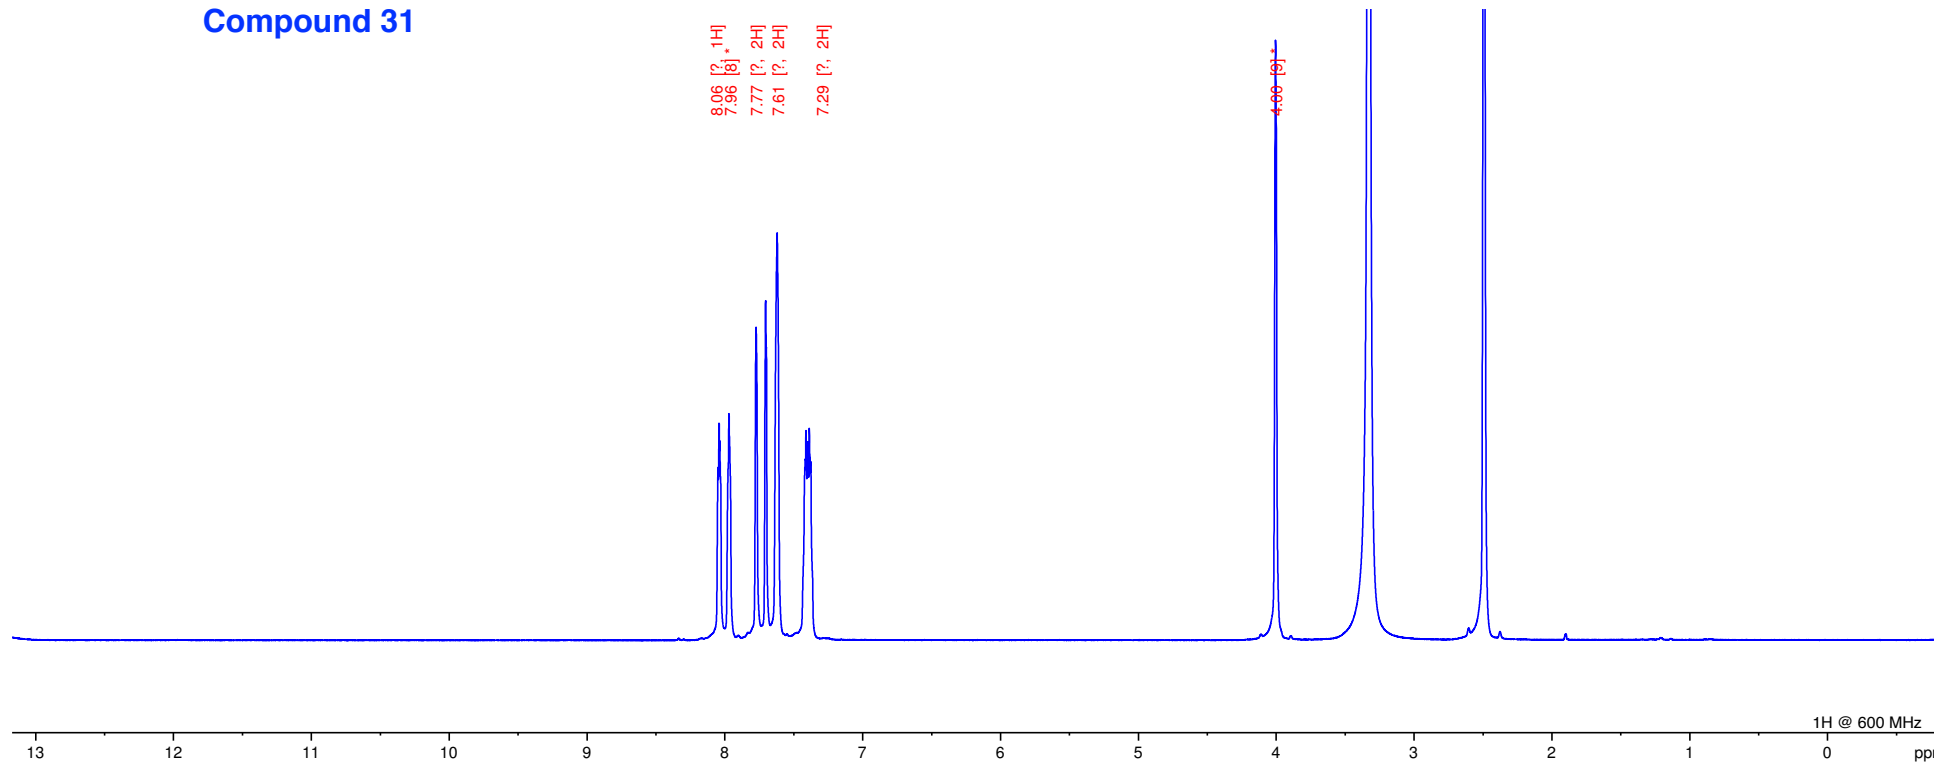



31 (JMT-165)

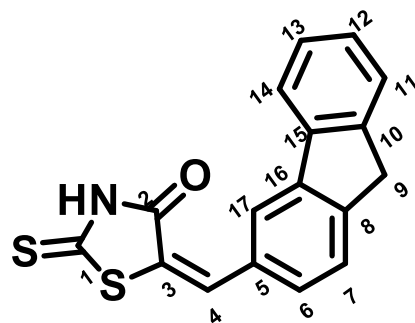

Compound 31

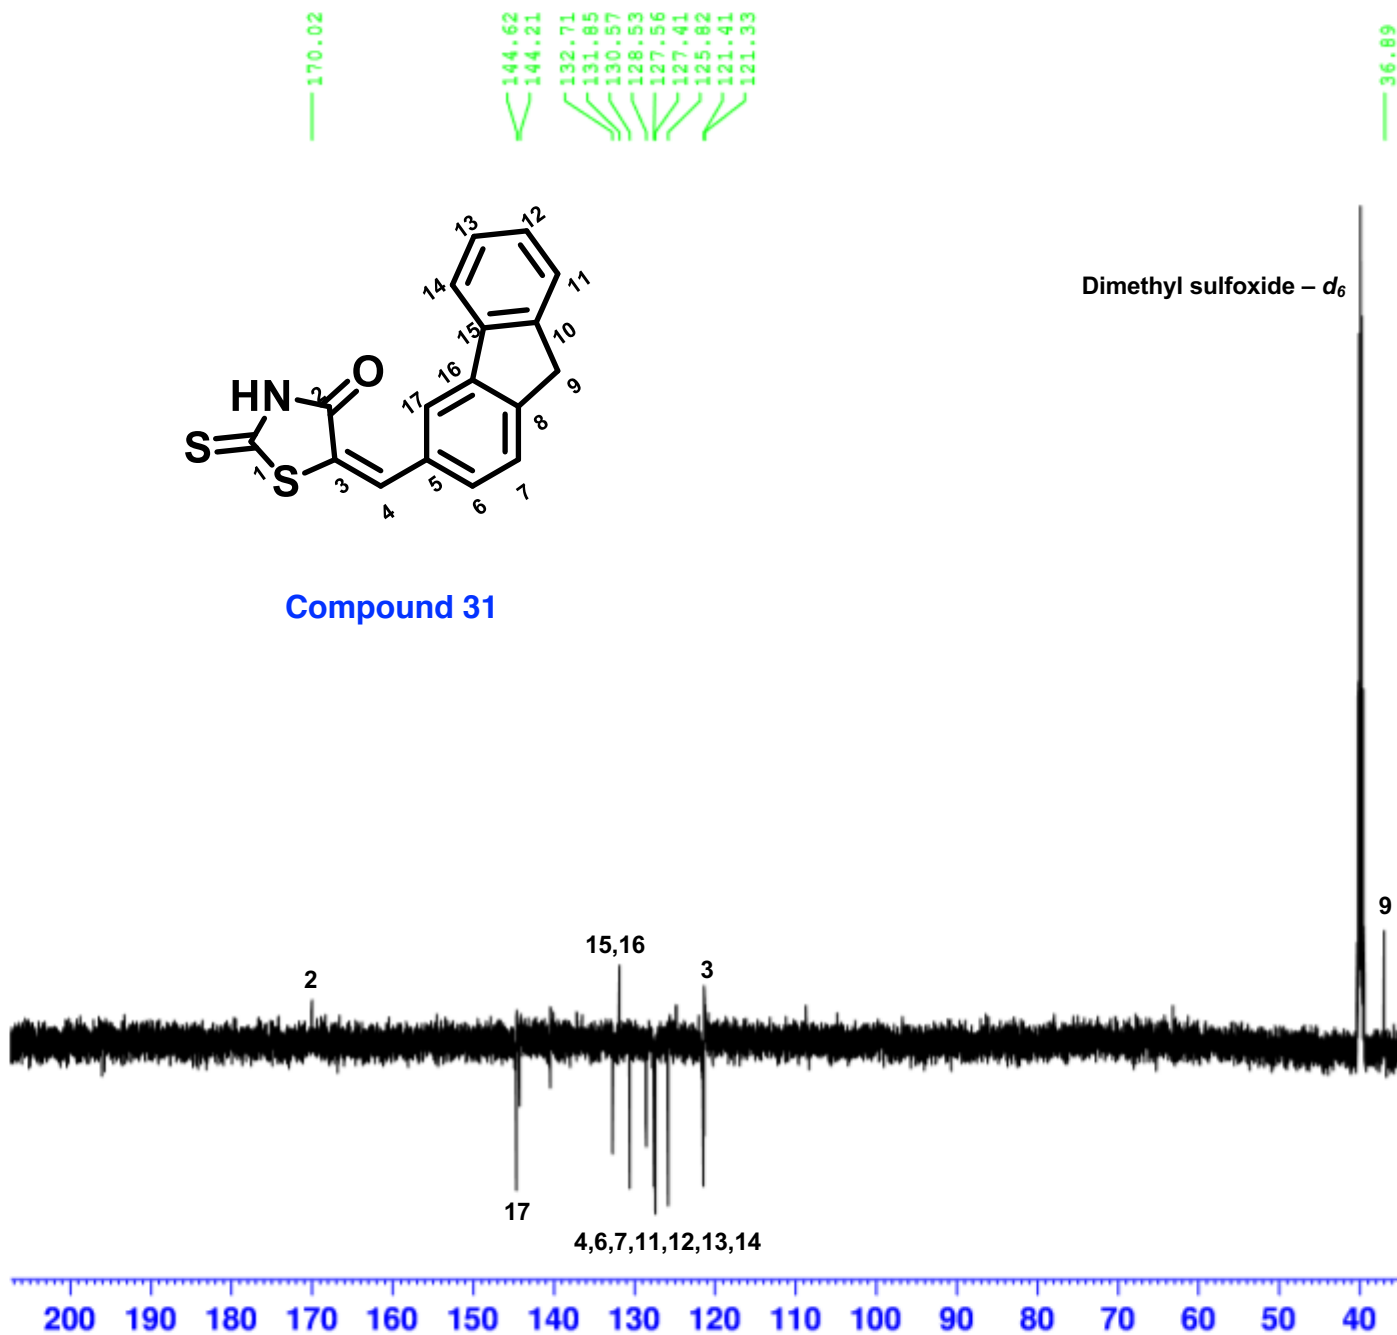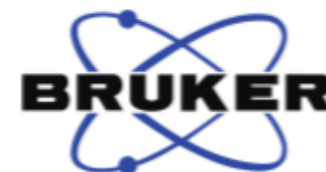

Current Data Parameters  
NAME CMM210915  
EXPNO 1  
PROCNO 1

F2 - Acquisition Parameters  
Date\_ 20210915  
Time 9.27  
INSTRUM spect  
PROBHD 5 mm PATXI 1H/  
PULPROG jmod  
TD 65536  
SOLVENT DMSO  
NS 1000  
DS 4  
SWH 36057.691 Hz  
FIDRES 0.550197 Hz  
AQ 0.9087659 sec  
RG 2050  
DW 13.867 usec  
DE 6.50 usec  
TE 301.2 K  
CNST2 145.0000000  
CNST11 1.0000000  
D1 2.00000000 sec  
D20 0.00689655 sec  
TD0 1

===== CHANNEL f1 =====  
SFO1 150.9178988 MHz  
NUC1 13C  
P1 11.80 usec  
P2 23.60 usec  
PLW1 202.10000610 W

===== CHANNEL f2 =====  
SFO2 600.1324005 MHz  
NUC2 1H  
CPDPRG[2] waltz16  
PCPD2 70.00 usec  
PLW2 13.69999981 W  
PLW12 0.17449000 W

F2 - Processing parameters  
SI 262144  
SF 150.9028090 MHz  
WDW EM  
SSB 0  
LB 1.00 Hz  
GB 0  
PC 1.40

# SAMPLE INFORMATION

|                   |                          |                     |                                |
|-------------------|--------------------------|---------------------|--------------------------------|
| Sample Name:      | 165                      | Acquired By:        | System                         |
| Sample Type:      | Unknown                  | Sample Set Name     | 103dx_JMT                      |
| Vial:             | 1:B,8                    | Acq. Method Set:    | ReversePhase_12min_Max Plot    |
| Injection #:      | 1                        | Processing Method:  | ReversePhase_Purity_MAX Plot   |
| Injection Volume: | 1.00 ul                  | Channel Name:       | PDA Max Plot 190.0 - 800.0     |
| Run Time:         | 12.0 Minutes             | Proc. Chnl. Descr.: | PDA MaxPlot (190.0 nm to 800.0 |
| Date Acquired:    | 7/27/2021 9:48:22 PM EDT |                     |                                |
| Date Processed:   | 8/31/2021 3:39:41 PM EDT |                     |                                |

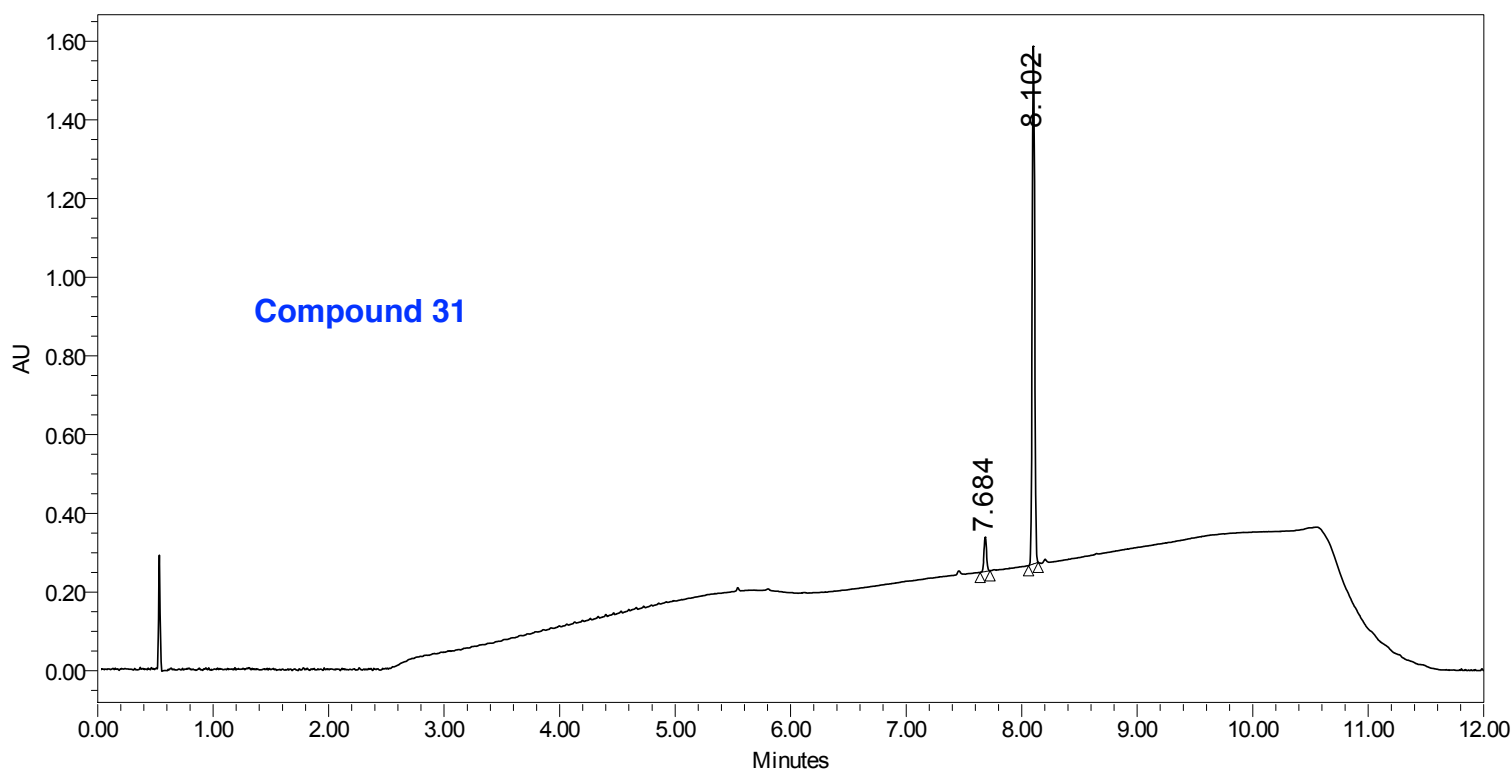

|   | RT    | Area    | % Area | Height  | Peak<br>Lambda Max. |
|---|-------|---------|--------|---------|---------------------|
| 1 | 7.684 | 133736  | 6.44   | 87393   | 412.4               |
| 2 | 8.102 | 1943048 | 93.56  | 1316459 | 406.8               |

CMM210212

TZB-006

Consistency: Unknown\*, unknown  
purity\*

Data set 1H: CMM210212 2 1 /opt/topspin4.1.3  
Structure: /opt/topspin4.1.3/CMM210212/2/structure.mol  
Acquisition date: February 12, 2021 9:13:01 AM EST  
Solvent: DMSO  
Probe: 5 mm PATXI 1H/D/19F-13C/15N Z-GRD Z855801/0017  
Eretic reference:

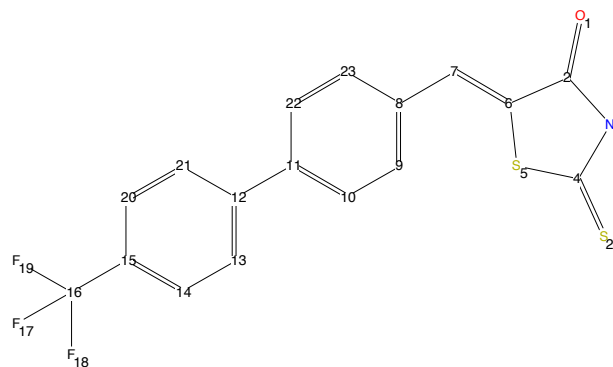

Sum formula:  
C<sub>17</sub>H<sub>10</sub>F<sub>3</sub>NOS<sub>2</sub>

Molecular Mass:  
365.02 Da

**Comments:**  
Multiplet interpretation available for spectrum.  
A multiplet interpretation for all major signals in the spectrum could be found. All given impurities could be assigned to regions in the spectrum.

**Signature:**

Automatic analysis generated by Bruker CMC (b:17).  
One or more results have not been created by automatic analysis, or edited manually: marked by '\*'.  
Report generated by Bruker CMC-assist TopSpin 4.1.3 (of 2021-06-28 13:00:50), on 'MacBook-Pro.local' as 'tzbenton'

Compound 32

7.84 [14, 20, 10, 22, 23, 9, 7]\*

3.32 [H<sub>2</sub>O]

2.51 [DMSO]

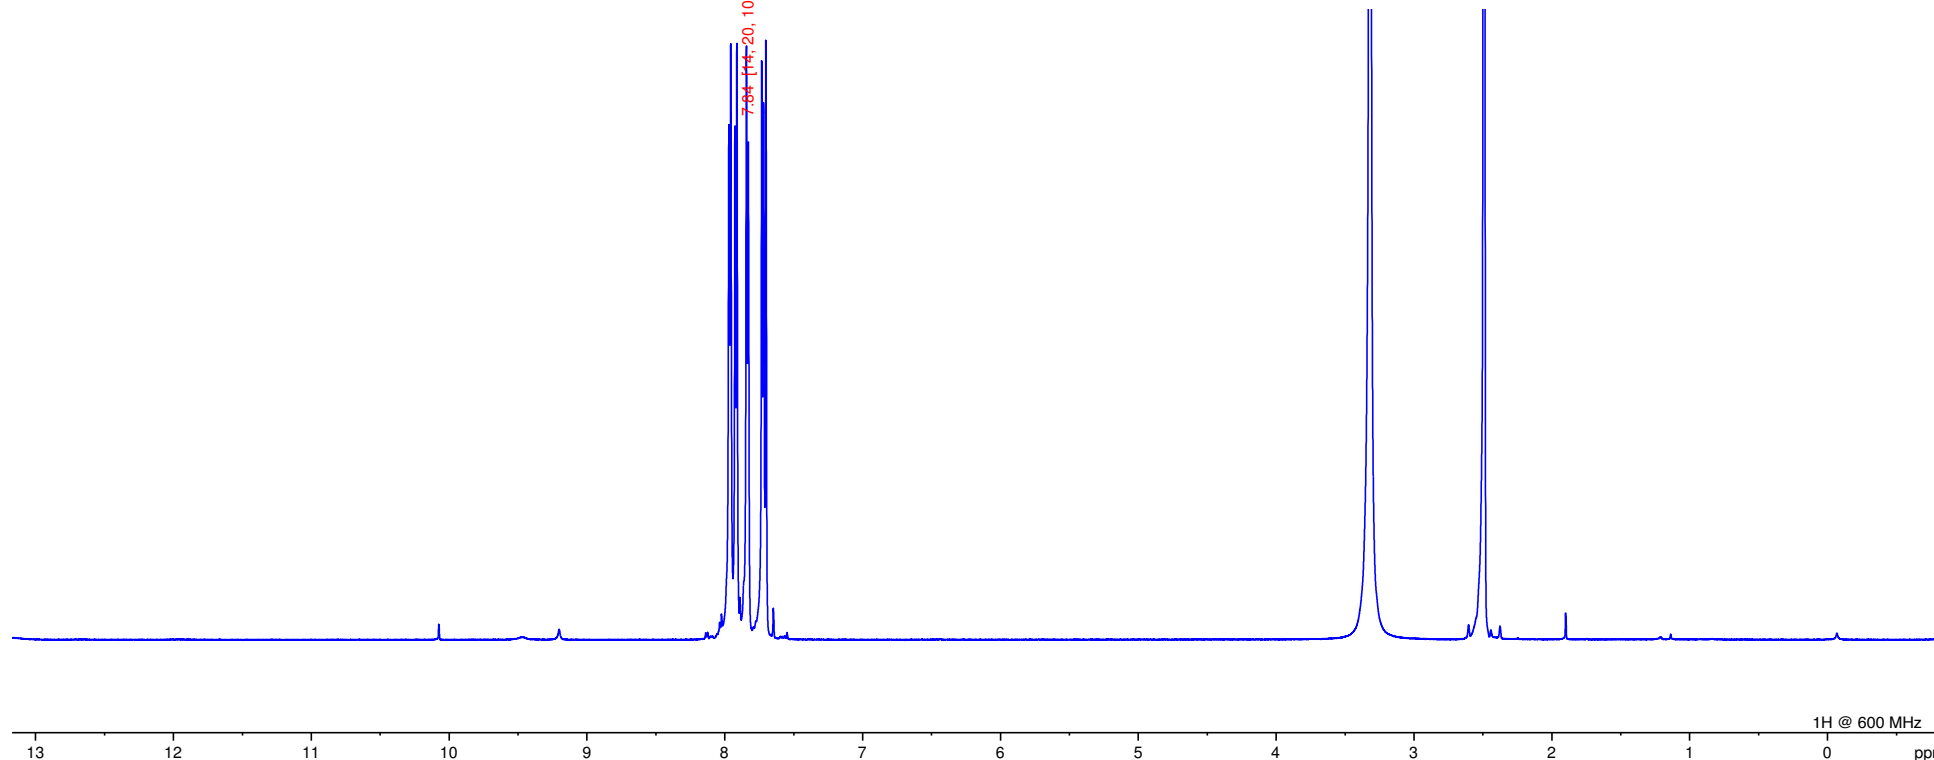

1H @ 600 MHz  
ppm

103dx-006

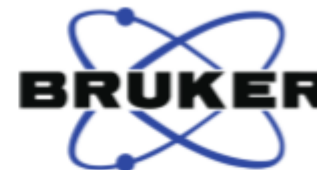

Current Data Parameters  
 NAME CMM210914  
 EXPNO 1  
 PROCNO 1

F2 - Acquisition Parameters  
 Date\_ 20210914  
 Time 9.33  
 INSTRUM spect  
 PROBHD 5 mm PATXI 1H/  
 PULPROG jmod  
 TD 65536  
 SOLVENT Acetone  
 NS 2000  
 DS 4  
 SWH 36057.691 Hz  
 FIDRES 0.550197 Hz  
 AQ 0.9087659 sec  
 RG 2050  
 DW 13.867 usec  
 DE 6.50 usec  
 TE 301.4 K  
 CNST2 145.0000000  
 CNST11 1.0000000  
 D1 2.0000000 sec  
 D20 0.00689655 sec  
 TD0 1

===== CHANNEL f1 =====  
 SFO1 150.9178988 MHz  
 NUC1 13C  
 P1 11.80 usec  
 P2 23.60 usec  
 PLW1 202.10000610 W

===== CHANNEL f2 =====  
 SFO2 600.1324005 MHz  
 NUC2 1H  
 CPDPRG[2] waltz16  
 PCPD2 70.00 usec  
 PLW2 13.69999981 W  
 PLW12 0.17449000 W

F2 - Processing parameters  
 SI 32768  
 SF 150.9028090 MHz  
 WDW EM  
 SSB 0  
 LB 1.00 Hz  
 GB 0  
 PC 1.40

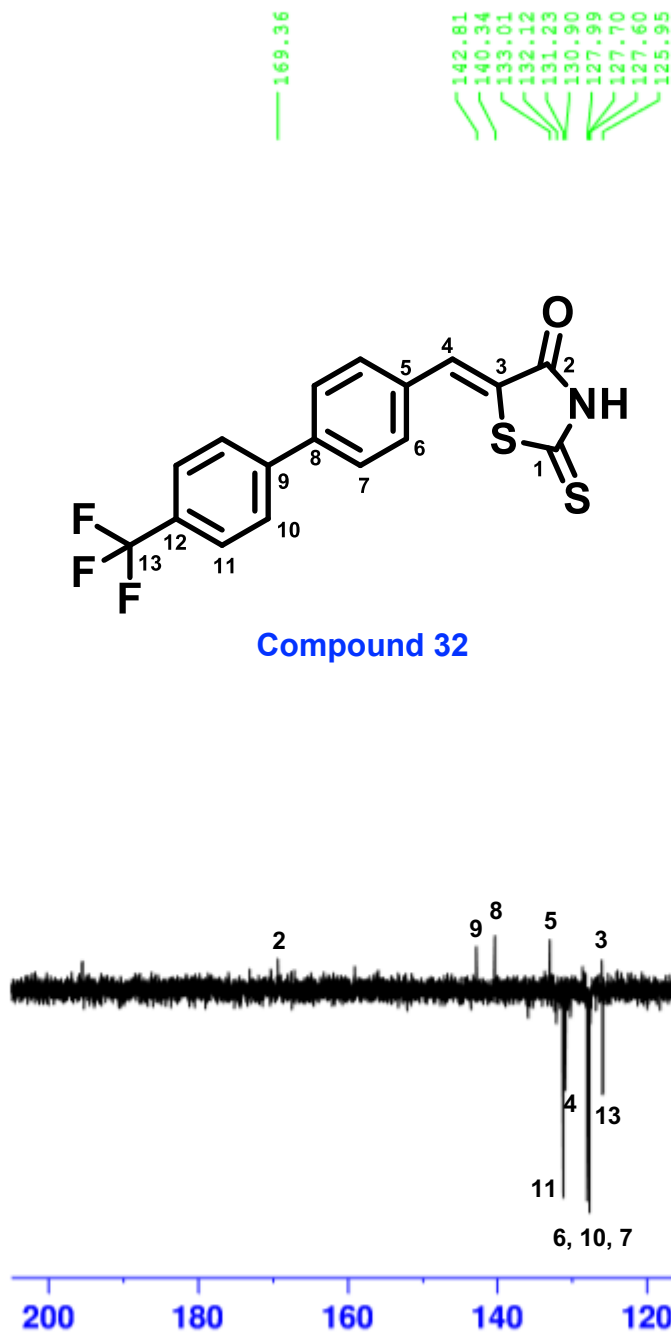

Dimethyl sulfoxide - d<sub>6</sub>

# SAMPLE INFORMATION

|                                          |                        |                     |                                |
|------------------------------------------|------------------------|---------------------|--------------------------------|
| Sample Name:                             | 2021Feb08_TZB103dx_006 | Acquired By:        | System                         |
| Sample Type:                             | Unknown                | Sample Set Name     | TZB_103dx                      |
| Vial:                                    | 1:F,2                  | Acq. Method Set:    | ReversePhase_12min_Max Plot    |
| Injection #:                             | 1                      | Processing Method:  | ReversePhase_Purity_MAX Plot   |
| Injection Volume:                        | 1.00 ul                | Channel Name:       | PDA Max Plot 190.0 - 800.0     |
| Run Time:                                | 12.0 Minutes           | Proc. Chnl. Descr.: | PDA MaxPlot (190.0 nm to 800.0 |
| Date Acquired: 2/8/2021 2:19:18 PM EST   |                        |                     |                                |
| Date Processed: 8/31/2021 3:49:53 PM EDT |                        |                     |                                |

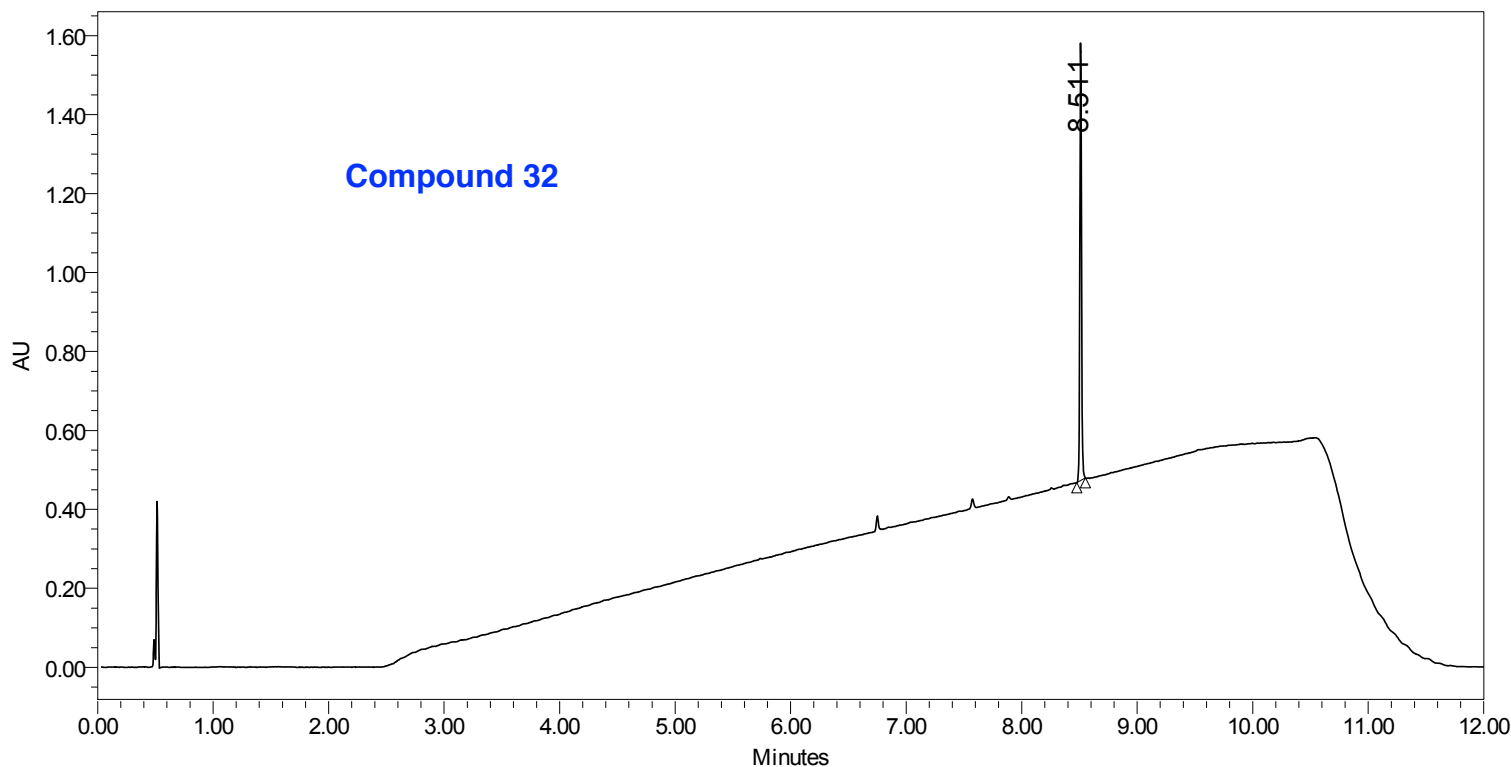

|   | RT    | Area    | % Area | Height  | Peak<br>Lambda Max. |
|---|-------|---------|--------|---------|---------------------|
| 1 | 8.511 | 1165347 | 100.00 | 1112283 | 383.7               |

CMM210212

Consistency: Unknown\*, unknown  
purity\*

Data set 1H: CMM210212 3 1 /opt/topspin4.1.3  
Structure: /opt/topspin4.1.3/CMM210212/3/structure.mol  
Acquisition date: February 12, 2021 9:18:02 AM EST  
Solvent: DMSO  
Probe: 5 mm PATXI 1H/D/19F-13C/15N Z-GRD Z855801/0017  
Eretic reference:

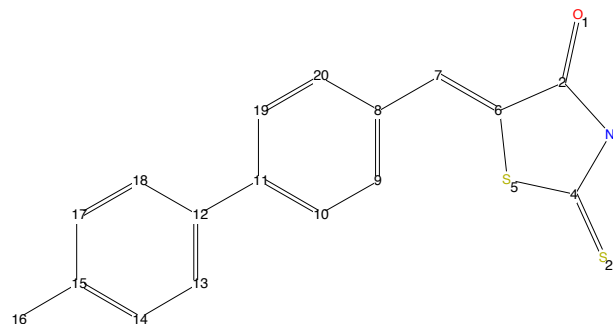

Sum formula:  
C<sub>17</sub>H<sub>13</sub>NOS<sub>2</sub>

Molecular Mass:  
311.04 Da

**Comments:**  
Multiplet interpretation available for spectrum. Multiplet interpretation available for spectrum.  
A multiplet interpretation for all major signals in the spectrum could be found. All given impurities could be assigned to regions in the spectrum. A multiplet interpretation for all major signals in the spectrum could be found. All given impurities could be assigned to regions in the spectrum.

**Signature:**

Automatic analysis generated by Bruker CMC (b:17).  
One or more results have not been created by automatic analysis, or edited manually: marked by '\*'.  
Report generated by Bruker CMC-assist TopSpin 4.1.3 (of 2021-06-28 13:00:50), on 'MacBook-Pro.local' as 'tzbenton'

Compound 33

7.85 [20, 9] \*  
7.64 [7, 13, 18, 19, 10] \*  
7.31 [14, 17] \*

3.36 [H<sub>2</sub>O]  
2.49 [DMSO]  
2.36 [4, 6] \*

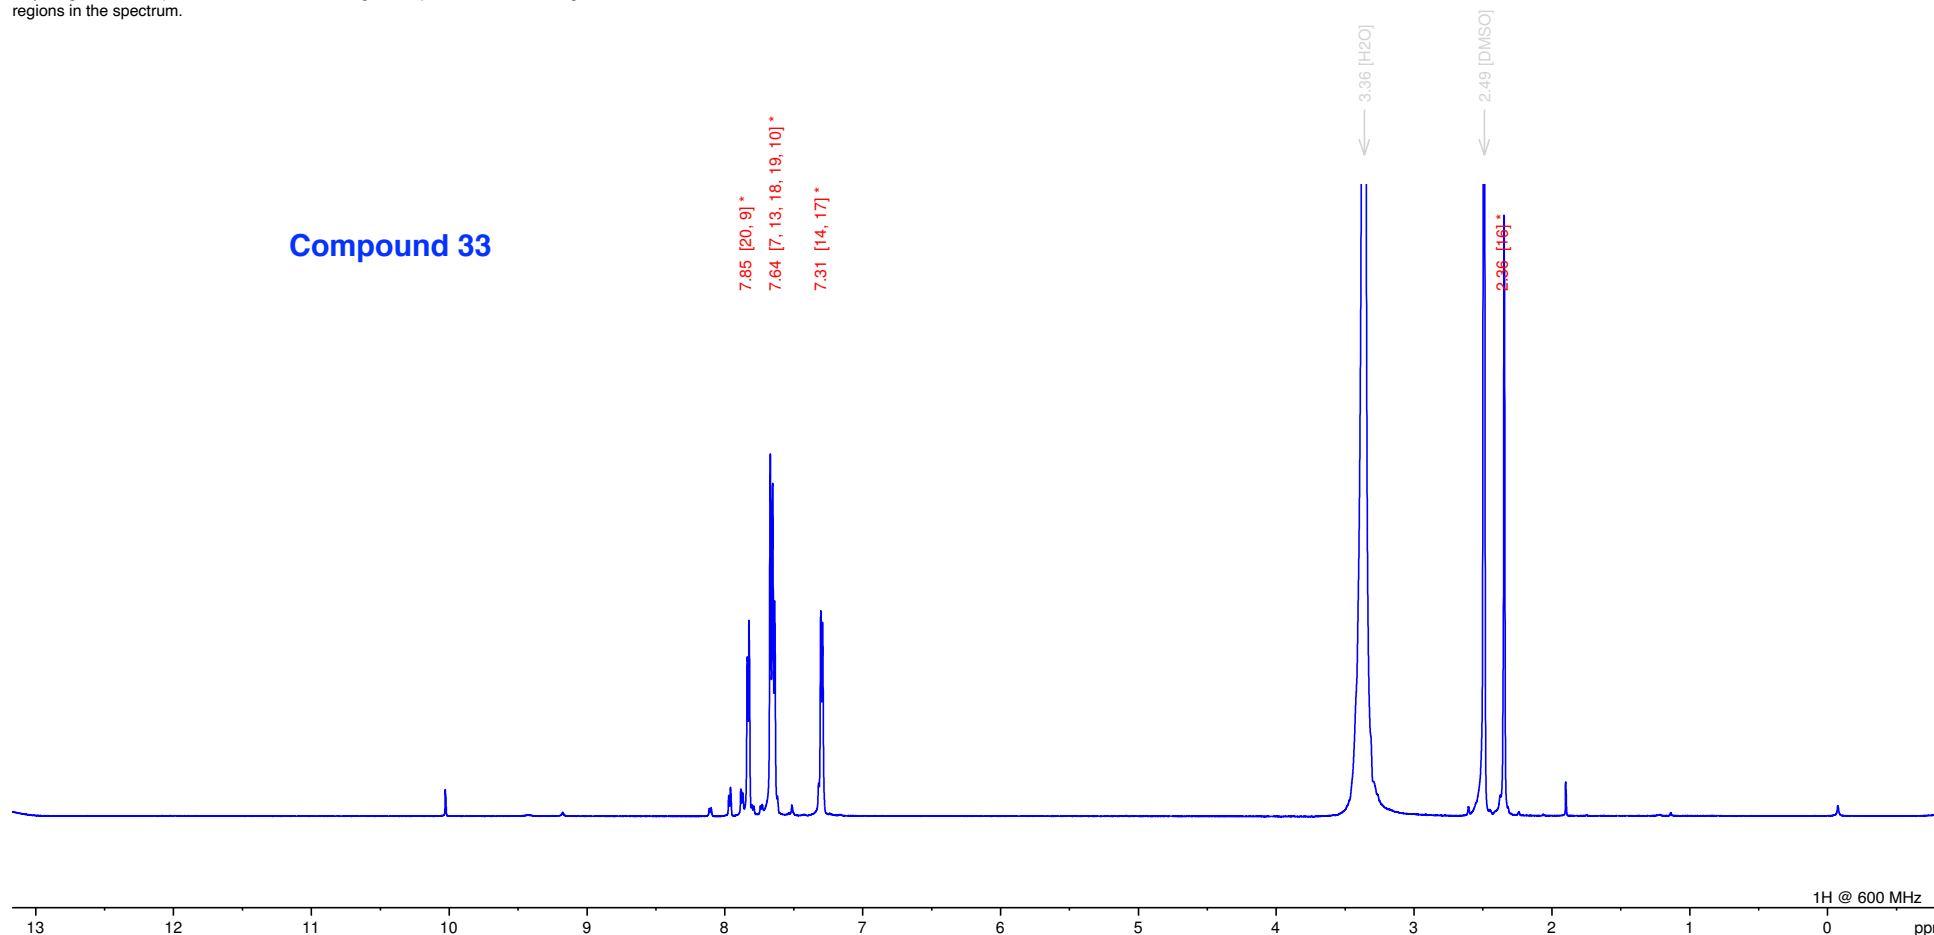

1H @ 600 MHz  
ppm

103dx-007-apt

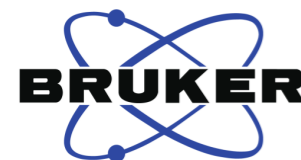

Current Data Parameters  
 NAME CMM210910-t  
 EXPNO 1  
 PROCNO 1

F2 - Acquisition Parameters  
 Date\_ 20210910  
 Time 12.28  
 INSTRUM spect  
 PROBHD 5 mm PATXI 1H/  
 PULPROG jmod  
 TD 65536  
 SOLVENT Acetone  
 NS 2064  
 DS 4  
 SWH 36057.691 Hz  
 FIDRES 0.550197 Hz  
 AQ 0.9087659 sec  
 RG 2050  
 DW 13.867 usec  
 DE 6.50 usec  
 TE 301.3 K  
 CNST2 145.0000000  
 CNST11 1.0000000  
 D1 2.00000000 sec  
 D20 0.00689655 sec  
 TD0 1

===== CHANNEL f1 =====  
 SFO1 150.9178988 MHz  
 NUC1 13C  
 P1 11.80 usec  
 P2 23.60 usec  
 PLW1 202.10000610 W

===== CHANNEL f2 =====  
 SFO2 600.1324005 MHz  
 NUC2 1H  
 CPDPRG[2] waltz16  
 PCPD2 70.00 usec  
 PLW2 13.69999981 W  
 PLW12 0.17449000 W

F2 - Processing parameters  
 SI 32768  
 SF 150.9028090 MHz  
 WDW EM  
 SSB 0  
 LB 1.00 Hz  
 GB 0  
 PC 1.40

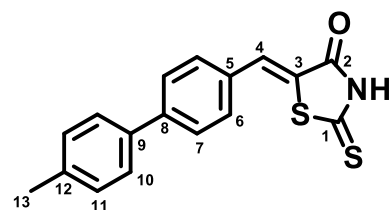

Compound 33

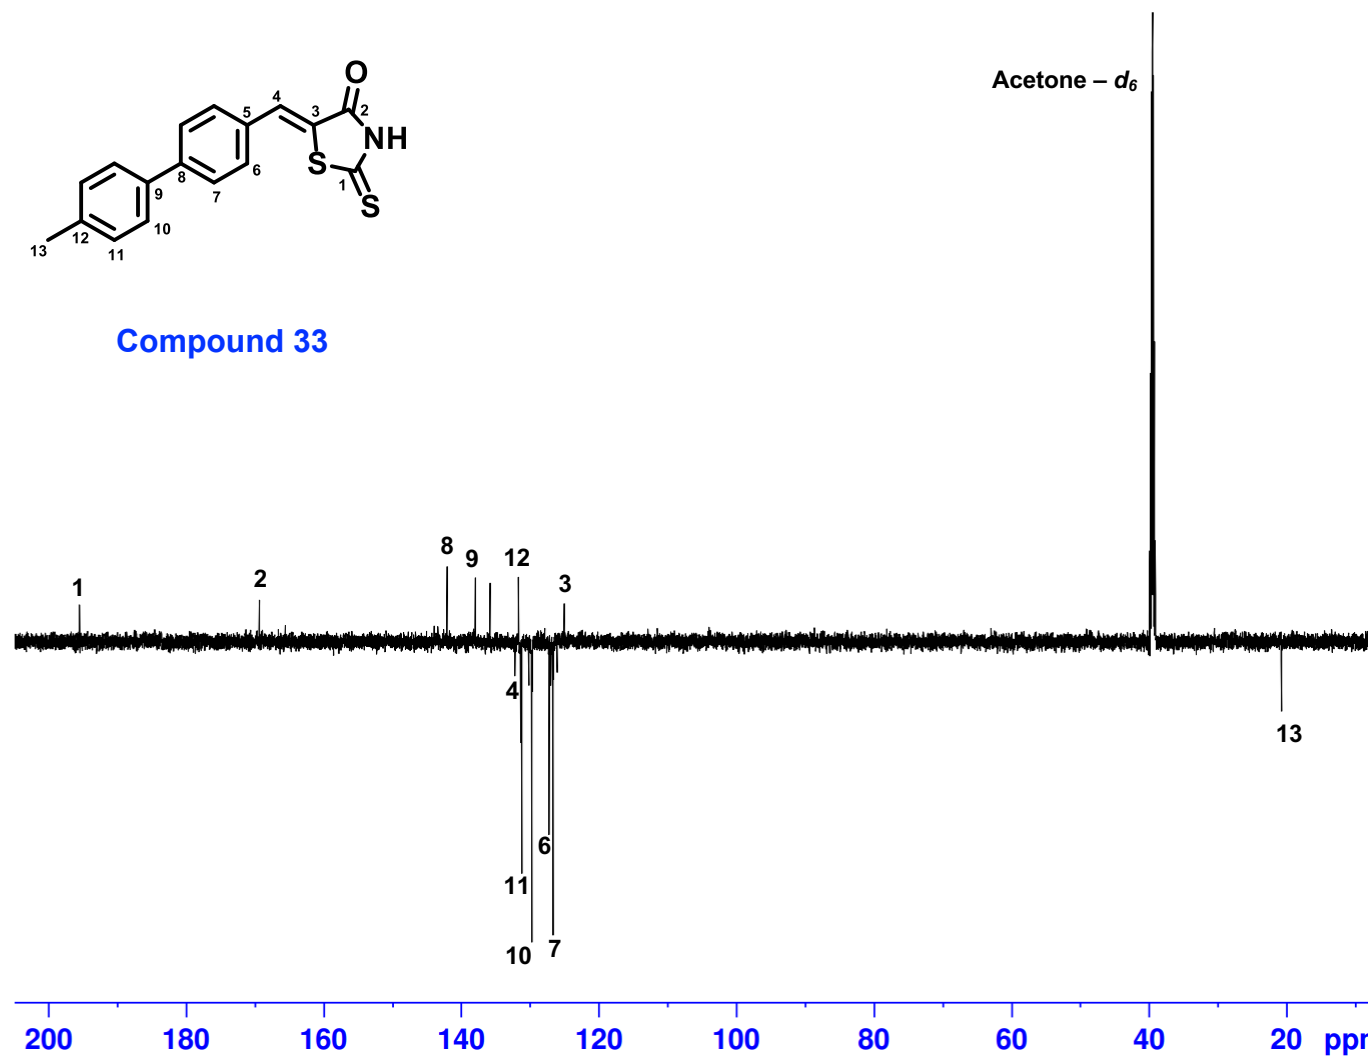

# SAMPLE INFORMATION

|                   |                          |                     |                                 |
|-------------------|--------------------------|---------------------|---------------------------------|
| Sample Name:      | 2021Feb08_TZB103dx_007   | Acquired By:        | System                          |
| Sample Type:      | Unknown                  | Sample Set Name     | TZB_103dx                       |
| Vial:             | 1:F,1                    | Acq. Method Set:    | ReversePhase_12min_Max Plot     |
| Injection #:      | 1                        | Processing Method:  | ReversePhase_Purity_MAX Plot    |
| Injection Volume: | 1.00 ul                  | Channel Name:       | PDA Max Plot 190.0 - 800.0      |
| Run Time:         | 12.0 Minutes             | Proc. Chnl. Descr.: | PDA MaxPlot (190.0 nm to 800.0) |
|                   |                          |                     |                                 |
| Date Acquired:    | 2/8/2021 2:05:57 PM EST  |                     |                                 |
| Date Processed:   | 8/31/2021 3:47:16 PM EDT |                     |                                 |

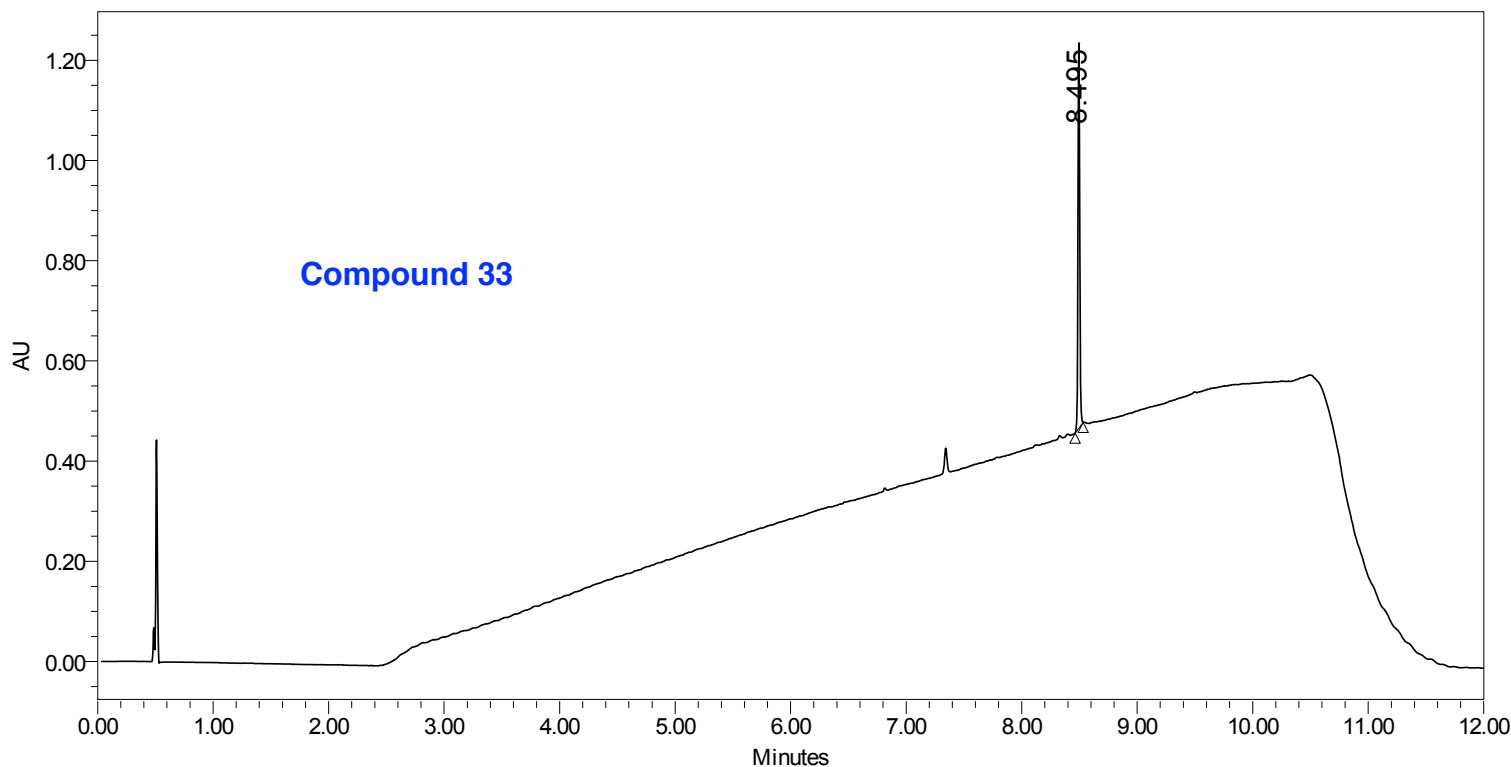

|   | RT    | Area   | % Area | Height | Peak<br>Lambda Max. |
|---|-------|--------|--------|--------|---------------------|
| 1 | 8.495 | 790841 | 100.00 | 768406 | 392.4               |



Page 1 of 11

34 (JMT-167)



Current Data Parameters  
 NAME CMM210915  
 EXPNO 2  
 PROCNO 1

F2 - Acquisition Parameters  
 Date\_ 20210915  
 Time 10.38  
 INSTRUM spect  
 PROBHD 5 mm PATXI 1H/  
 PULPROG jmod  
 TD 65536  
 SOLVENT DMSO  
 NS 1000  
 DS 4  
 SWH 36057.691 Hz  
 FIDRES 0.550197 Hz  
 AQ 0.9087659 sec  
 RG 2050  
 DW 13.867 usec  
 DE 6.50 usec  
 TE 301.2 K  
 CNST2 145.0000000  
 CNST11 1.0000000  
 D1 2.00000000 sec  
 D20 0.00689655 sec  
 TD0 1

===== CHANNEL f1 =====  
 SFO1 150.9178988 MHz  
 NUC1 13C  
 P1 11.80 usec  
 P2 23.60 usec  
 PLW1 202.10000610 W

===== CHANNEL f2 =====  
 SFO2 600.1324005 MHz  
 NUC2 1H  
 CPDPRG2 waltz16  
 PCPD2 70.00 usec  
 PLW2 13.69999981 W  
 PLW12 0.17449000 W

F2 - Processing parameters  
 SI 32768  
 SF 150.9028090 MHz  
 WDW EM  
 SSB 0  
 LB 1.00 Hz  
 GB 0  
 PC 1.40

155.11  
 150.23  
 140.78  
 137.98  
 133.92  
 131.43  
 131.39  
 127.81  
 123.82  
 121.30

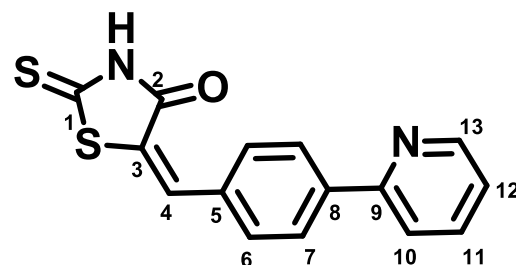

Compound 34

Dimethyl sulfoxide - d<sub>6</sub>

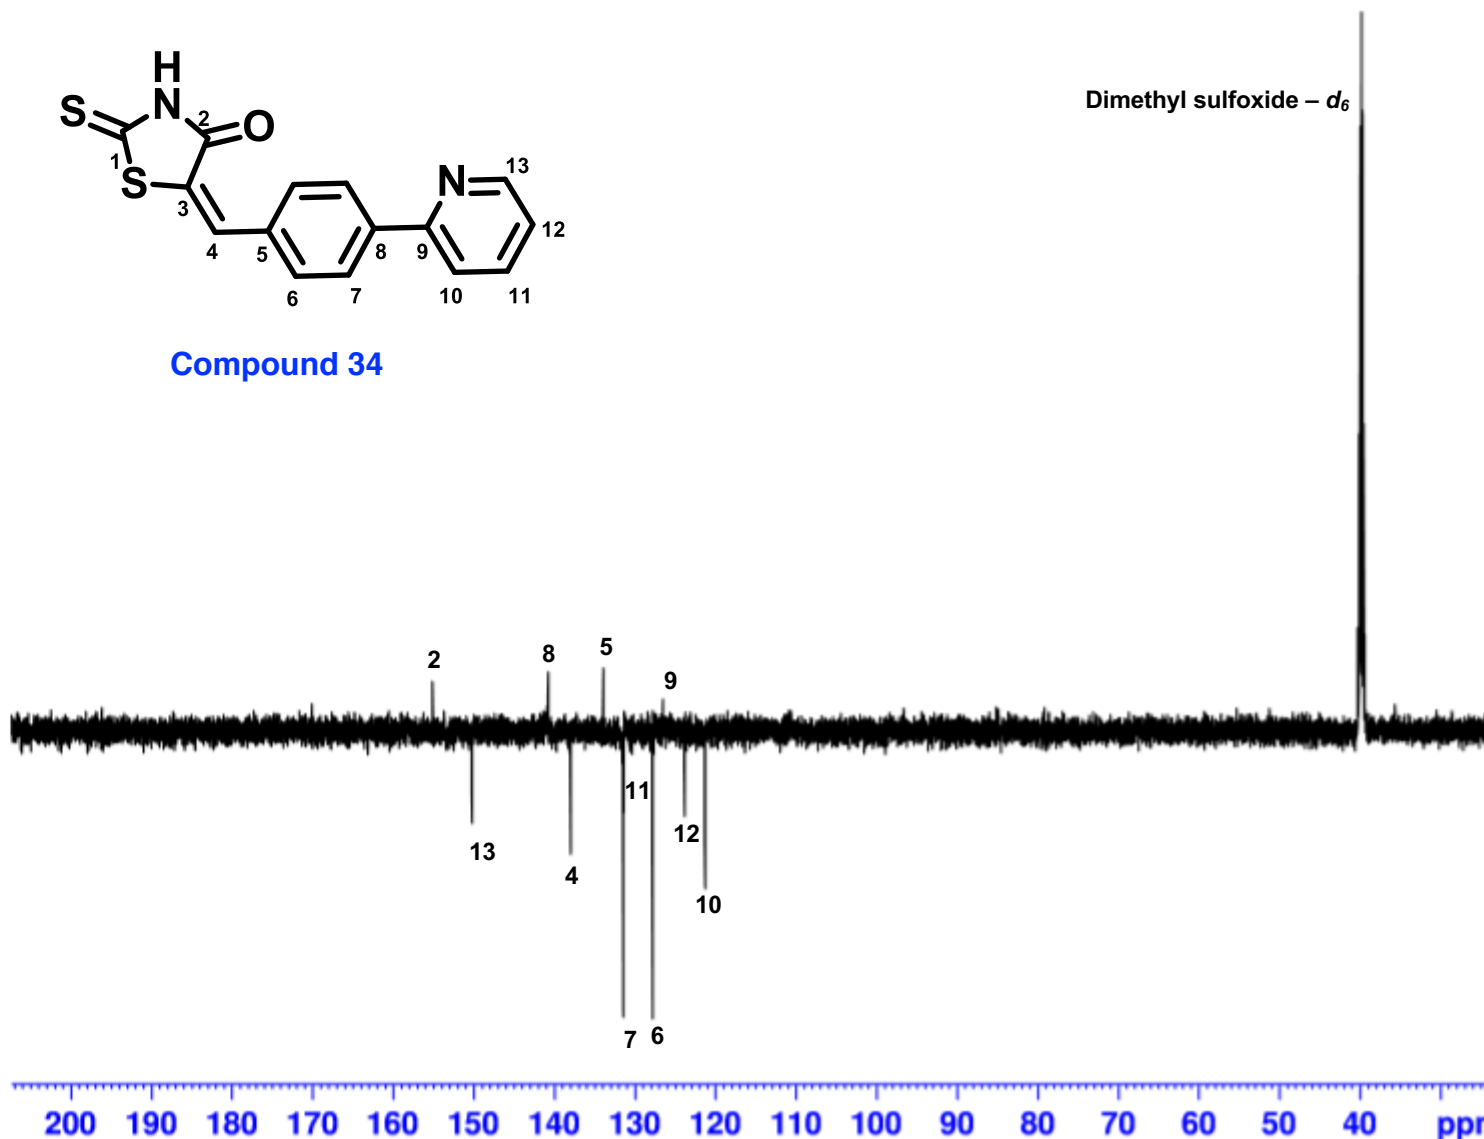

# SAMPLE INFORMATION

|                                          |              |                     |                                 |
|------------------------------------------|--------------|---------------------|---------------------------------|
| Sample Name:                             | 167          | Acquired By:        | System                          |
| Sample Type:                             | Unknown      | Sample Set Name     | 103dx_JMT                       |
| Vial:                                    | 1:B,2        | Acq. Method Set:    | ReversePhase_12min_Max Plot     |
| Injection #:                             | 1            | Processing Method:  | ReversePhase_Purity_MAX Plot    |
| Injection Volume:                        | 1.00 ul      | Channel Name:       | PDA Max Plot 190.0 - 800.0      |
| Run Time:                                | 12.0 Minutes | Proc. Chnl. Descr.: | PDA MaxPlot (190.0 nm to 800.0) |
| Date Acquired: 7/27/2021 8:34:05 PM EDT  |              |                     |                                 |
| Date Processed: 8/31/2021 3:42:43 PM EDT |              |                     |                                 |

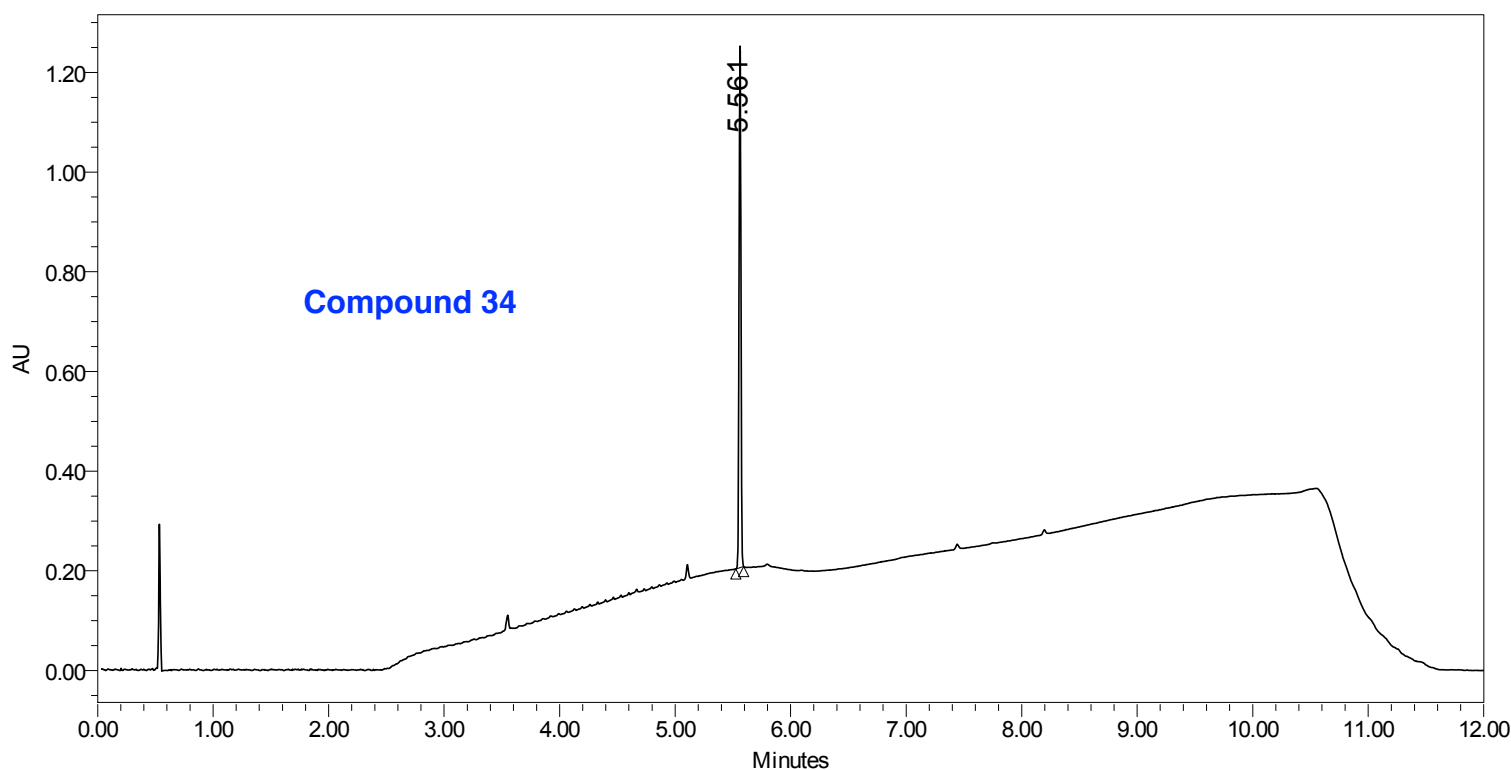

|   | RT    | Area    | % Area | Height  | Peak<br>Lambda Max. |
|---|-------|---------|--------|---------|---------------------|
| 1 | 5.561 | 1199345 | 100.00 | 1047356 | 388.1               |

CMM210622

Consistency: Unknown\*, unknown  
purity\*

Data set 1H: CMM210622 7 1 /opt/topspin4.1.3  
Structure: /opt/topspin4.1.3/CMM210622/7/structure.mol  
Acquisition date: June 22, 2021 11:36:16 AM EDT  
Solvent: DMSO  
Probe: 5 mm PATXI 1H/D/19F-13C/15N Z-GRD Z855801/0017  
Eretic reference:

**Comments:**  
Multiplet interpretation available for spectrum.  
A multiplet interpretation for all major signals in the spectrum could be found. All given impurities could be assigned to regions in the spectrum.

**Signature:**

Automatic analysis generated by Bruker CMC (b:17).  
One or more results have not been created by automatic analysis, or edited manually: marked by '\*'.  
Report generated by Bruker CMC-assist TopSpin 4.1.3 (of 2021-06-28 13:00:50), on 'MacBook-Pro.local' as 'tzbenton'

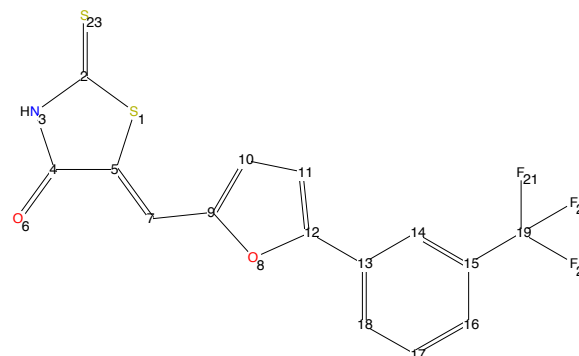

Sum formula:  
C<sub>15</sub>H<sub>6</sub>F<sub>3</sub>NO<sub>2</sub>S<sub>2</sub>

Molecular Mass:  
354.99 Da

Compound 35

8.09 [14] \*  
7.79 [16, 7] \*  
7.49 [10, 11] \*  
7.28 [17] \*

3.32 [H<sub>2</sub>O]  
2.51 [DMSO]

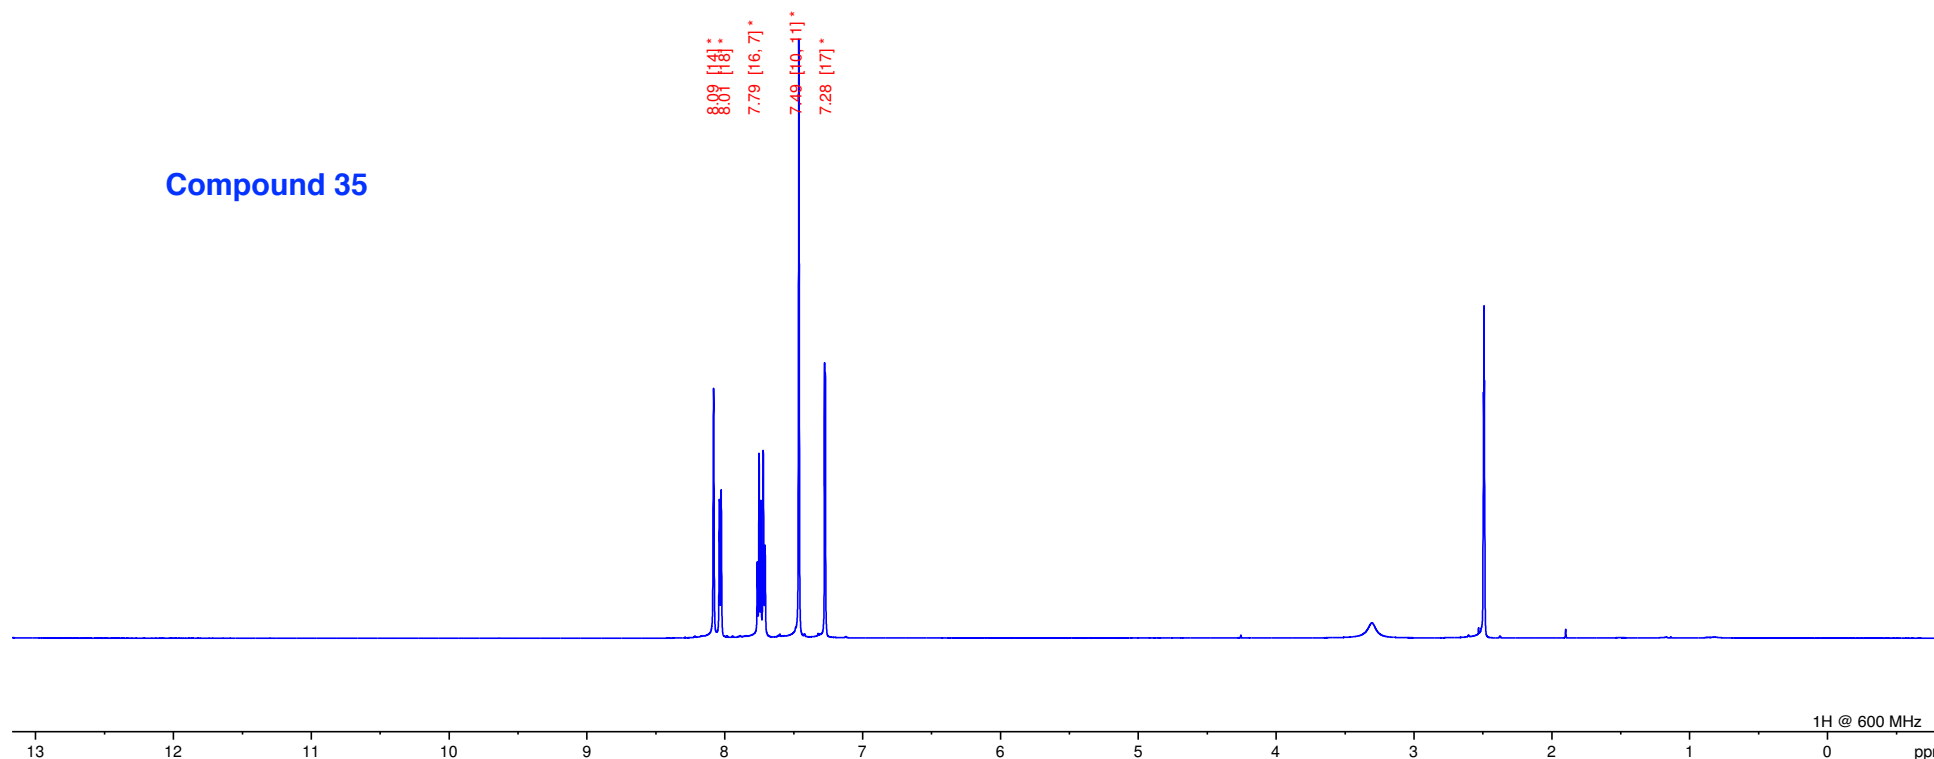

1H @ 600 MHz  
ppm

35 (JMT-169)

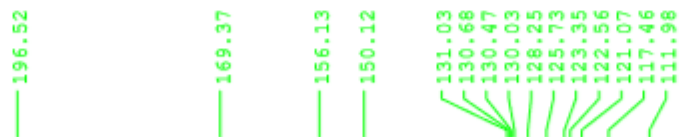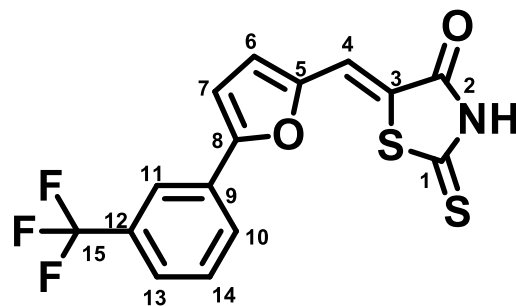

Compound 35

Dimethyl sulfoxide - d<sub>6</sub>

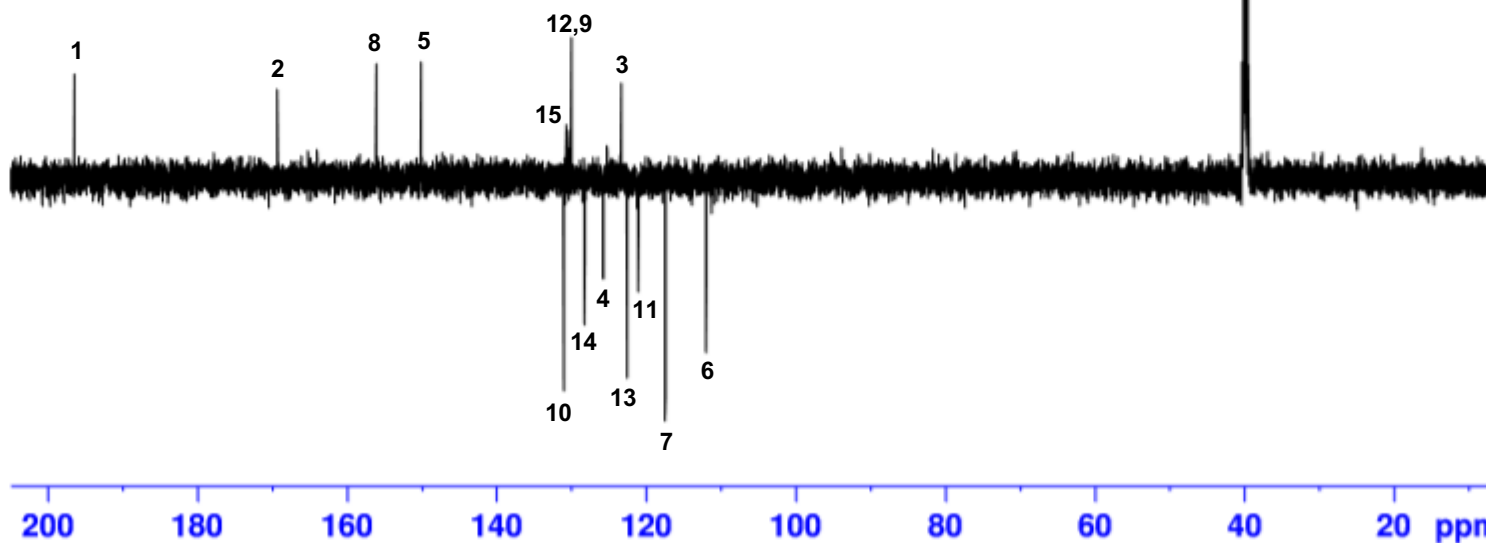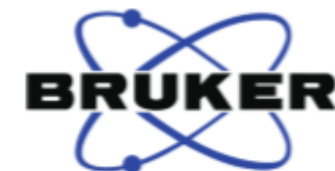

Current Data Parameters  
NAME CMM210914  
EXPNO 2  
PROCNO 1

F2 - Acquisition Parameters  
Date\_ 20210914  
Time 10.30  
INSTRUM spect  
PROBHD 5 mm PATXI 1H/  
PULPROG jmod  
TD 65536  
SOLVENT DMSO  
NS 1000  
DS 4  
SWH 36057.691 Hz  
FIDRES 0.550197 Hz  
AQ 0.9087659 sec  
RG 2050  
DW 13.867 usec  
DE 6.50 usec  
TE 301.3 K  
CNST2 145.000000  
CNST11 1.000000  
D1 2.00000000 sec  
D20 0.00689655 sec  
TD0 1

CHANNEL f1  
SFO1 150.9178988 MHz  
NUC1 13C  
P1 11.80 usec  
P2 23.60 usec  
PLW1 202.10000610 W

CHANNEL f2  
SFO2 600.1324005 MHz  
NUC2 1H  
CPDPRG2 waltz16  
PCPD2 70.00 usec  
PLW2 13.69999981 W  
PLW12 0.17449000 W

F2 - Processing parameters  
SI 32768  
SF 150.9028090 MHz  
WDW EM  
SSB 0  
LB 1.00 Hz  
GB 0  
PC 1.40

# SAMPLE INFORMATION

|                   |                           |                     |                                 |
|-------------------|---------------------------|---------------------|---------------------------------|
| Sample Name:      | 169                       | Acquired By:        | System                          |
| Sample Type:      | Unknown                   | Sample Set Name     | 103dx_JMT                       |
| Vial:             | 1:C,3                     | Acq. Method Set:    | ReversePhase_12min_Max Plot     |
| Injection #:      | 1                         | Processing Method:  | ReversePhase_Purity_MAX Plot    |
| Injection Volume: | 1.00 ul                   | Channel Name:       | PDA Max Plot 190.0 - 800.0      |
| Run Time:         | 12.0 Minutes              | Proc. Chnl. Descr.: | PDA MaxPlot (190.0 nm to 800.0) |
|                   |                           |                     |                                 |
| Date Acquired:    | 7/27/2021 10:26:00 PM EDT |                     |                                 |
| Date Processed:   | 8/31/2021 3:45:39 PM EDT  |                     |                                 |

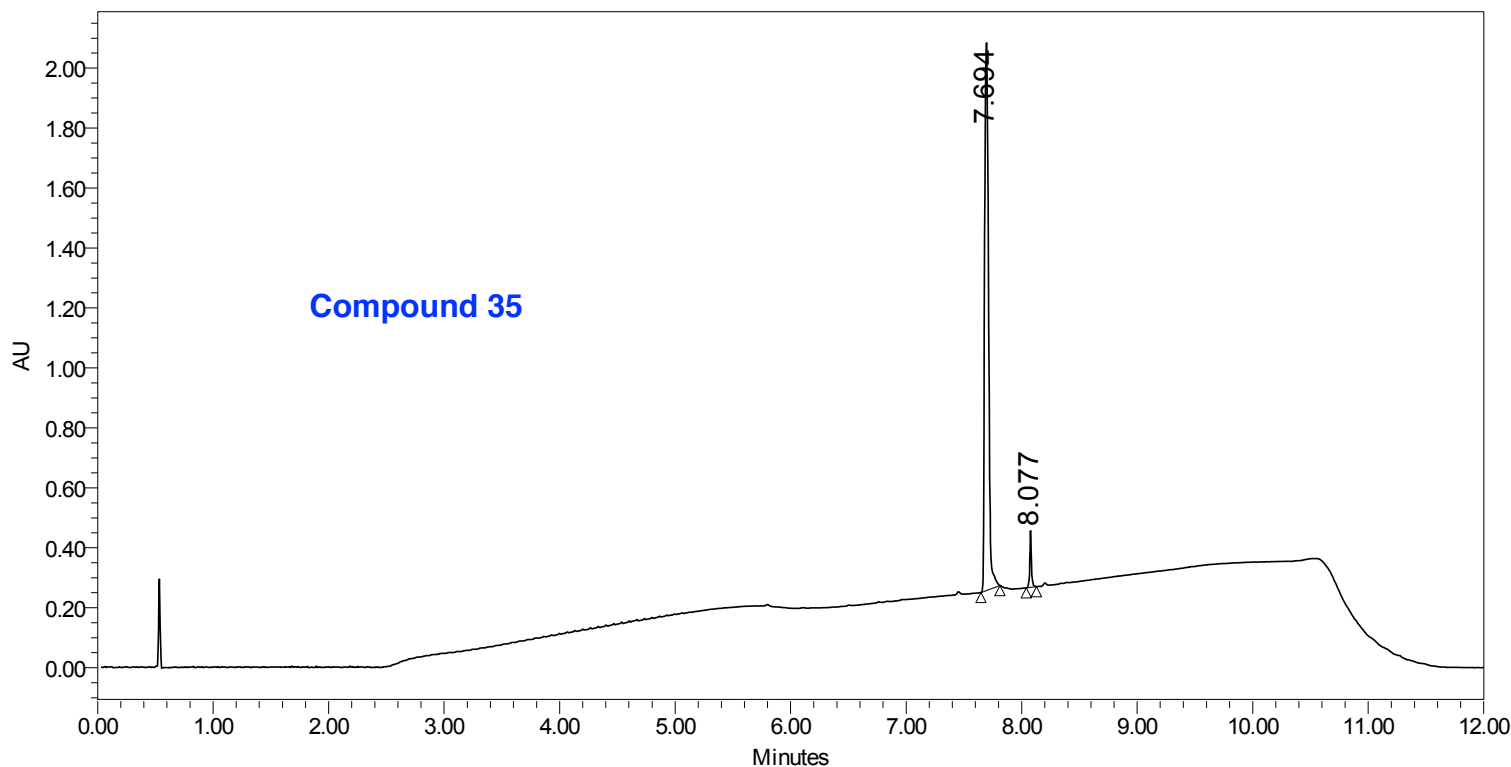

|   | RT    | Area    | % Area | Height  | Peak<br>Lambda Max. |
|---|-------|---------|--------|---------|---------------------|
| 1 | 7.694 | 4321518 | 95.76  | 1827309 | 304.9               |
| 2 | 8.077 | 191439  | 4.24   | 189068  | 441.7               |

CMM210622

JMT-173

Consistency: Unknown\*, unknown  
purity\*

Data set 1H: CMM210622 4 1 /opt/topspin4.1.3  
Structure: /opt/topspin4.1.3/CMM210622/4/structure.mol  
Acquisition date: June 22, 2021 11:20:30 AM EDT  
Solvent: DMSO  
Probe: 5 mm PATXI 1H/D/19F-13C/15N Z-GRD Z855801/0017  
Eretic reference:

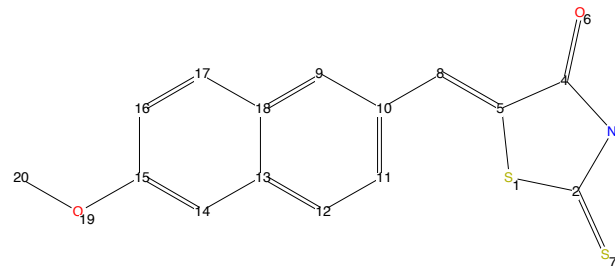

Sum formula:  
C<sub>15</sub>H<sub>11</sub>NO<sub>2</sub>S<sub>2</sub>

Molecular Mass:  
301.02 Da

**Comments:**  
Multiplet interpretation available for spectrum.  
A multiplet interpretation for all major signals in the spectrum could be found. All given impurities could be assigned to regions in the spectrum.

**Signature:**

Automatic analysis generated by Bruker CMC (b:17).  
One or more results have not been created by automatic analysis, or edited manually: marked by '\*'.  
Report generated by Bruker CMC-assist TopSpin 4.1.3 (of 2021-06-28 13:00:50), on 'MacBook-Pro.local' as 'tzbenton'

## Compound 36

8.07 [9] \*  
7.91 [17, 11] \*  
7.75 [8] \*  
7.55 [12] \*  
7.34 [14] \*  
7.18 [16] \*

3.18 [H<sub>2</sub>O]  
2.46 [DMSO]

3.99 [20]

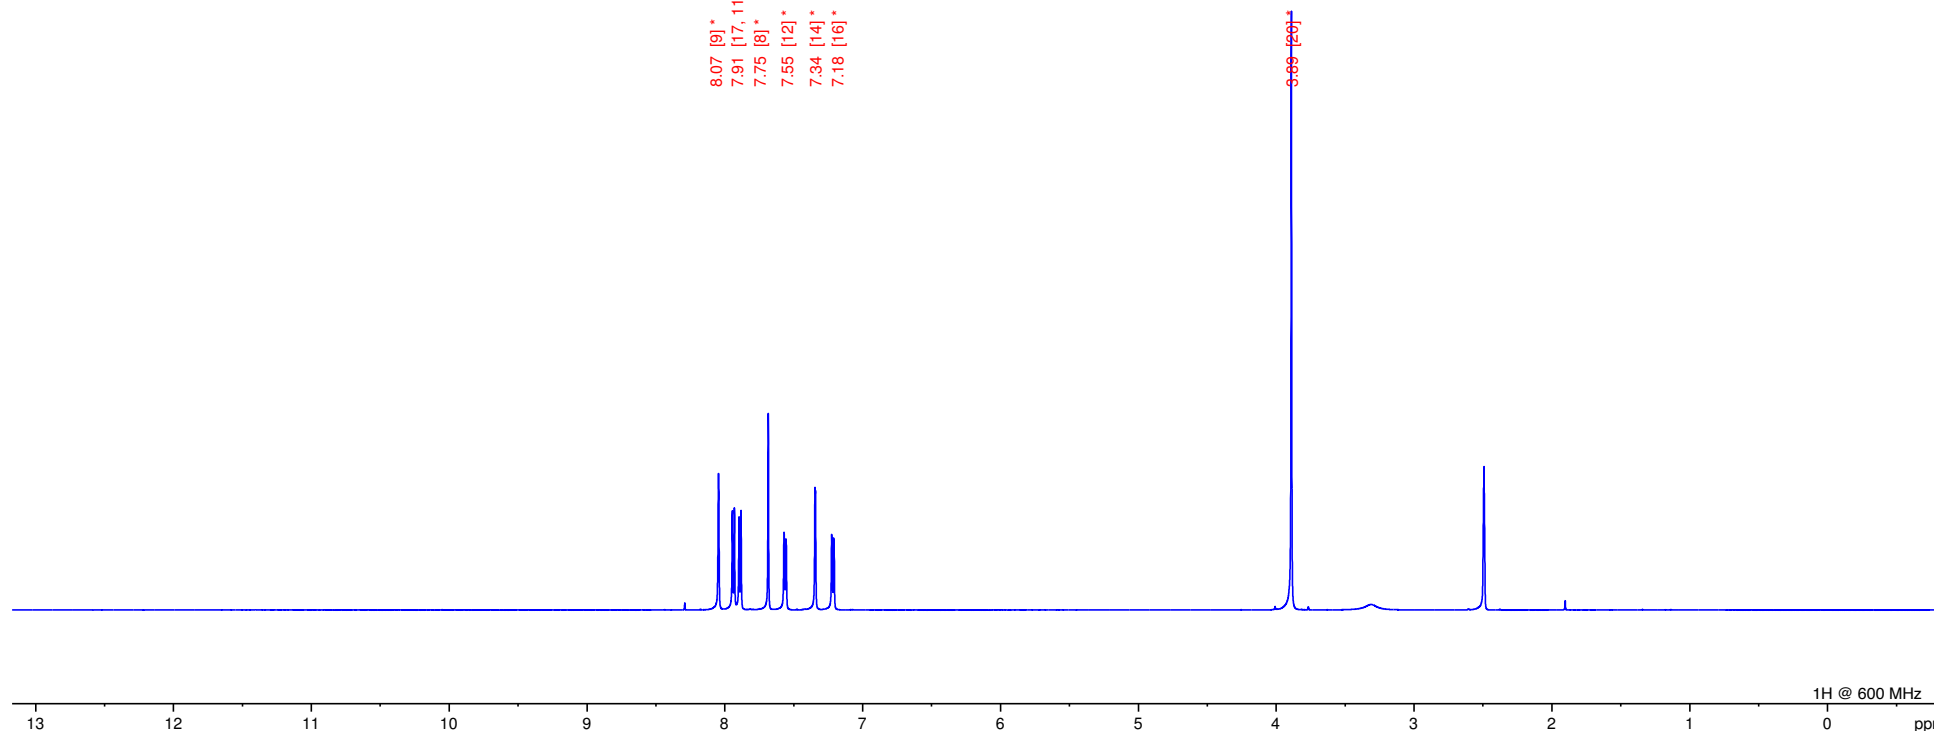

1H @ 600 MHz  
ppm

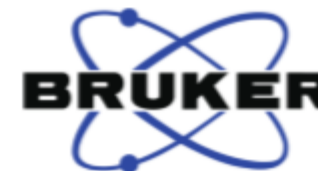

Current Data Parameters  
NAME CMM210914  
EXPNO 5  
PROCNO 1

F2 - Acquisition Parameters  
Date\_ 20210914  
Time 13.53  
INSTRUM spect  
PROBHD 5 mm PATXI 1H/  
PULPROG jmod  
TD 65536  
SOLVENT DMSO  
NS 1000  
DS 4  
SWH 36057.691 Hz  
FIDRES 0.550197 Hz  
AQ 0.9087659 sec  
RG 2050  
DW 13.867 usec  
DE 6.50 usec  
TE 301.3 K  
CNST2 145.000000  
CNST11 1.000000  
D1 2.0000000 sec  
D20 0.00689655 sec  
TD0 1

===== CHANNEL f1 =====  
SFO1 150.9178988 MHz  
NUC1 13C  
P1 11.80 usec  
P2 23.60 usec  
PLW1 202.10000610 W

===== CHANNEL f2 =====  
SFO2 600.1324005 MHz  
NUC2 1H  
CPDPRG[2] waltz16  
PCPD2 70.00 usec  
PLW2 13.69999981 W  
PLW12 0.17449000 W

F2 - Processing parameters  
SI 32768  
SF 150.9028090 MHz  
WDW EM  
SSB 0  
LB 1.00 Hz  
GB 0  
PC 1.40

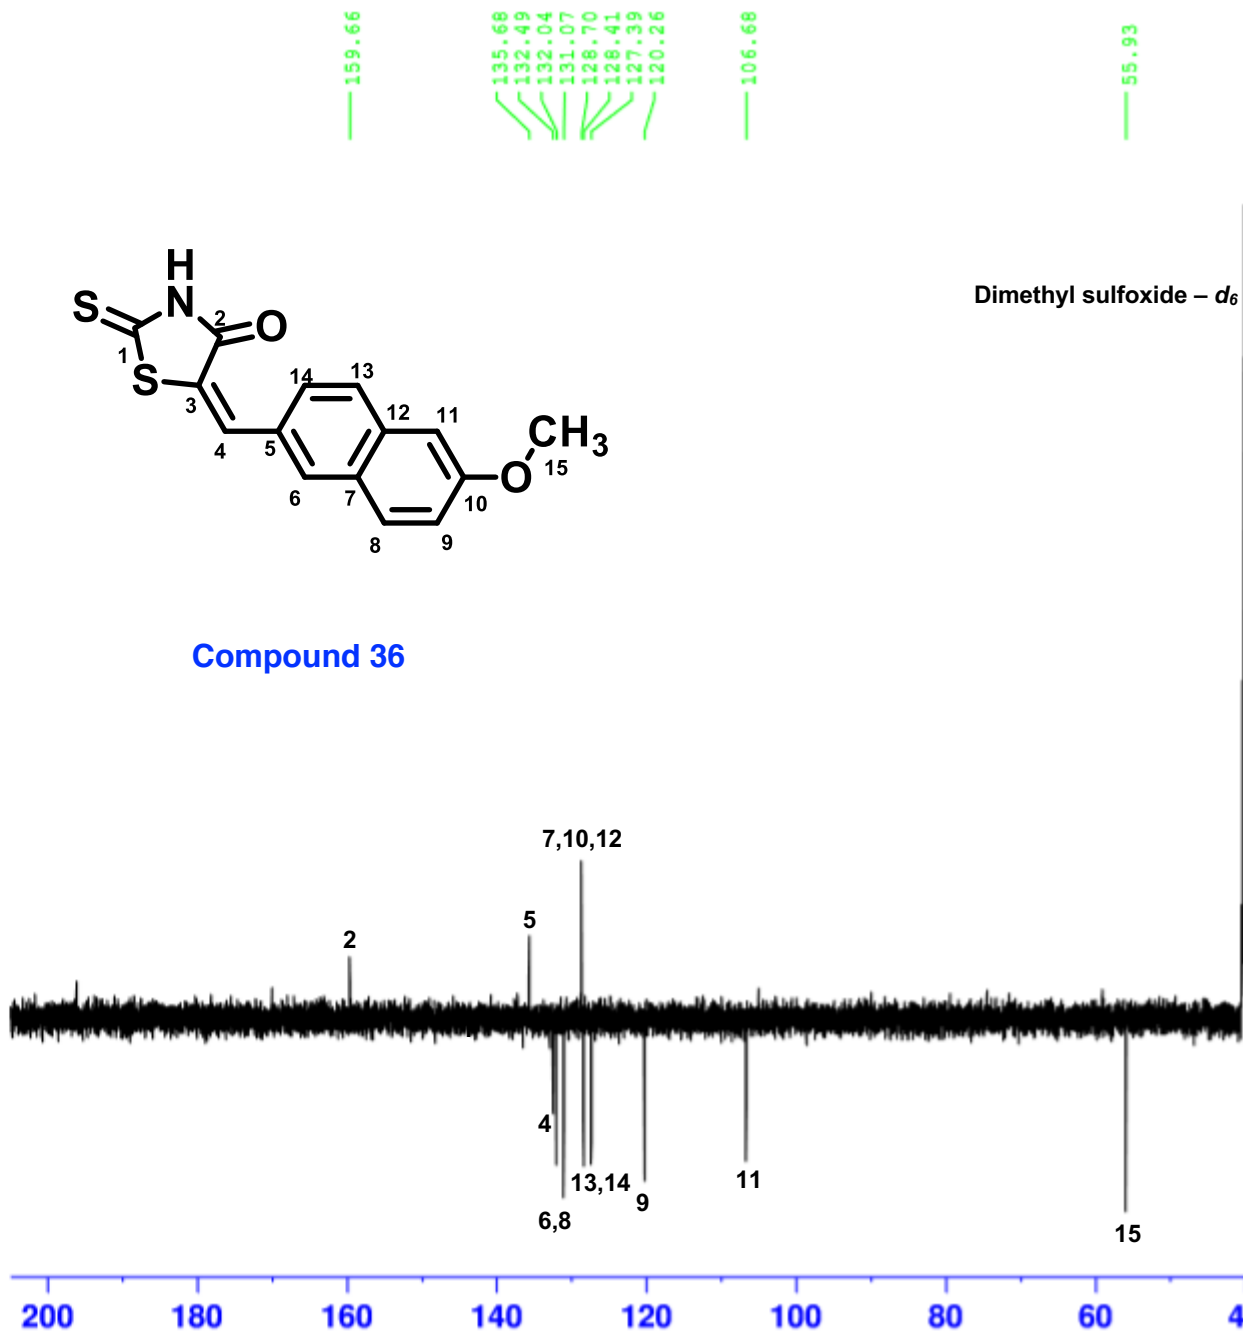



# SAMPLE INFORMATION

|                   |                          |                     |                                |
|-------------------|--------------------------|---------------------|--------------------------------|
| Sample Name:      | 173                      | Acquired By:        | System                         |
| Sample Type:      | Unknown                  | Sample Set Name     | 103dx_JMT_2                    |
| Vial:             | 1:D,1                    | Acq. Method Set:    | ReversePhase_12min_Max Plot    |
| Injection #:      | 1                        | Processing Method:  | ReversePhase_Purity_MAX Plot   |
| Injection Volume: | 2.00 ul                  | Channel Name:       | PDA Max Plot 190.0 - 800.0     |
| Run Time:         | 12.0 Minutes             | Proc. Chnl. Descr.: | PDA MaxPlot (190.0 nm to 800.0 |
| Date Acquired:    | 8/31/2021 4:51:35 PM EDT |                     |                                |
| Date Processed:   | 9/1/2021 10:43:08 AM EDT |                     |                                |

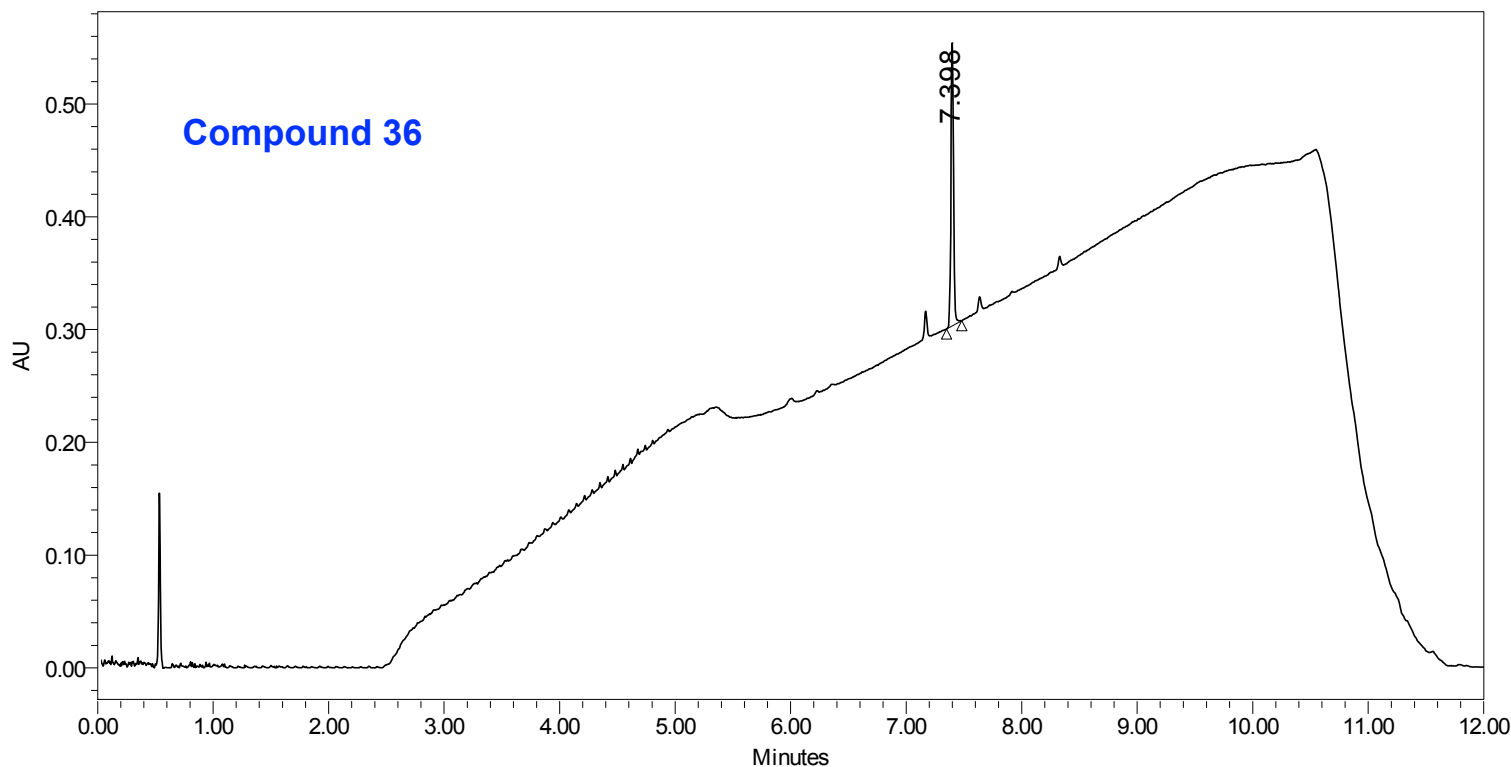

|   | RT    | Area   | % Area | Height | Peak<br>Lambda Max. |
|---|-------|--------|--------|--------|---------------------|
| 1 | 7.398 | 393044 | 100.00 | 250883 | 407.4               |

TZB-009\_2

Consistency: Unknown\*, unknown

purity\*

Data set 1H: TZB-009\_2 1 1 /opt/topspin4.1.3  
 Structure: /opt/topspin4.1.3/TZB-009\_2/1/structure.mol  
 Acquisition date: July 21, 2021 9:01:46 AM EDT  
 Solvent: Acetone  
 Probe: 5 mm PATXI 1H/D/19F-13C/15N Z-GRD Z855801/0017  
 Eretic reference:

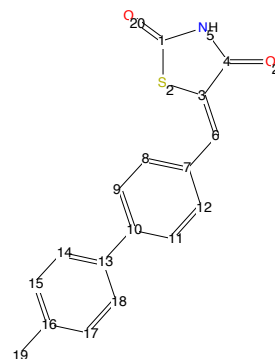

Sum formula:  
 C<sub>17</sub>H<sub>13</sub>NO<sub>2</sub>S

Molecular Mass:  
 295.07 Da

Comments:

Multiplet interpretation available for spectrum.  
 A multiplet interpretation for all major signals in the spectrum could be found. All given impurities could be assigned to regions in the spectrum.

Signature:

Automatic analysis generated by Bruker CMC (b:17).

One or more results have not been created by automatic analysis, or edited manually: marked by '\*'.  
 Report generated by Bruker CMC-assist TopSpin 4.1.3 (of 2021-06-28 13:00:50), on 'MacBook-Pro.local' as 'tzbenton'

Compound 37

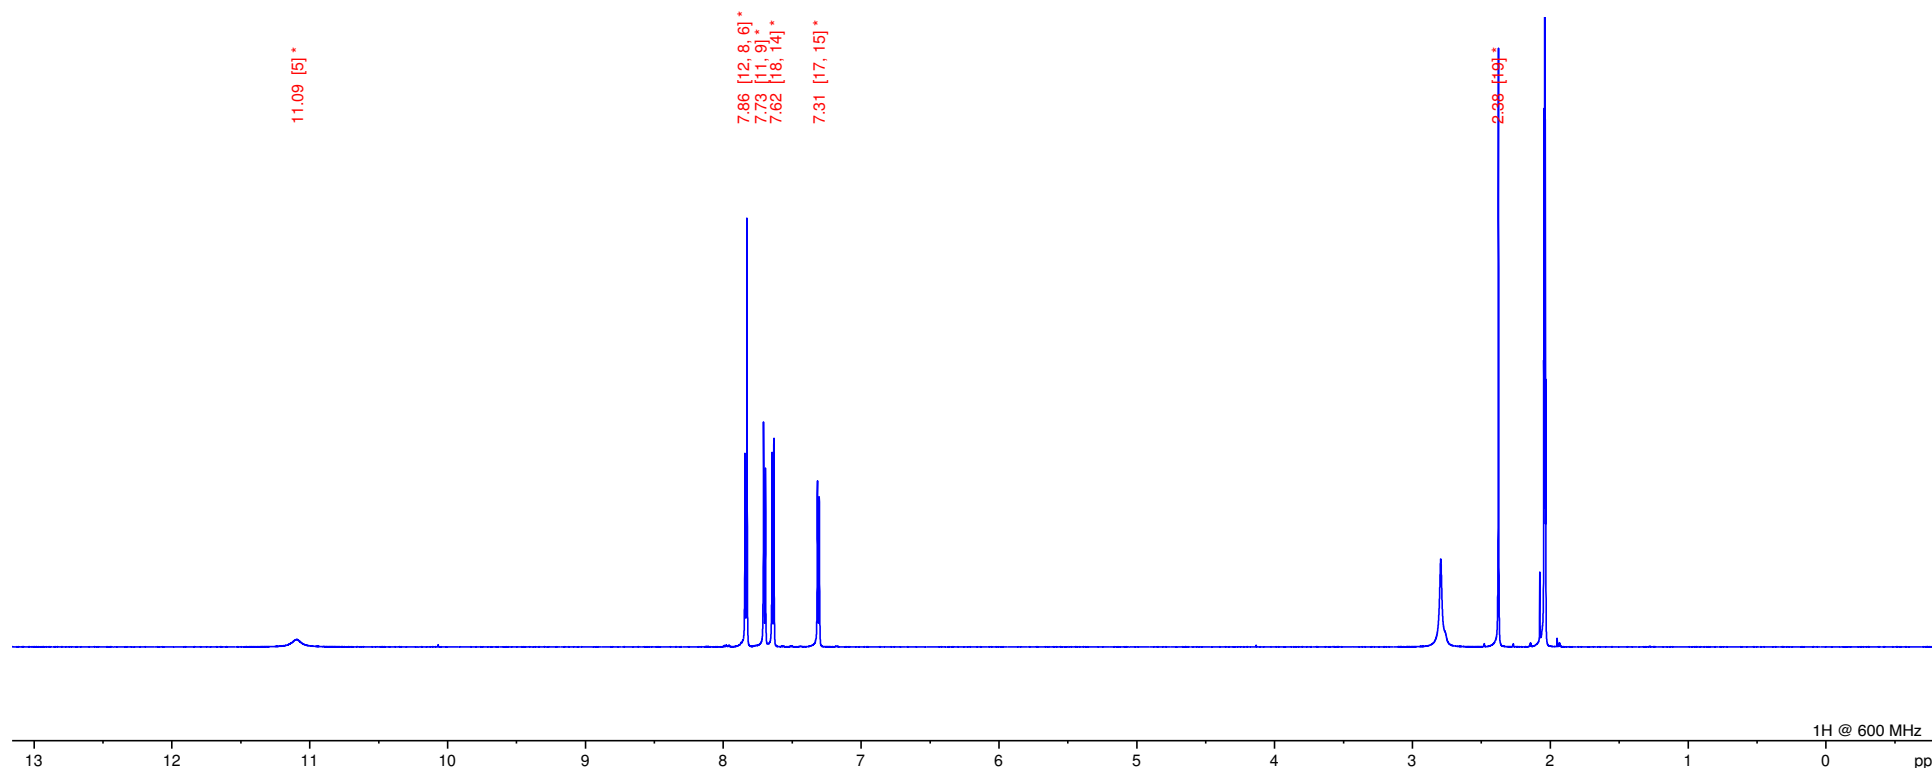

37 (TZB103dx009)

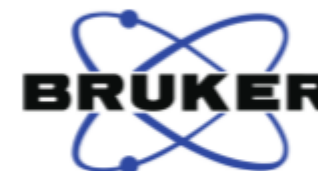

Current Data Parameters  
 NAME CMM210917  
 EXPNO 6  
 PROCNO 1

# F2 - Acquisition Parameters

Date\_ 20210917  
 Time 14.02  
 INSTRUM spect  
 PROBHD 5 mm PATXI 1H/  
 PULPROG jmod  
 TD 65536  
 SOLVENT DMSO  
 NS 1000  
 DS 4  
 SWH 36057.691 Hz  
 FIDRES 0.550197 Hz  
 AQ 0.9087659 sec  
 RG 2050  
 DW 13.867 usec  
 DE 6.50 usec  
 TE 302.7 K  
 CNST2 145.0000000  
 CNST11 1.0000000  
 D1 2.00000000 sec  
 D20 0.00689655 sec  
 TD0 1

===== CHANNEL f1 =====  
 SFO1 150.9178988 MHz  
 NUC1 13C  
 P1 11.80 usec  
 P2 23.60 usec  
 PLW1 202.10000610 W

===== CHANNEL f2 =====  
 SFO2 600.1324005 MHz  
 NUC2 1H  
 CPDPRG[2] waltz16  
 PCPD2 70.00 usec  
 PLW2 13.69999981 W  
 PLW12 0.17449000 W

F2 - Processing parameters  
 SI 32768  
 SF 150.9028090 MHz  
 WDW EM  
 SSB 0  
 LB 1.00 Hz  
 GB 0  
 PC 1.40

Compound 37

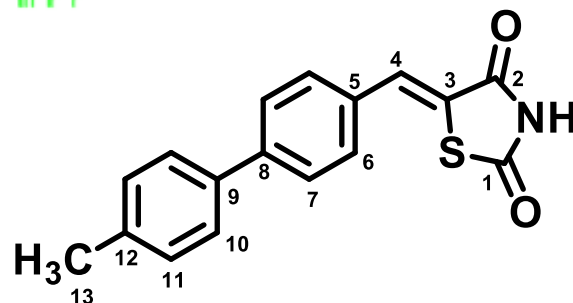

Dimethyl sulfoxide - d<sub>6</sub>

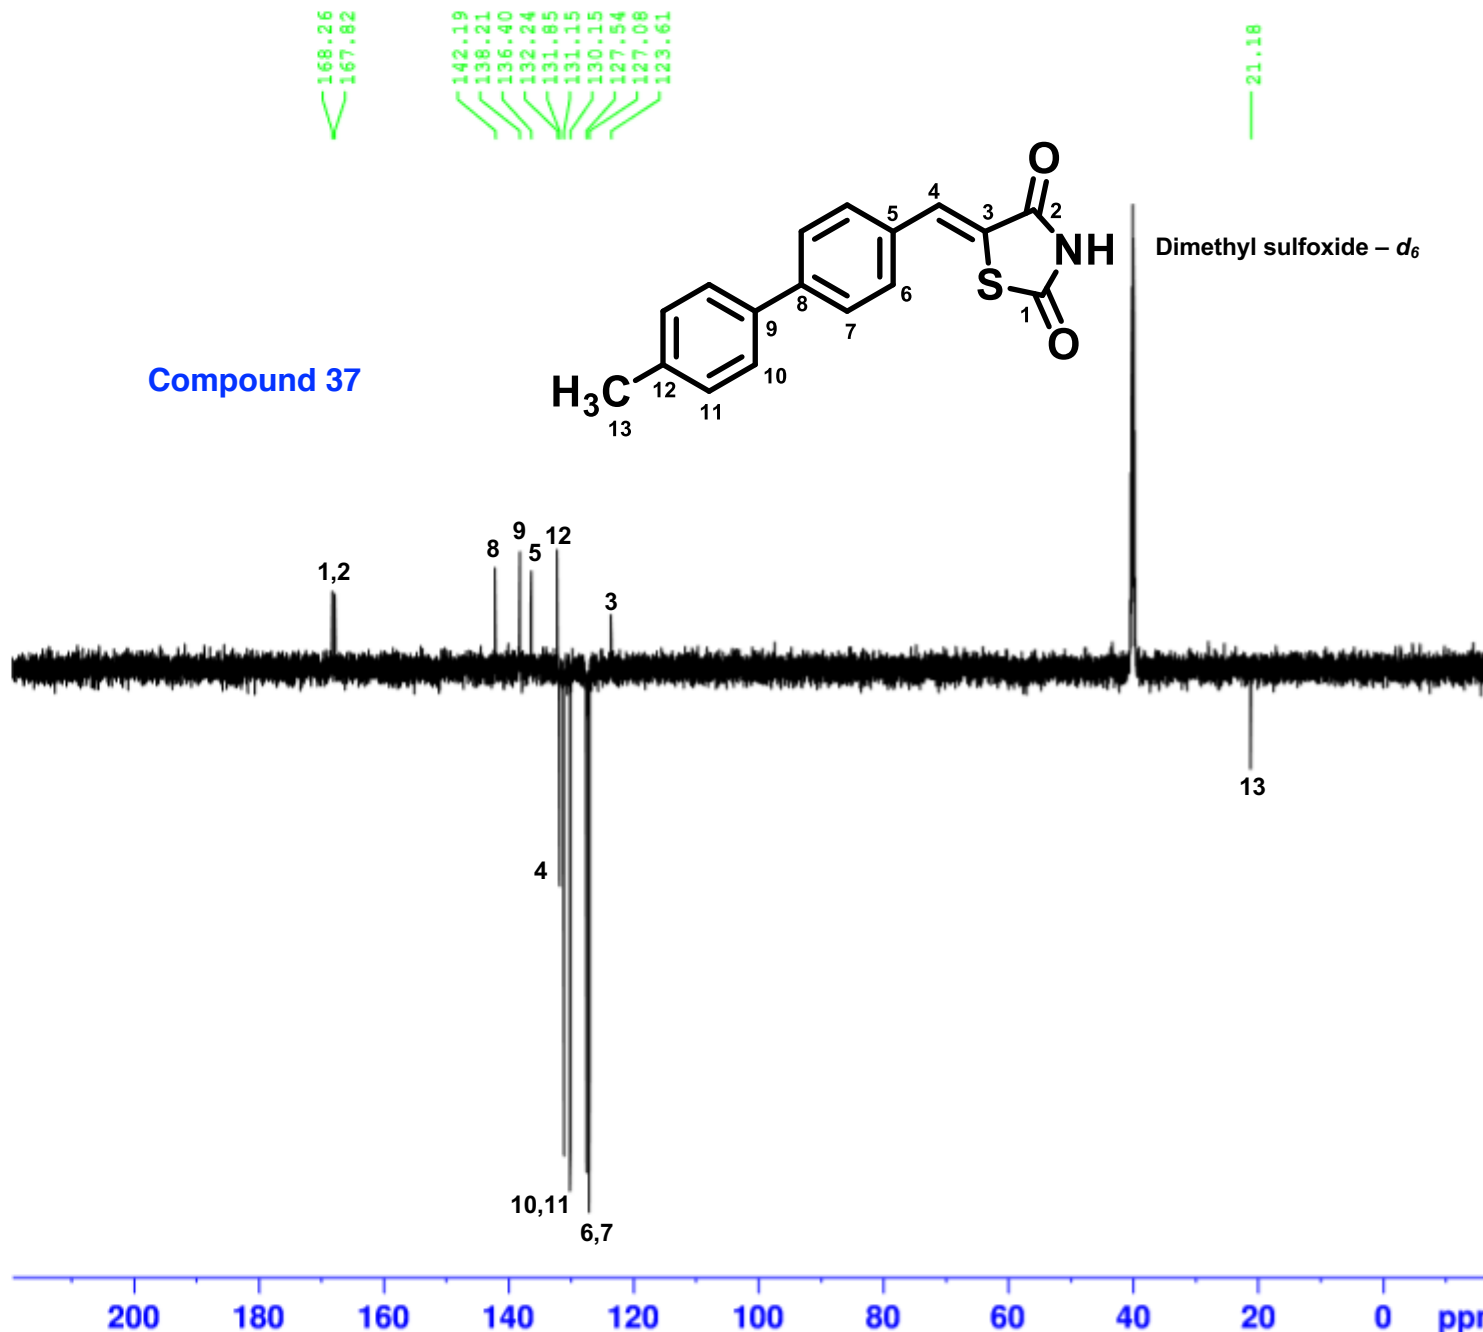

# SAMPLE INFORMATION

|                   |                          |                     |                                 |
|-------------------|--------------------------|---------------------|---------------------------------|
| Sample Name:      | 009                      | Acquired By:        | System                          |
| Sample Type:      | Unknown                  | Sample Set Name     | 103dx_JMT                       |
| Vial:             | 1:B,6                    | Acq. Method Set:    | ReversePhase_12min_Max Plot     |
| Injection #:      | 1                        | Processing Method:  | ReversePhase_Purity_MAX Plot    |
| Injection Volume: | 1.00 ul                  | Channel Name:       | PDA Max Plot 190.0 - 800.0      |
| Run Time:         | 12.0 Minutes             | Proc. Chnl. Descr.: | PDA MaxPlot (190.0 nm to 800.0) |
|                   |                          |                     |                                 |
| Date Acquired:    | 7/27/2021 9:23:17 PM EDT |                     |                                 |
| Date Processed:   | 8/31/2021 3:25:18 PM EDT |                     |                                 |

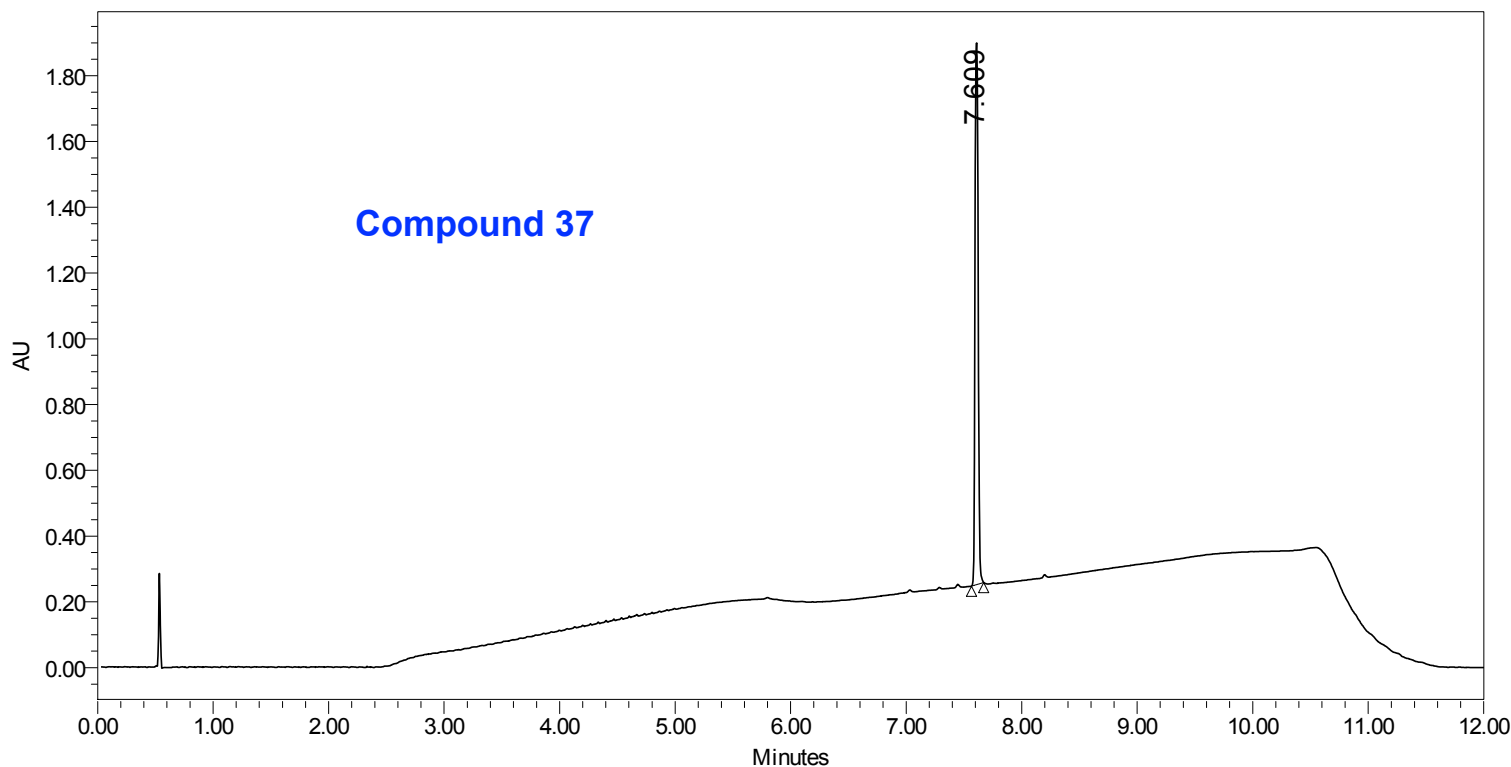

|   | RT    | Area    | % Area | Height  | Peak<br>Lambda Max. |
|---|-------|---------|--------|---------|---------------------|
| 1 | 7.609 | 3114188 | 100.00 | 1648063 | 345.8               |

JMT\_129

Consistency: Unknown\*, unknown  
purity\*

Data set 1H: JMT\_129 1 1 /opt/topspin4.1.3  
Structure: /opt/topspin4.1.3/JMT\_129/structure.mol  
Acquisition date: July 18, 2021 5:12:28 PM EDT  
Solvent: Acetone  
Probe: 5 mm PATXI 1H/D/19F-13C/15N Z-GRD Z855801/0017  
Eretic reference:

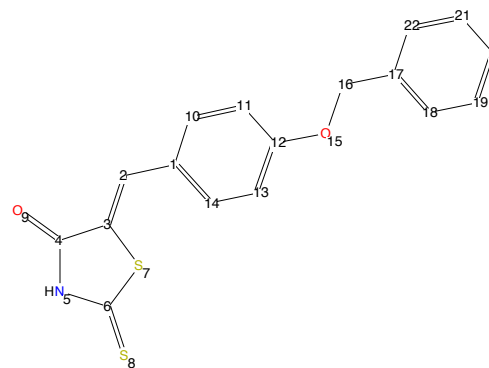

Sum formula:  
C<sub>17</sub>H<sub>13</sub>NO<sub>2</sub>S<sub>2</sub>

Molecular Mass:  
327.04 Da

Comments:  
Multiplet interpretation available for spectrum.  
A multiplet interpretation for all major signals in the spectrum could be found. All given impurities could be assigned to regions in the spectrum.

Signature:

Automatic analysis generated by Bruker CMC (b:17).  
One or more results have not been created by automatic analysis, or edited manually: marked by '\*'.  
Report generated by Bruker CMC-assist TopSpin 4.1.3 (of 2021-06-28 13:00:50), on 'MacBook-Pro.local' as 'tzbenton'

Compound 38

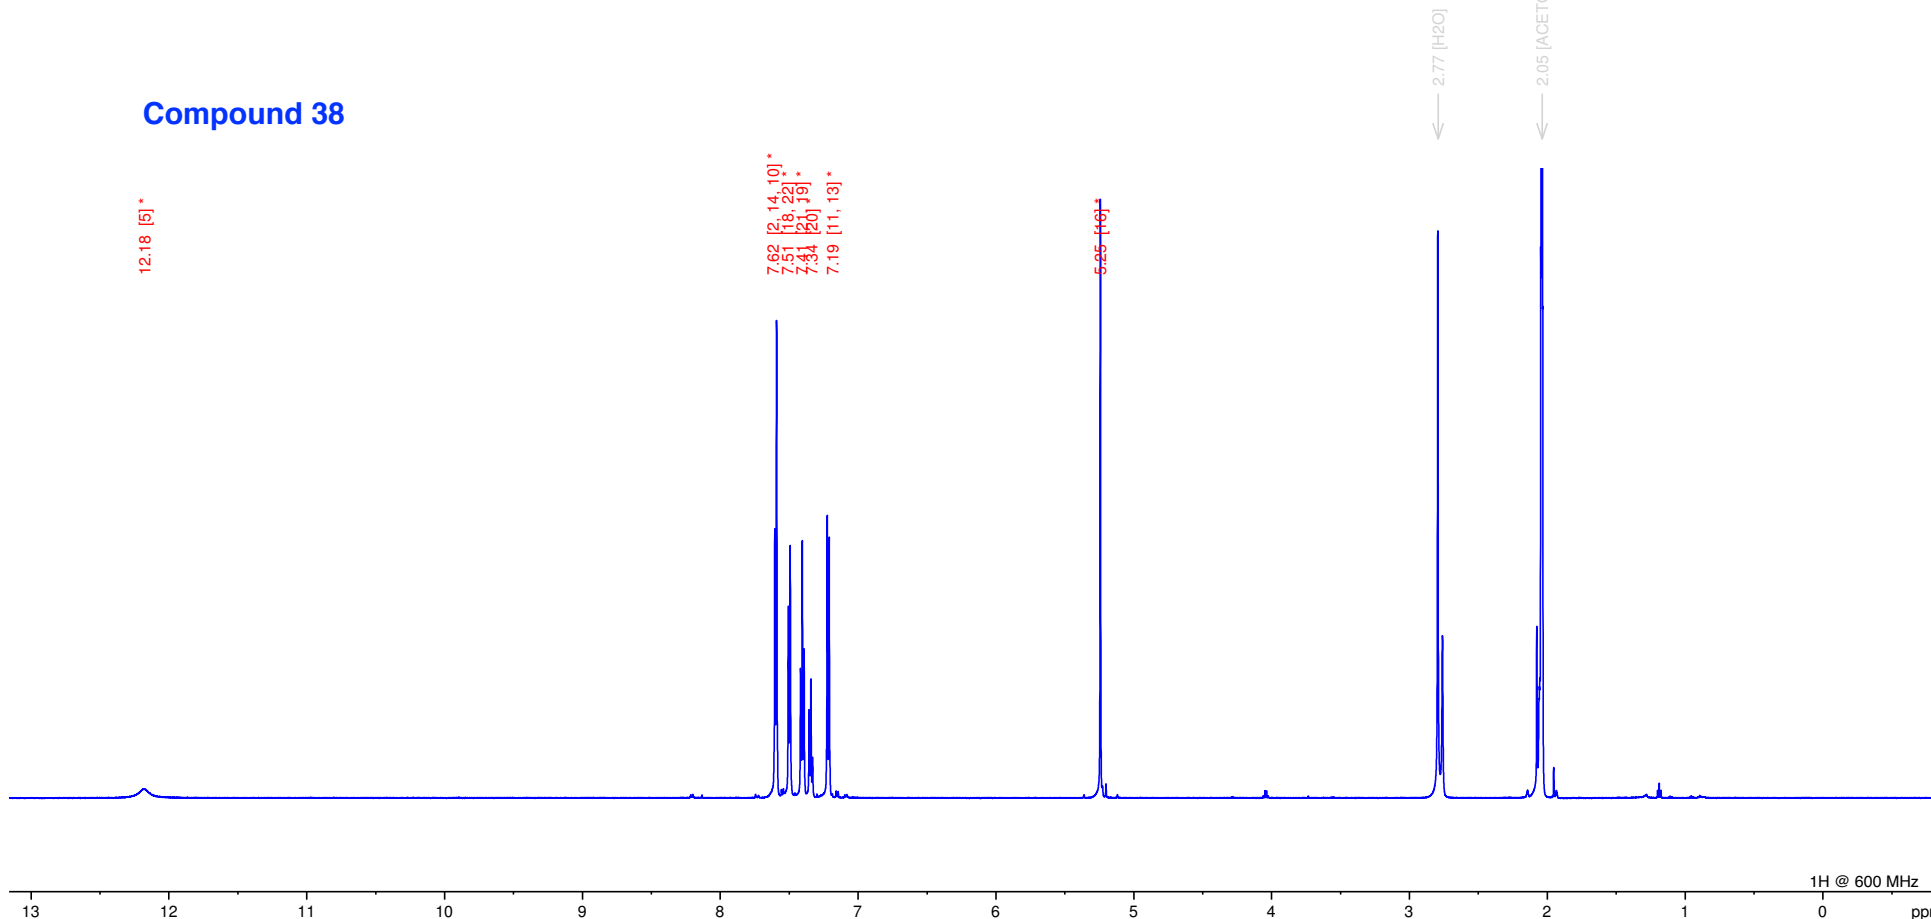

38 (JMT129)

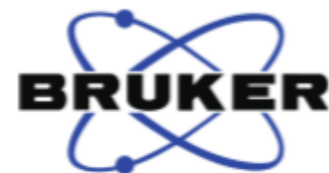

Current Data Parameters  
 NAME CMM210917  
 EXPNO 4  
 PROCNO 1

F2 - Acquisition Parameters  
 Date\_ 20210917  
 Time 11.51  
 INSTRUM spect  
 PROBHD 5 mm PATXI 1H/  
 PULPROG jmod  
 TD 65536  
 SOLVENT DMSO  
 NS 1000  
 DS 4  
 SWH 36057.691 Hz  
 FIDRES 0.550197 Hz  
 AQ 0.9087659 sec  
 RG 2050  
 DW 13.867 usec  
 DE 6.50 usec  
 TE 303.2 K  
 CNST2 145.000000  
 CNST11 1.000000  
 D1 2.0000000 sec  
 D20 0.00689655 sec  
 TD0 1

===== CHANNEL f1 =====  
 SFO1 150.9178988 MHz  
 NUC1 13C  
 P1 11.80 usec  
 P2 23.60 usec  
 PLW1 202.10000610 W

===== CHANNEL f2 =====  
 SFO2 600.1324005 MHz  
 NUC2 1H  
 CPDPRG2 waltz16  
 PCPD2 70.00 usec  
 PLW2 13.69999981 W  
 PLW12 0.17449000 W

F2 - Processing parameters  
 SI 32768  
 SF 150.9028090 MHz  
 WDW EM  
 SSB 0  
 LB 1.00 Hz  
 GB 0  
 PC 1.40

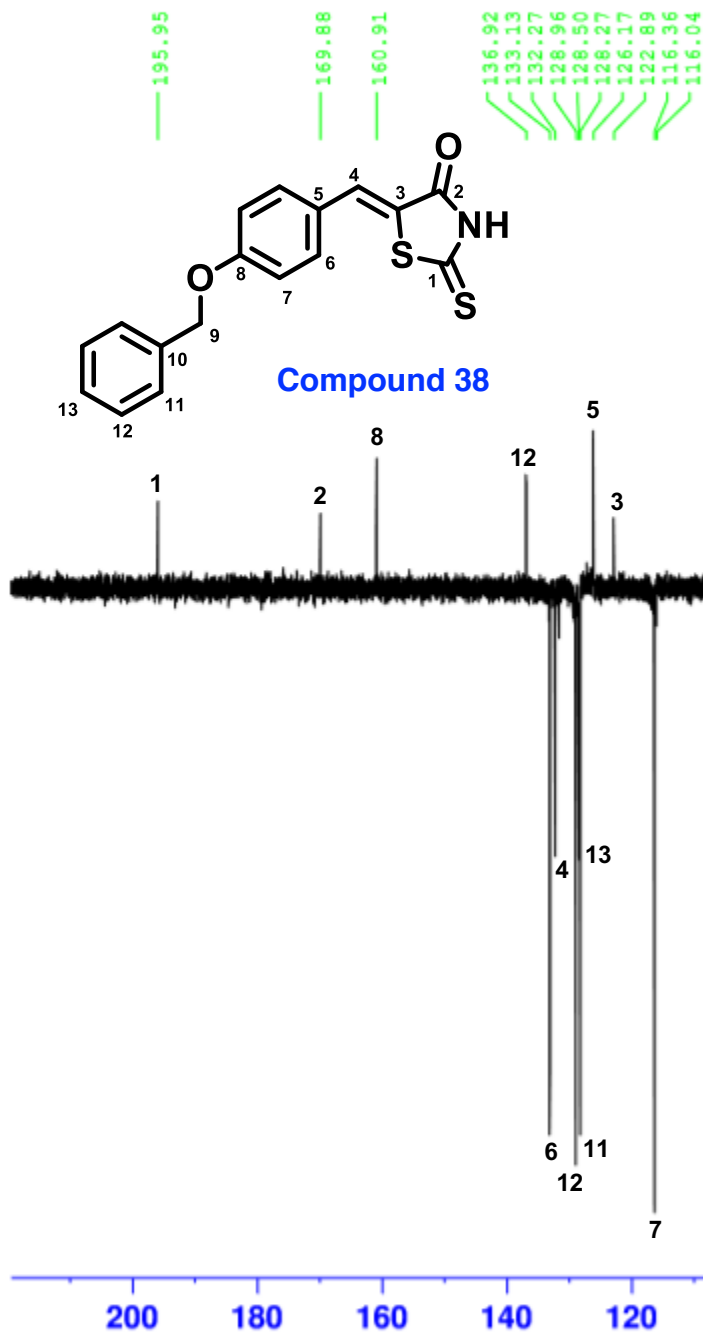

# SAMPLE INFORMATION

|                   |                          |                     |                                 |
|-------------------|--------------------------|---------------------|---------------------------------|
| Sample Name:      | 129                      | Acquired By:        | System                          |
| Sample Type:      | Unknown                  | Sample Set Name     | 103dx_JMT                       |
| Vial:             | 1:A,6                    | Acq. Method Set:    | ReversePhase_12min_Max Plot     |
| Injection #:      | 1                        | Processing Method:  | ReversePhase_Purity_MAX Plot    |
| Injection Volume: | 1.00 ul                  | Channel Name:       | PDA Max Plot 190.0 - 800.0      |
| Run Time:         | 12.0 Minutes             | Proc. Chnl. Descr.: | PDA MaxPlot (190.0 nm to 800.0) |
|                   |                          |                     |                                 |
| Date Acquired:    | 7/27/2021 7:43:54 PM EDT |                     |                                 |
| Date Processed:   | 8/31/2021 3:03:27 PM EDT |                     |                                 |

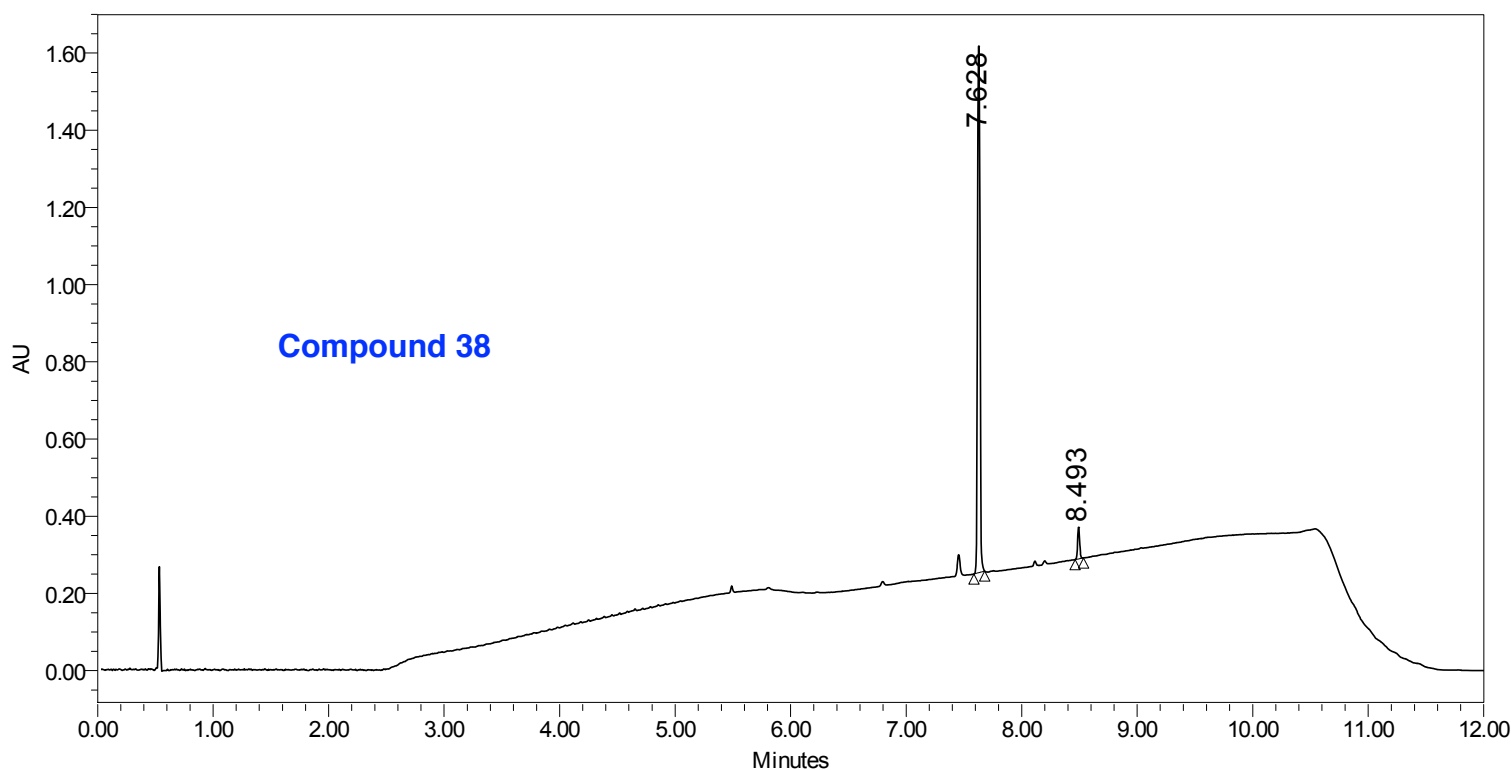

|   | RT    | Area    | % Area | Height  | Peak<br>Lambda Max. |
|---|-------|---------|--------|---------|---------------------|
| 1 | 7.628 | 2077553 | 95.35  | 1366786 | 392.4               |
| 2 | 8.493 | 101326  | 4.65   | 82128   | 236.1               |

JMT\_134

Consistency: Unknown\*, unknown  
purity\*

Data set 1H: JMT\_134 1 1 /opt/topspin4.1.3  
Structure: /opt/topspin4.1.3/JMT\_134/1/structure.mol  
Acquisition date: July 18, 2021 4:56:18 PM EDT  
Solvent: Acetone  
Probe: 5 mm PATXI 1H/D/19F-13C/15N Z-GRD Z855801/0017  
Eretic reference:

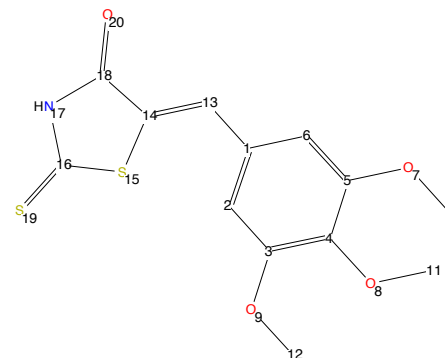

Sum formula:  
C<sub>13</sub>H<sub>13</sub>NO<sub>4</sub>S<sub>2</sub>

Molecular Mass:  
311.03 Da

**Comments:**  
Multiplet interpretation available for spectrum. Multiplet interpretation available for spectrum.  
A multiplet interpretation for all major signals in the spectrum could be found. All given impurities could be assigned to regions in the spectrum. A multiplet interpretation for all major signals in the spectrum could be found. All given impurities could be assigned to regions in the spectrum.

**Signature:**

Automatic analysis generated by Bruker CMC (b:17).  
One or more results have not been created by automatic analysis, or edited manually: marked by '\*'.  
Report generated by Bruker CMC-assist TopSpin 4.1.3 (of 2021-06-28 13:00:50), on 'MacBook-Pro.local' as 'tzbenton'

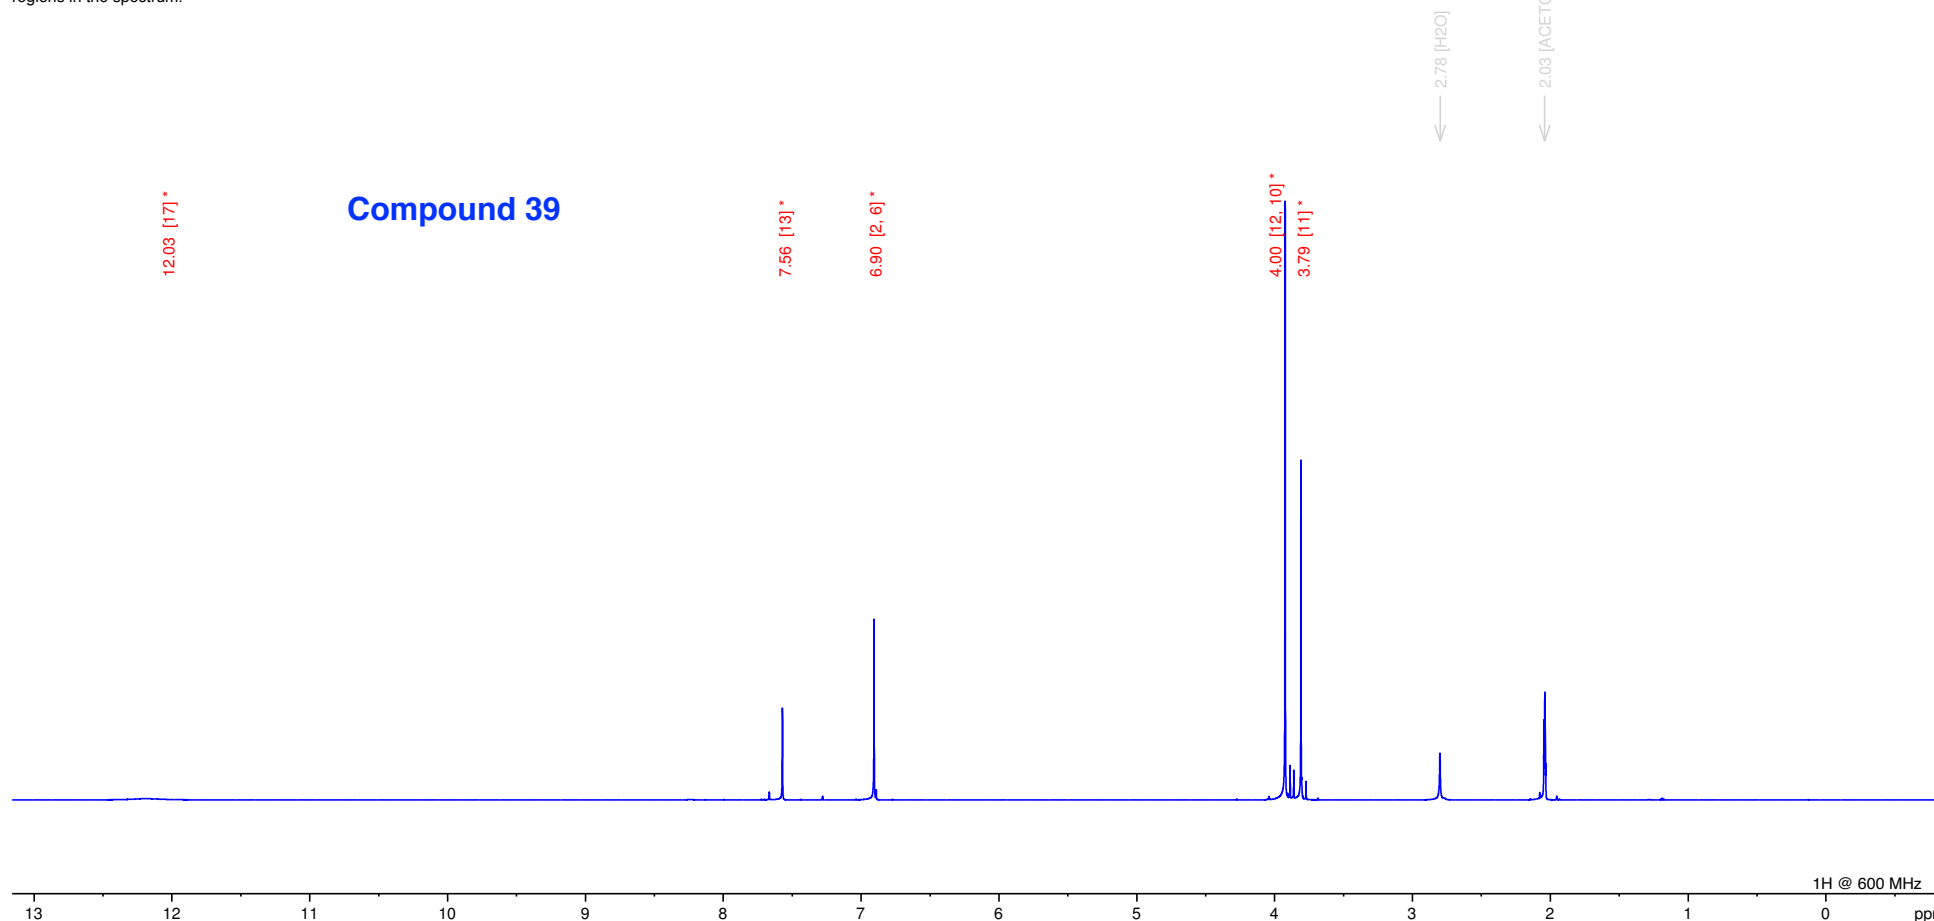



39 (JMT-134)

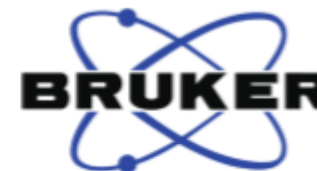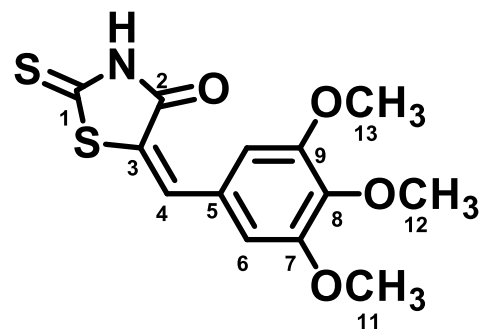

Compound 39

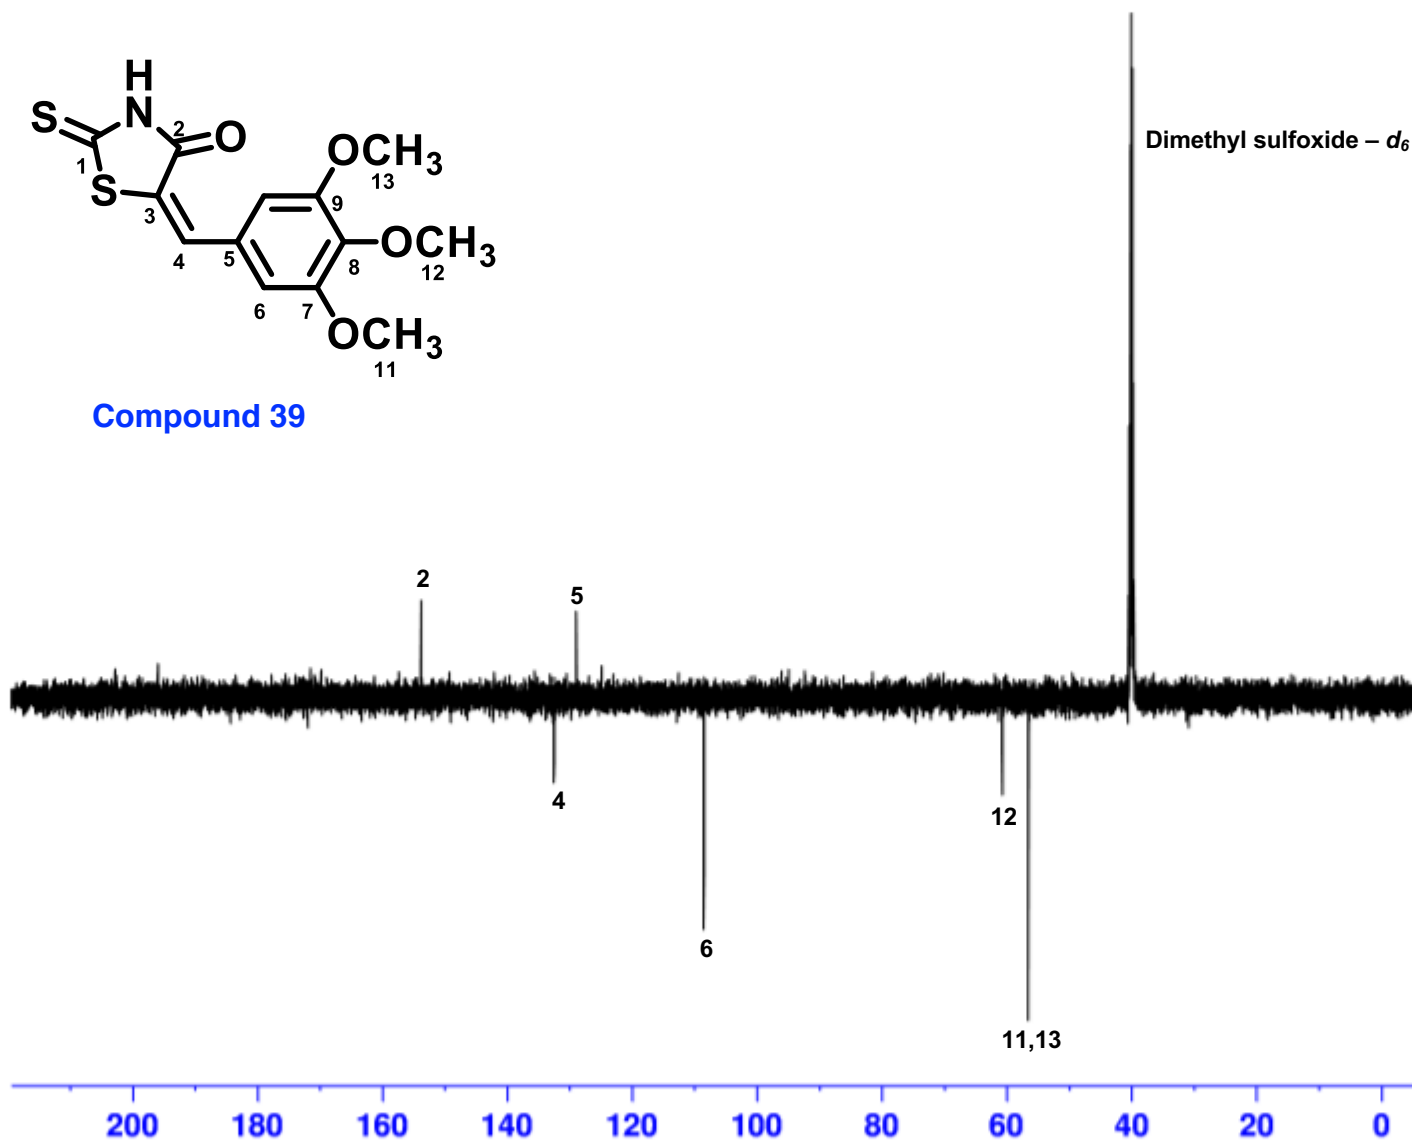

Current Data Parameters  
NAME CMM210916  
EXPNO 1  
PROCNO 1

F2 - Acquisition Parameters  
Date\_ 20210916  
Time 9.58  
INSTRUM spect  
PROBHD 5 mm PATXI 1H/  
PULPROG jmod  
TD 65536  
SOLVENT DMSO  
NS 1000  
DS 4  
SWH 36057.691 Hz  
FIDRES 0.550197 Hz  
AQ 0.9087659 sec  
RG 2050  
DW 13.867 usec  
DE 6.50 usec  
TE 301.3 K  
CNST2 145.0000000  
CNST11 1.0000000  
D1 2.00000000 sec  
D20 0.00689655 sec  
TD0 1

===== CHANNEL f1 =====  
SFO1 150.9178988 MHz  
NUC1 13C  
P1 11.80 usec  
P2 23.60 usec  
PLW1 202.10000610 W

===== CHANNEL f2 =====  
SFO2 600.1324005 MHz  
NUC2 1H  
CPDPRG[2] waltz16  
PCPD2 70.00 usec  
PLW2 13.69999981 W  
PLW12 0.17449000 W

F2 - Processing parameters  
SI 32768  
SF 150.9028090 MHz  
WDW EM  
SSB 0  
LB 1.00 Hz  
GB 0  
PC 1.40

# SAMPLE INFORMATION

|                                          |              |                     |                                 |
|------------------------------------------|--------------|---------------------|---------------------------------|
| Sample Name:                             | 134          | Acquired By:        | System                          |
| Sample Type:                             | Unknown      | Sample Set Name     | 103dx_JMT                       |
| Vial:                                    | 1:B,1        | Acq. Method Set:    | ReversePhase_12min_Max Plot     |
| Injection #:                             | 1            | Processing Method:  | ReversePhase_Purity_MAX Plot    |
| Injection Volume:                        | 1.00 ul      | Channel Name:       | PDA Max Plot 190.0 - 800.0      |
| Run Time:                                | 12.0 Minutes | Proc. Chnl. Descr.: | PDA MaxPlot (190.0 nm to 800.0) |
| Date Acquired: 7/27/2021 8:21:34 PM EDT  |              |                     |                                 |
| Date Processed: 8/31/2021 3:06:18 PM EDT |              |                     |                                 |

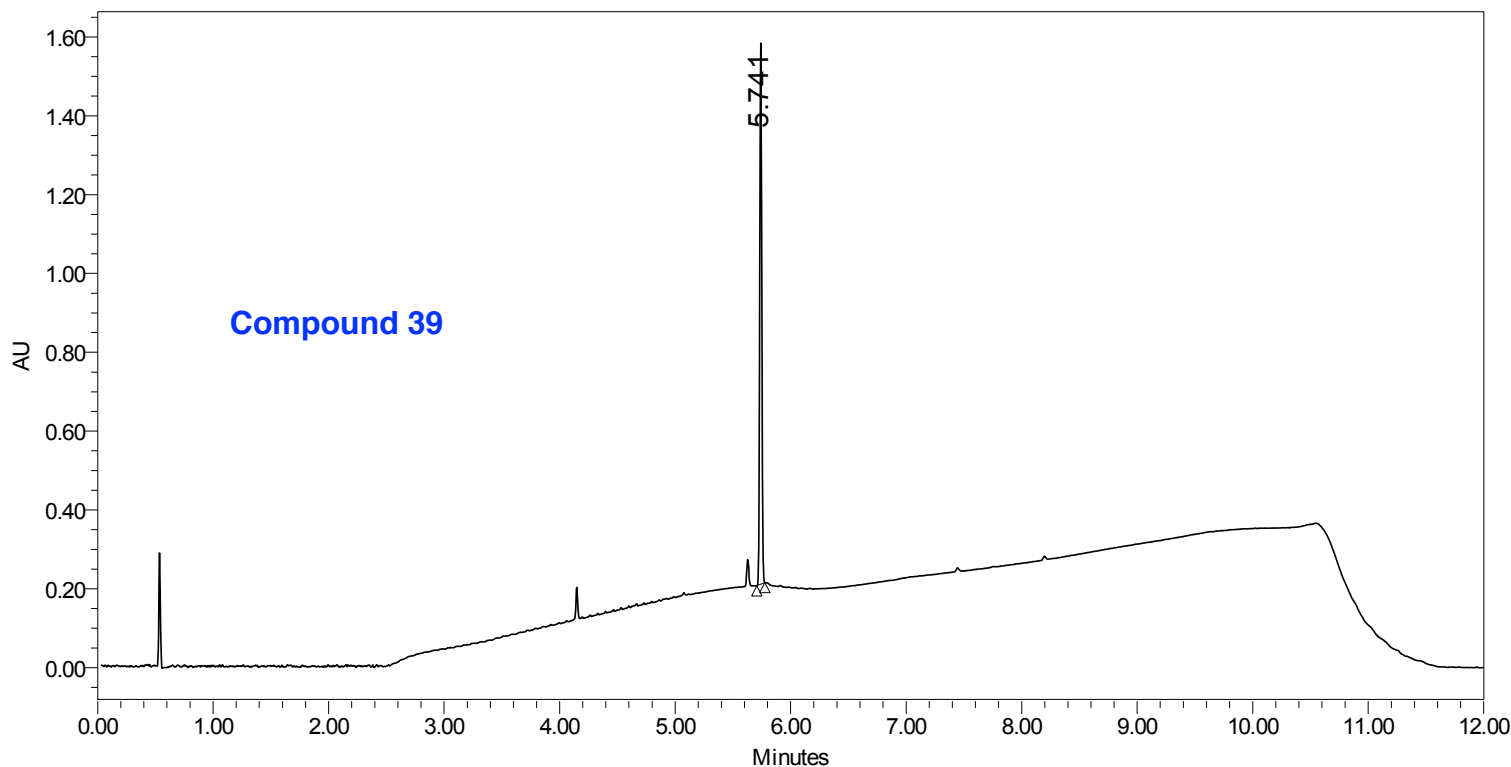

|   | RT    | Area    | % Area | Height  | Peak<br>Lambda Max. |
|---|-------|---------|--------|---------|---------------------|
| 1 | 5.741 | 1697320 | 100.00 | 1375780 | 392.4               |

JMT\_144

Consistency: Unknown\*, unknown  
purity\*

Data set 1H: JMT\_144 1 1 /opt/topspin4.1.3  
Structure: /opt/topspin4.1.3/JMT\_144/1/structure.mol  
Acquisition date: July 19, 2021 2:35:45 PM EDT  
Solvent: Acetone  
Probe: 5 mm PATXI 1H/D/19F-13C/15N Z-GRD Z855801/0017  
Eretic reference:

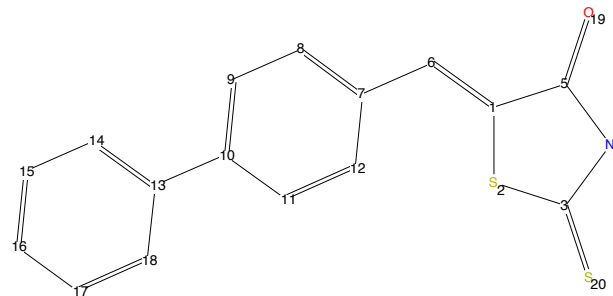

Sum formula:  
C<sub>16</sub>H<sub>11</sub>NOS<sub>2</sub>

Molecular Mass:  
297.03 Da

**Comments:**  
Multiplet interpretation available for spectrum.  
A multiplet interpretation for all major signals in the spectrum could be found. All given impurities could be assigned to regions in the spectrum.

**Signature:**

Automatic analysis generated by Bruker CMC (b:17).  
One or more results have not been created by automatic analysis, or edited manually: marked by '\*'.  
Report generated by Bruker CMC-assist TopSpin 4.1.3 (of 2021-06-28 13:00:50), on 'MacBook-Pro.local' as 'tzbenton'

Compound 40

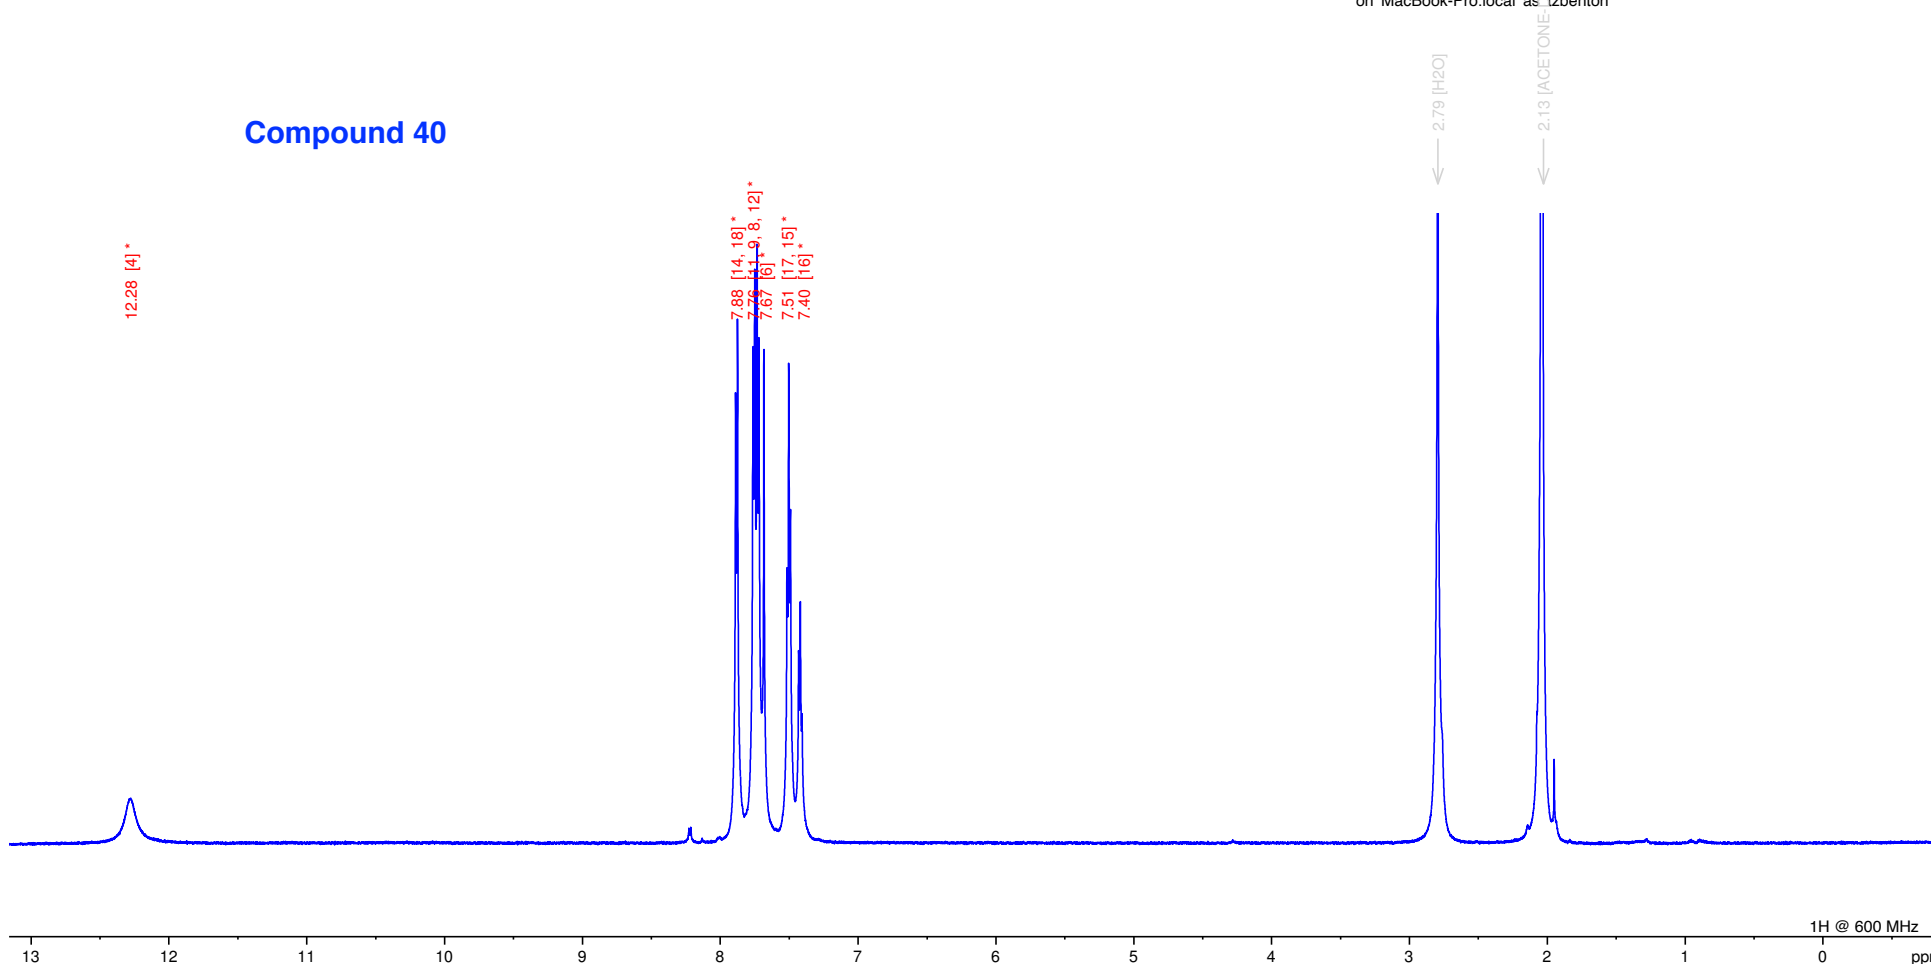

40 (JMT-144)

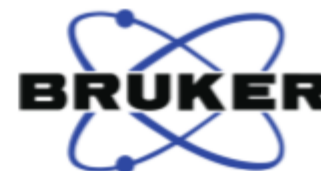

Current Data Parameters  
NAME CMM210916  
EXPNO 6  
PROCNO 1

F2 - Acquisition Parameters  
Date\_ 20210916  
Time 15.19  
INSTRUM spect  
PROBHD 5 mm PATXI 1H/  
PULPROG jmod  
TD 65536  
SOLVENT DMSO  
NS 1000  
DS 4  
SWH 36057.691 Hz  
FIDRES 0.550197 Hz  
AQ 0.9087659 sec  
RG 2050  
DW 13.867 usec  
DE 6.50 usec  
TE 301.2 K  
CNST2 145.000000  
CNST11 1.000000  
D1 2.0000000 sec  
D20 0.00689655 sec  
TD0 1

===== CHANNEL f1 =====  
SFO1 150.9178988 MHz  
NUC1 13C  
P1 11.80 usec  
P2 23.60 usec  
PLW1 202.10000610 W

===== CHANNEL f2 =====  
SFO2 600.1324005 MHz  
NUC2 1H  
CPDPRG[2] waltz16  
PCPD2 70.00 usec  
PLW2 13.69999981 W  
PLW12 0.17449000 W

F2 - Processing parameters  
SI 32768  
SF 150.9028090 MHz  
WDW EM  
SSB 0  
LB 1.00 Hz  
GB 0  
PC 1.40

Compound 40

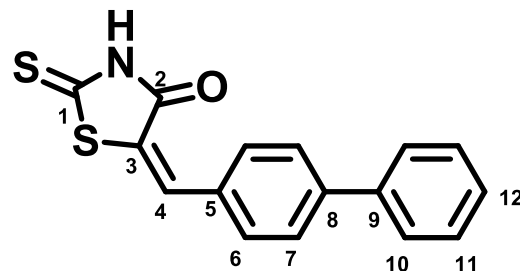

Dimethyl sulfoxide - d<sub>6</sub>

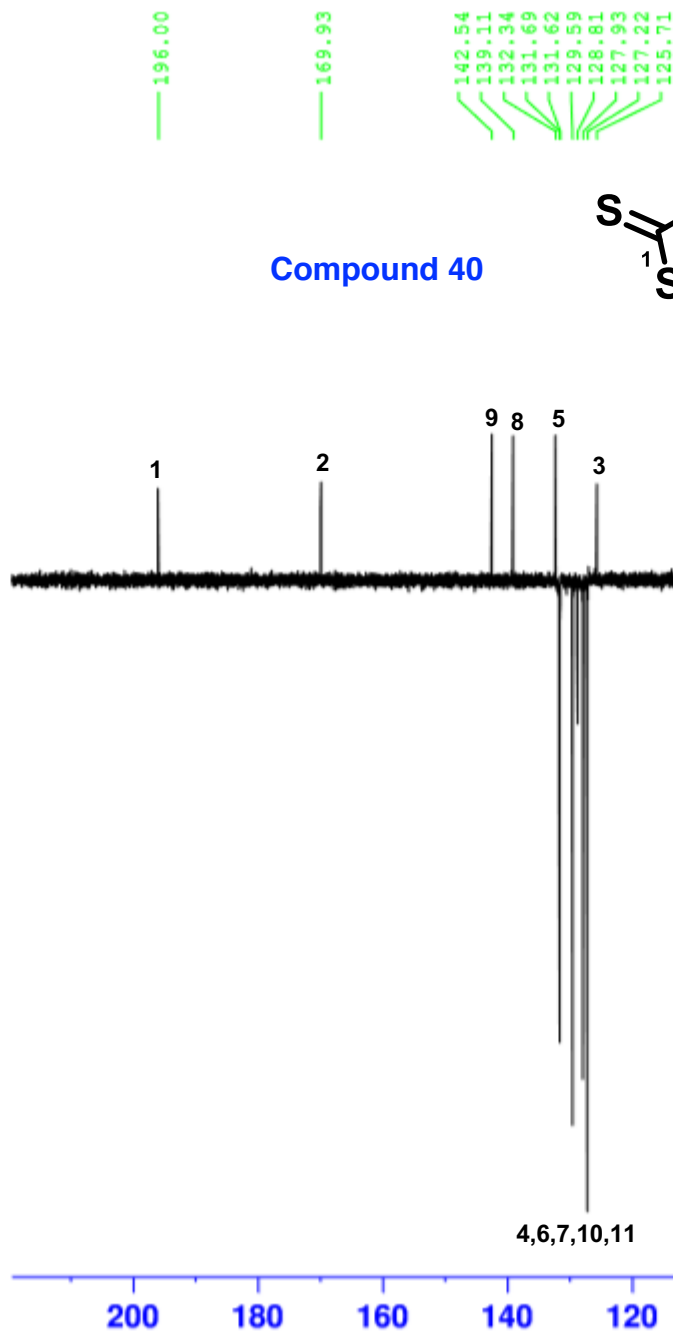

# SAMPLE INFORMATION

|                                          |              |                     |                                 |
|------------------------------------------|--------------|---------------------|---------------------------------|
| Sample Name:                             | 144          | Acquired By:        | System                          |
| Sample Type:                             | Unknown      | Sample Set Name     | 103dx_JMT                       |
| Vial:                                    | 1:A,5        | Acq. Method Set:    | ReversePhase_12min_Max Plot     |
| Injection #:                             | 1            | Processing Method:  | ReversePhase_Purity_MAX Plot    |
| Injection Volume:                        | 1.00 ul      | Channel Name:       | PDA Max Plot 190.0 - 800.0      |
| Run Time:                                | 12.0 Minutes | Proc. Chnl. Descr.: | PDA MaxPlot (190.0 nm to 800.0) |
| Date Acquired: 7/27/2021 7:31:19 PM EDT  |              |                     |                                 |
| Date Processed: 8/31/2021 3:36:51 PM EDT |              |                     |                                 |

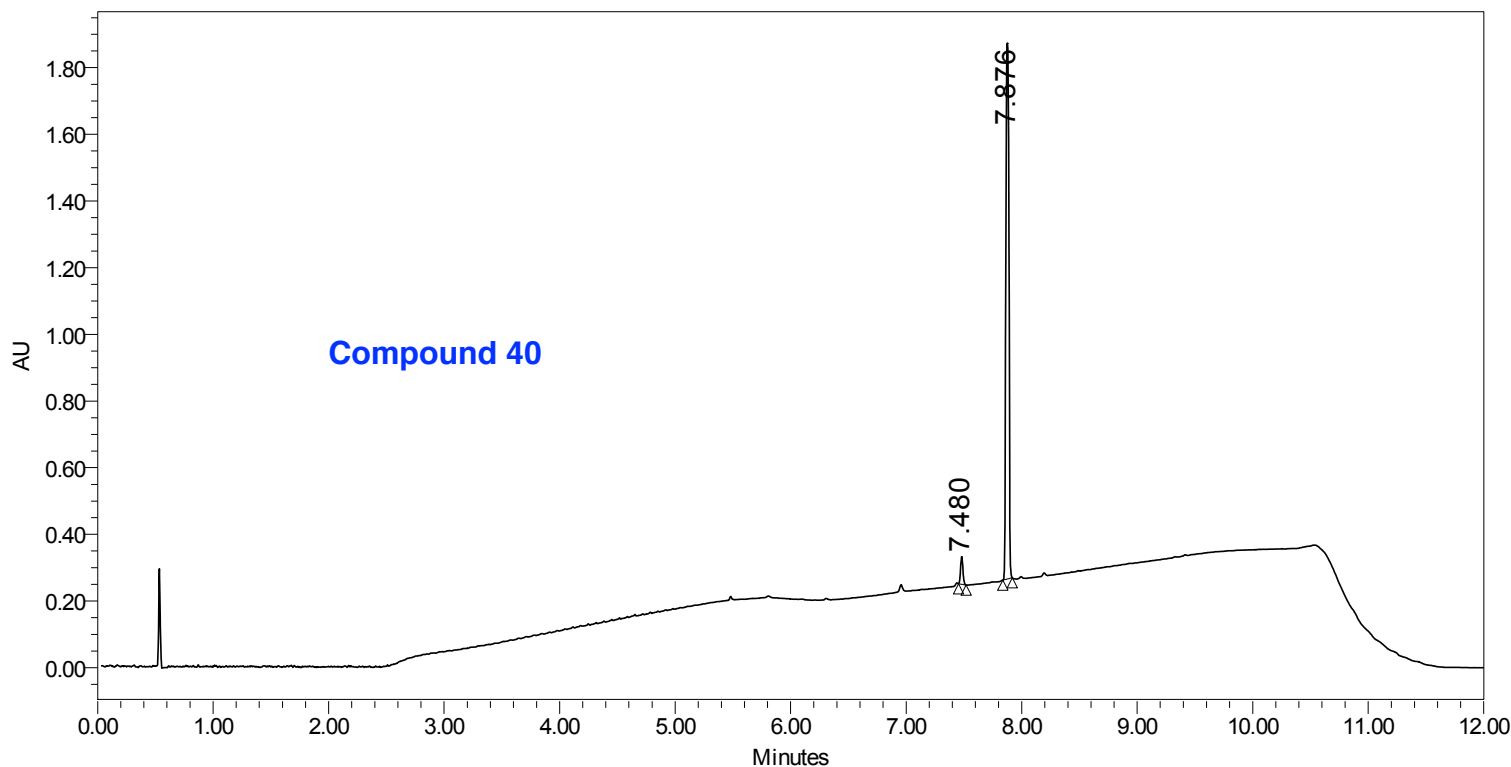

|   | RT    | Area    | % Area | Height  | Peak<br>Lambda Max. |
|---|-------|---------|--------|---------|---------------------|
| 1 | 7.480 | 115051  | 3.72   | 82555   | 394.3               |
| 2 | 7.876 | 2978135 | 96.28  | 1608789 | 388.1               |

**Consistency: Unknown\*, unknown  
purity\***

**Comments:**  
 Multiplet interpretation available for spectrum.  
 A multiplet interpretation for all major signals in the spectrum could be found. All given impurities could be assigned to regions in the spectrum.

**Signature:**

Automatic analysis generated by Bruker CMC (b:17).  
One or more results have not been created by automatic analysis, or edited manually: marked by '\*'.  
Report generated by Bruker CMC-assist TopSpin 4.1.3 (of 2021-06-28 13:00:50),  
on 'MacBook-Pro.local' as 'tzbenton'

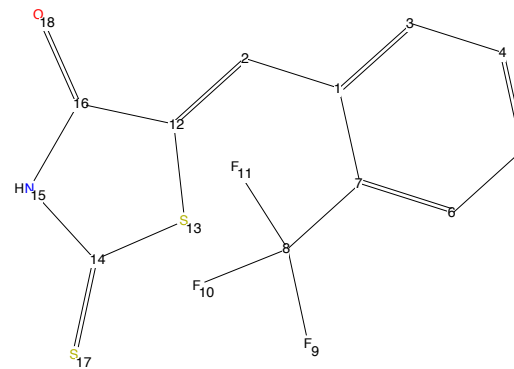

Sum formula:  
 $C_{11}H_6F_3NOS_2$

Molecular Mass:  
288.98 Da

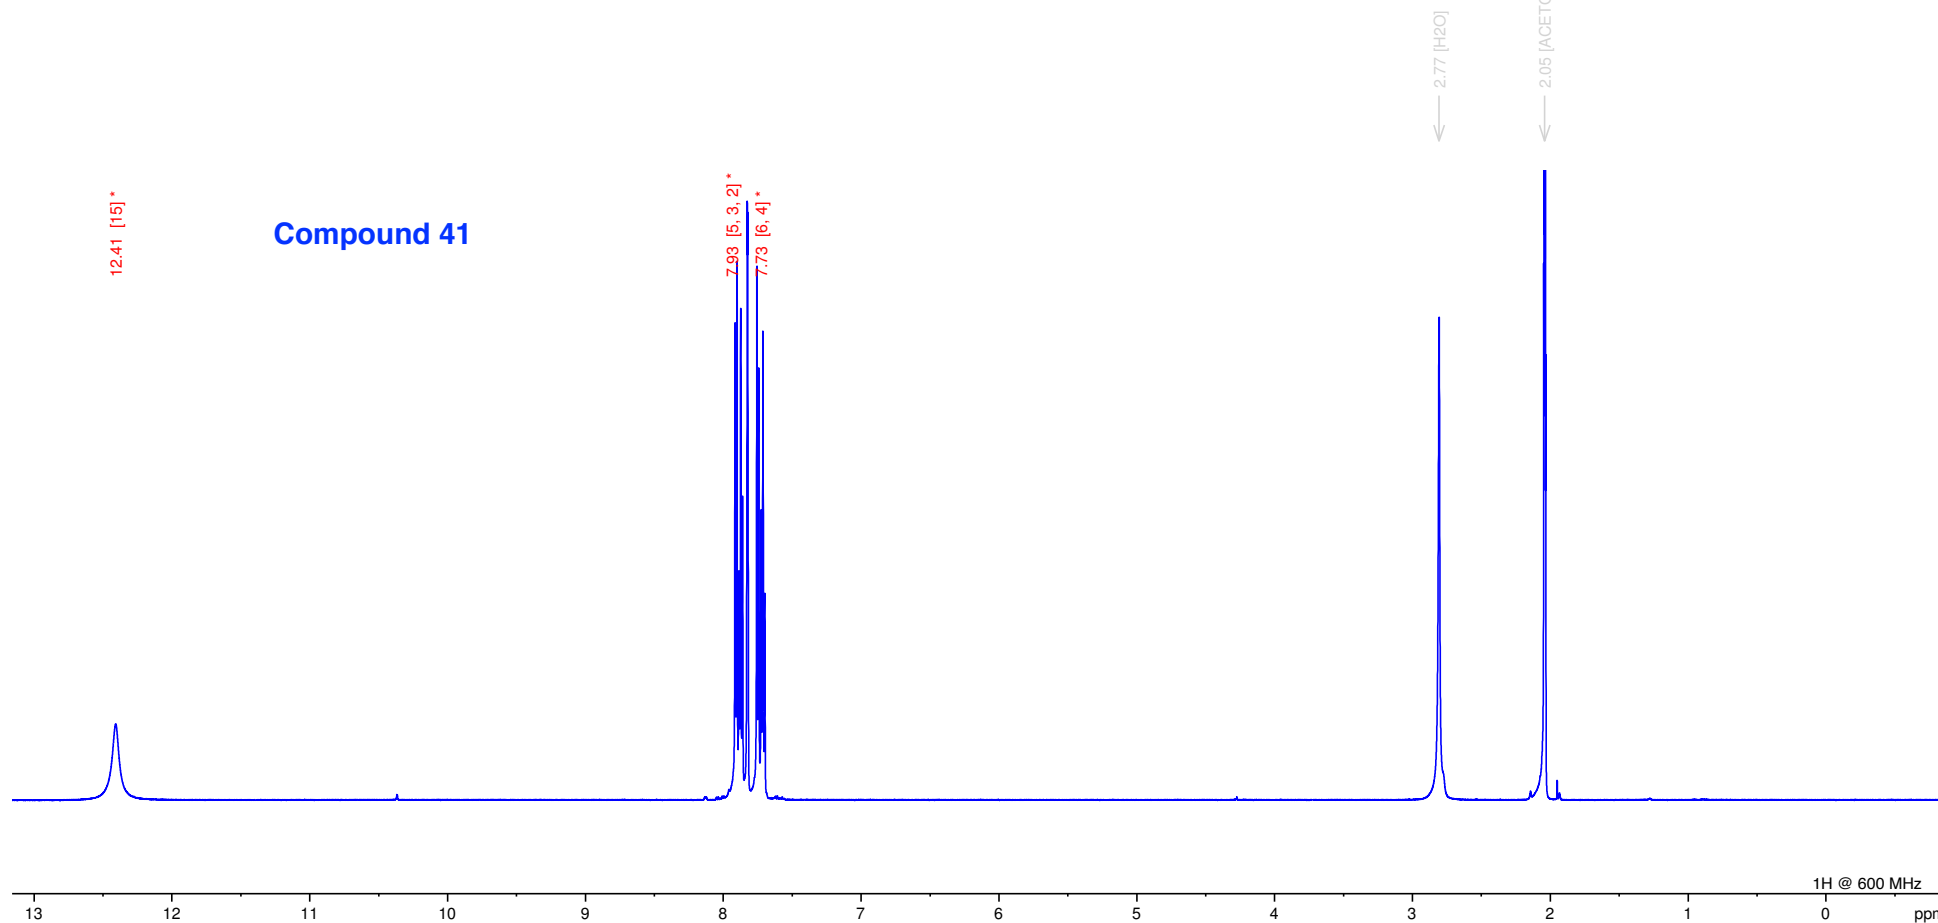

41 (JMT-187)

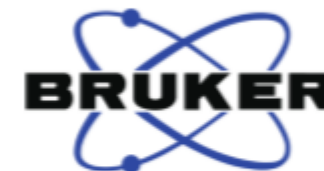

Current Data Parameters  
 NAME CMM210915  
 EXPNO 7  
 PROCNO 1

F2 - Acquisition Parameters  
 Date\_ 20210915  
 Time 16.17  
 INSTRUM spect  
 PROBHD 5 mm PATXI 1H/  
 PULPROG jmod  
 TD 65536  
 SOLVENT DMSO  
 NS 1000  
 DS 4  
 SWH 36057.691 Hz  
 FIDRES 0.550197 Hz  
 AQ 0.9087659 sec  
 RG 2050  
 DW 13.867 usec  
 DE 6.50 usec  
 TE 301.3 K  
 CNST2 145.0000000  
 CNST11 1.0000000  
 D1 2.00000000 sec  
 D20 0.00689655 sec  
 TD0 1

===== CHANNEL f1 =====  
 SFO1 150.9178988 MHz  
 NUC1 13C  
 P1 11.80 usec  
 P2 23.60 usec  
 PLW1 202.10000610 W

===== CHANNEL f2 =====  
 SFO2 600.1324005 MHz  
 NUC2 1H  
 CPDPRG[2] waltz16  
 PCPD2 70.00 usec  
 PLW2 13.69999981 W  
 PLW12 0.17449000 W

F2 - Processing parameters  
 SI 32768  
 SF 150.9028090 MHz  
 WDW EM  
 SSB 0  
 LB 1.00 Hz  
 GB 0  
 PC 1.40

Compound 41

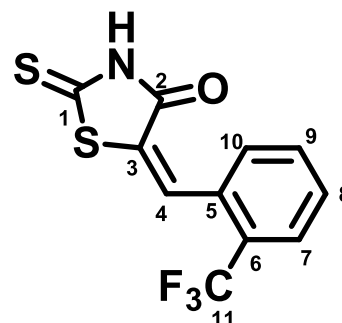

Dimethyl sulfoxide - d<sub>6</sub>

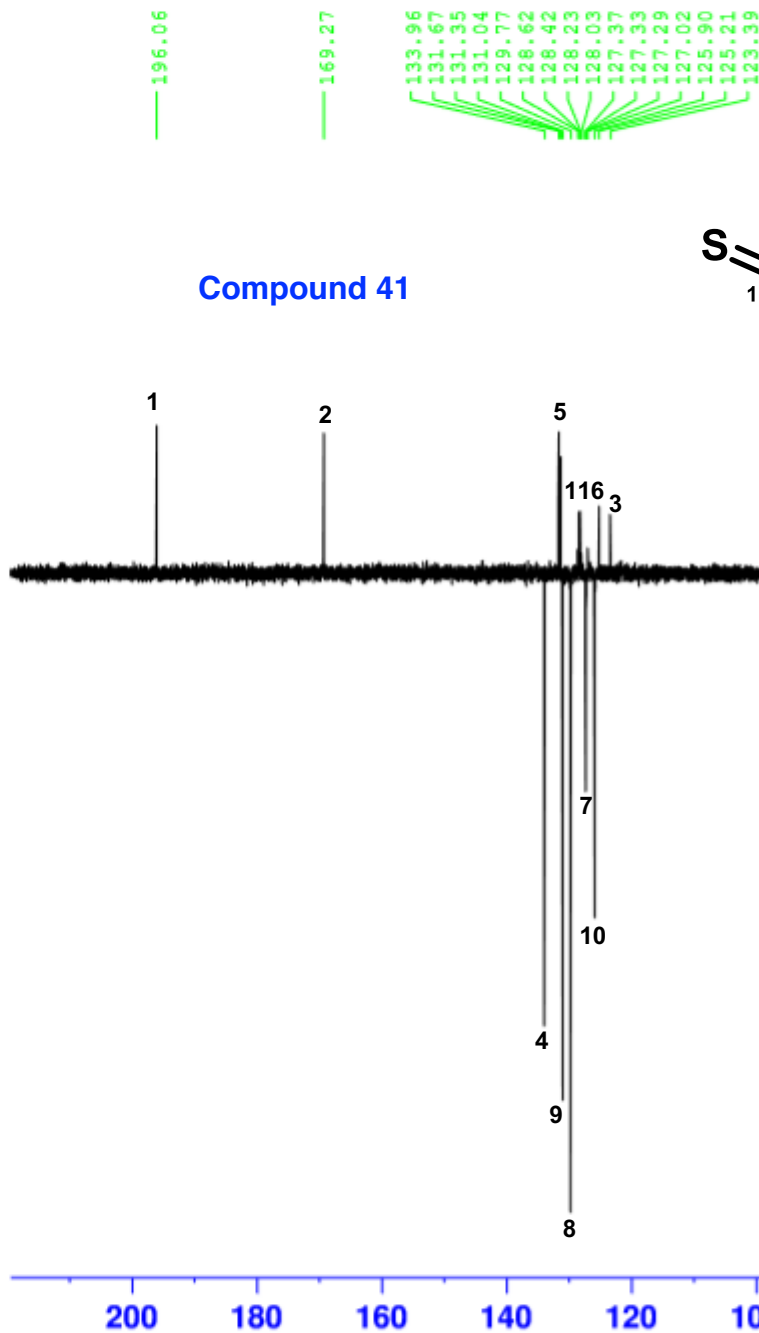

# SAMPLE INFORMATION

|                                          |              |                     |                                 |
|------------------------------------------|--------------|---------------------|---------------------------------|
| Sample Name:                             | 187          | Acquired By:        | System                          |
| Sample Type:                             | Unknown      | Sample Set Name     | 103dx_JMT                       |
| Vial:                                    | 1:A,4        | Acq. Method Set:    | ReversePhase_12min_Max Plot     |
| Injection #:                             | 1            | Processing Method:  | ReversePhase_Purity_MAX Plot    |
| Injection Volume:                        | 1.00 ul      | Channel Name:       | PDA Max Plot 190.0 - 800.0      |
| Run Time:                                | 12.0 Minutes | Proc. Chnl. Descr.: | PDA MaxPlot (190.0 nm to 800.0) |
| Date Acquired: 7/27/2021 7:18:44 PM EDT  |              |                     |                                 |
| Date Processed: 8/31/2021 3:57:16 PM EDT |              |                     |                                 |

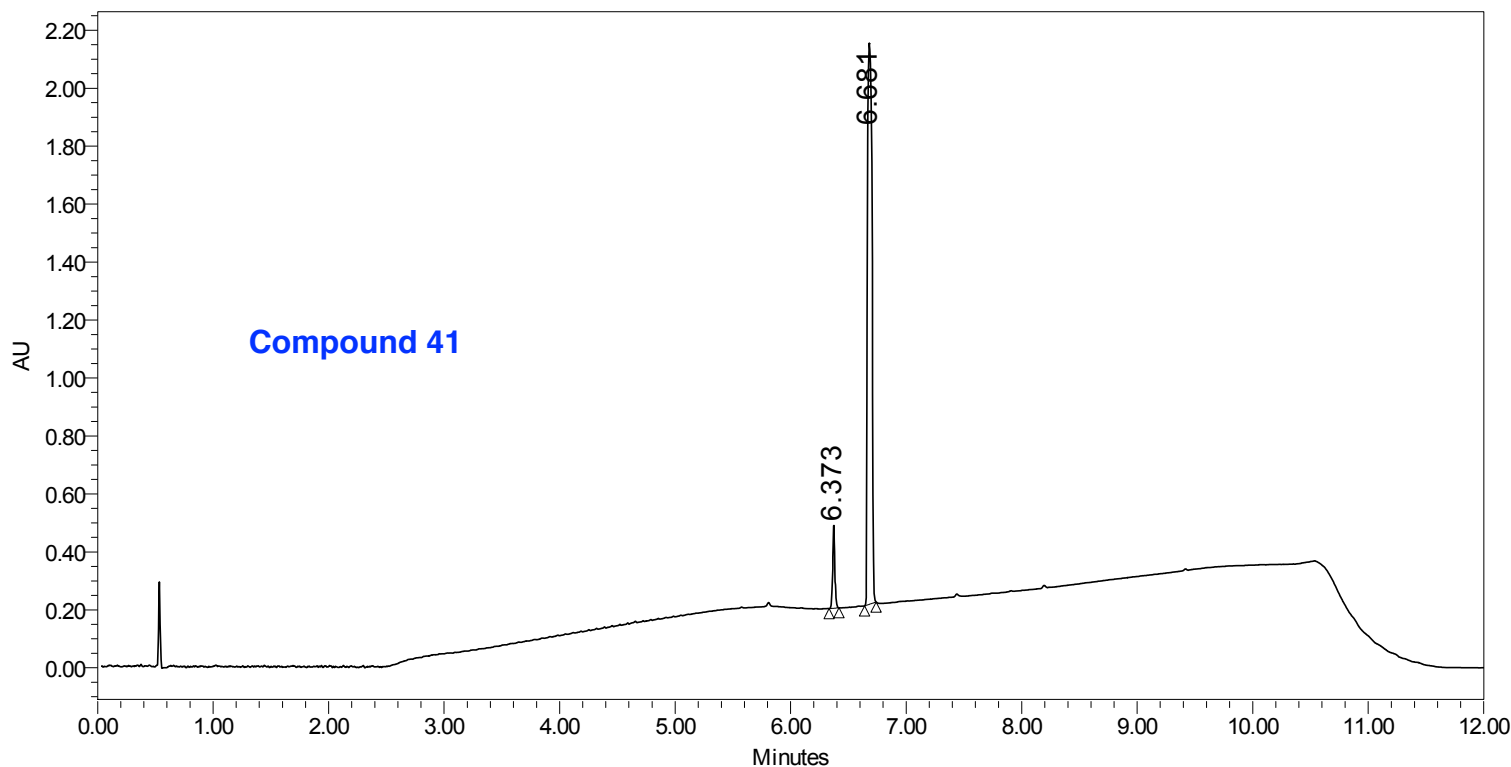

|   | RT    | Area    | % Area | Height  | Peak<br>Lambda Max. |
|---|-------|---------|--------|---------|---------------------|
| 1 | 6.373 | 374327  | 6.75   | 286232  | 345.8               |
| 2 | 6.681 | 5174718 | 93.25  | 1936031 | 275.3               |



JMT\_188

Consistency: Unknown\*, unknown  
purity\*

Data set 1H: JMT\_188 1 1 /opt/topspin4.1.3  
Structure: /opt/topspin4.1.3/JMT\_188/1/structure.mol  
Acquisition date: July 18, 2021 5:06:13 PM EDT  
Solvent: Acetone  
Probe: 5 mm PATXI 1H/D/19F-13C/15N Z-GRD Z855801/0017  
Eretic reference:

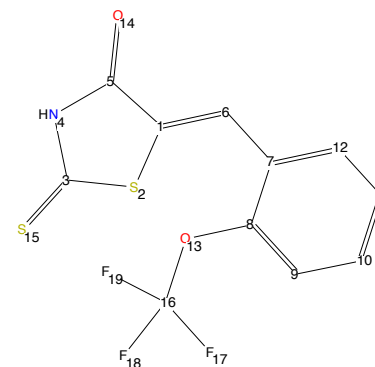

Sum formula:  
C<sub>11</sub>H<sub>6</sub>F<sub>3</sub>NO<sub>2</sub>S<sub>2</sub>

Molecular Mass:  
304.98 Da

**Comments:**  
Multiplet interpretation available for spectrum.  
A multiplet interpretation for all major signals in the spectrum could be found. All given impurities could be assigned to regions in the spectrum.

**Signature:**

Automatic analysis generated by Bruker CMC (b:17).  
One or more results have not been created by automatic analysis, or edited manually: marked by '\*'.  
Report generated by Bruker CMC-assist TopSpin 4.1.3 (of 2021-06-28 13:00:50), on 'MacBook-Pro.local' as 'tzbenton'

Compound 42

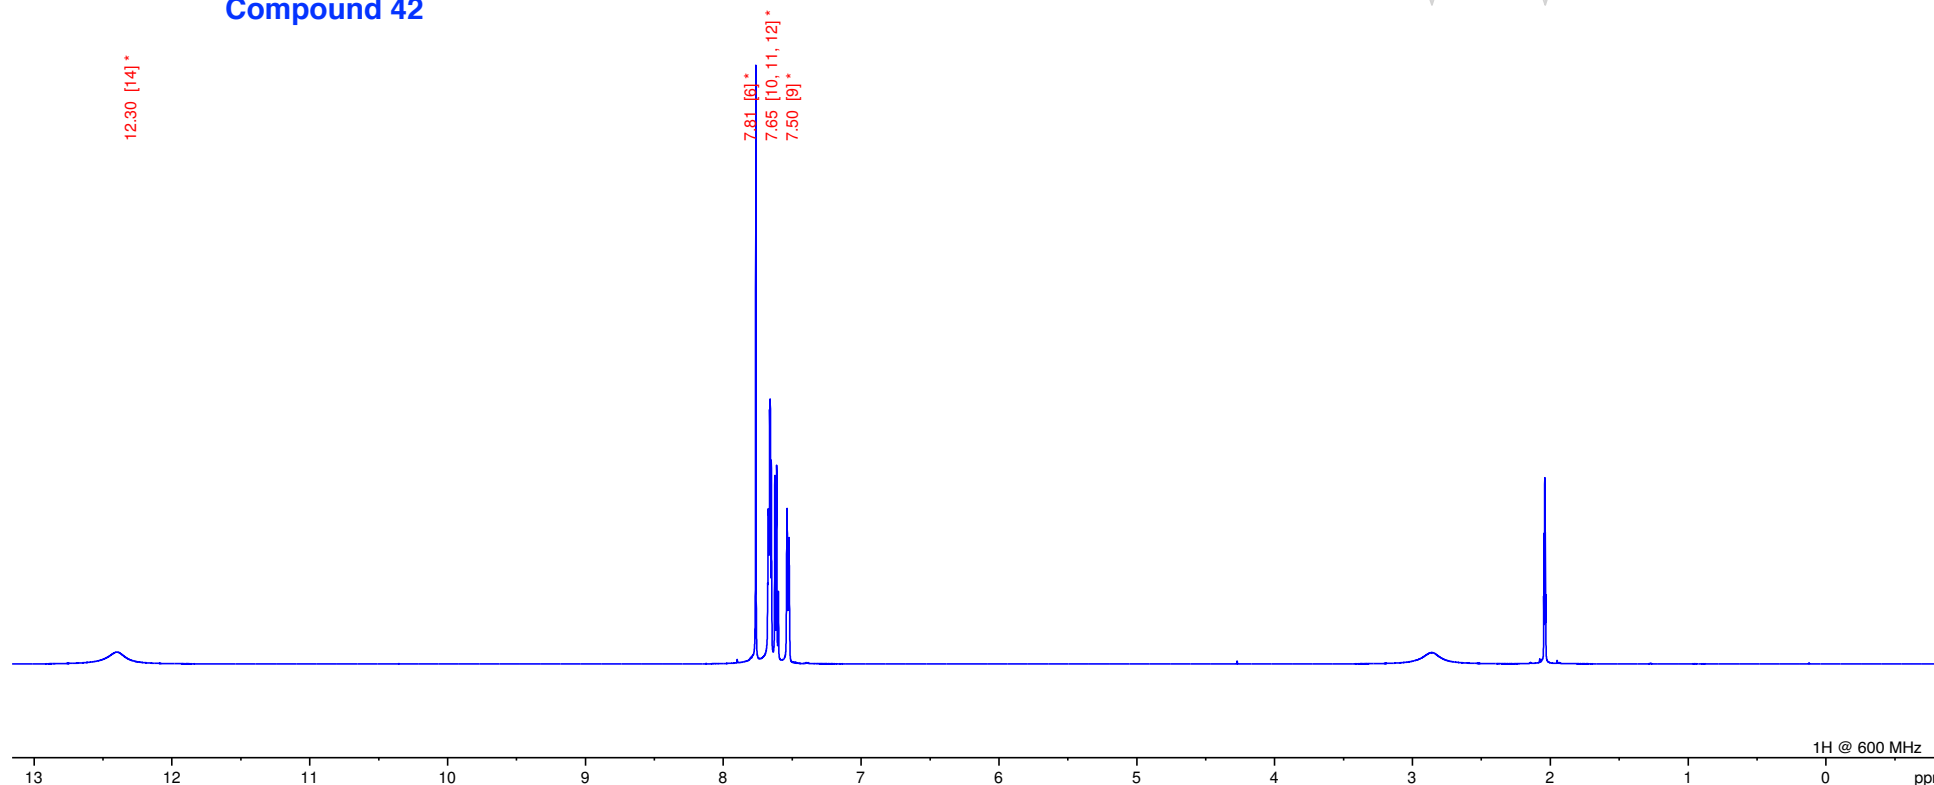

42 (JMT-188)

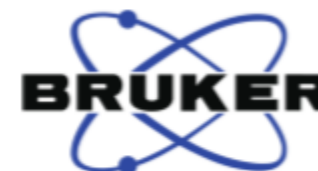

Compound 42

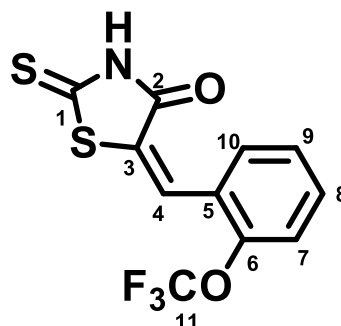

Dimethyl sulfoxide -  $d_6$

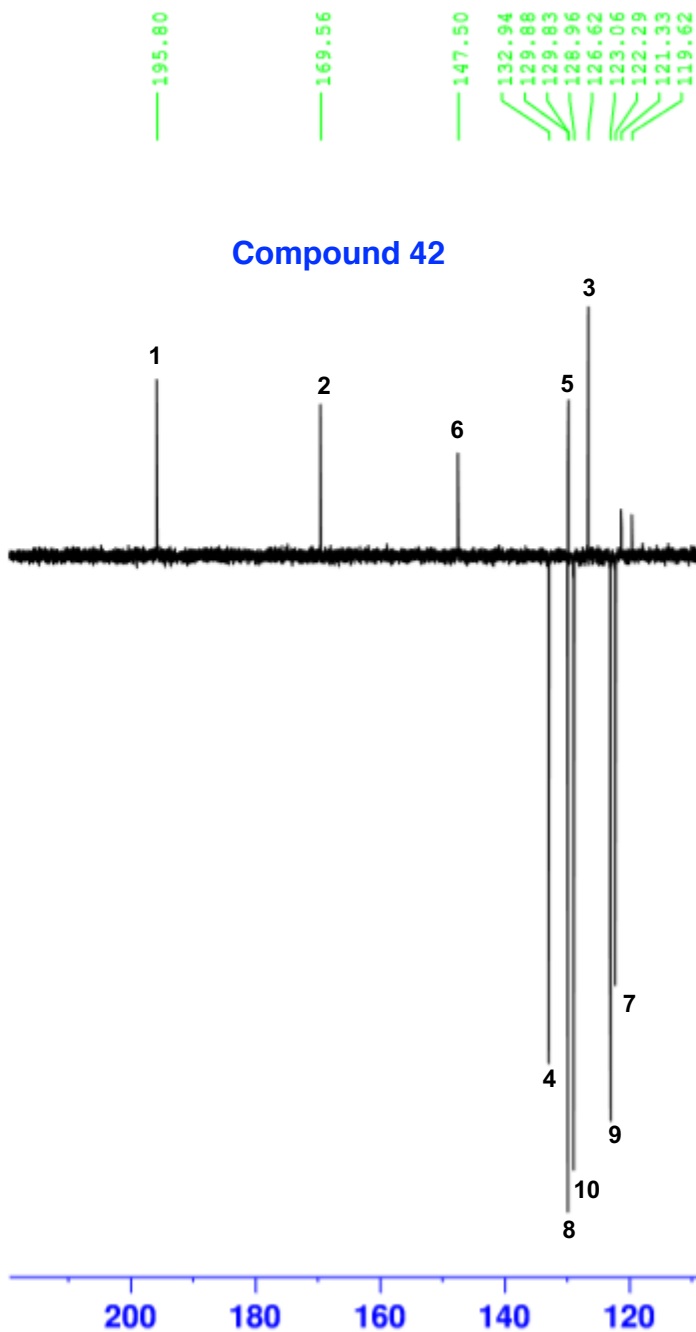

Current Data Parameters  
NAME CMM210915  
EXPNO 8  
PROCNO 1

F2 - Acquisition Parameters  
Date\_ 20210915  
Time 17.10  
INSTRUM spect  
PROBHD 5 mm PATXI 1H/  
PULPROG jmod  
TD 65536  
SOLVENT DMSO  
NS 1000  
DS 4  
SWH 36057.691 Hz  
FIDRES 0.550197 Hz  
AQ 0.9087659 sec  
RG 2050  
DW 13.867 usec  
DE 6.50 usec  
TE 301.4 K  
CNST2 145.0000000  
CNST11 1.0000000  
D1 2.00000000 sec  
D20 0.00689655 sec  
TD0 1

===== CHANNEL f1 =====  
SF01 150.9178988 MHz  
NUC1 13C  
P1 11.80 usec  
P2 23.60 usec  
PLW1 202.10000610 W

===== CHANNEL f2 =====  
SF02 600.1324005 MHz  
NUC2 1H  
CPDPRG[2] waltz16  
PCPD2 70.00 usec  
PLW2 13.69999981 W  
PLW12 0.17449000 W

F2 - Processing parameters  
SI 32768  
SF 150.9028090 MHz  
WDW EM  
SSB 0  
LB 1.00 Hz  
GB 0  
PC 1.40

# SAMPLE INFORMATION

|                   |                          |                     |                                 |
|-------------------|--------------------------|---------------------|---------------------------------|
| Sample Name:      | 188                      | Acquired By:        | System                          |
| Sample Type:      | Unknown                  | Sample Set Name     | 103dx_JMT                       |
| Vial:             | 1:A,2                    | Acq. Method Set:    | ReversePhase_12min_Max Plot     |
| Injection #:      | 1                        | Processing Method:  | ReversePhase_Purity_MAX Plot    |
| Injection Volume: | 1.00 ul                  | Channel Name:       | PDA Max Plot 190.0 - 800.0      |
| Run Time:         | 12.0 Minutes             | Proc. Chnl. Descr.: | PDA MaxPlot (190.0 nm to 800.0) |
|                   |                          |                     |                                 |
| Date Acquired:    | 7/27/2021 6:53:33 PM EDT |                     |                                 |
| Date Processed:   | 8/31/2021 3:58:18 PM EDT |                     |                                 |

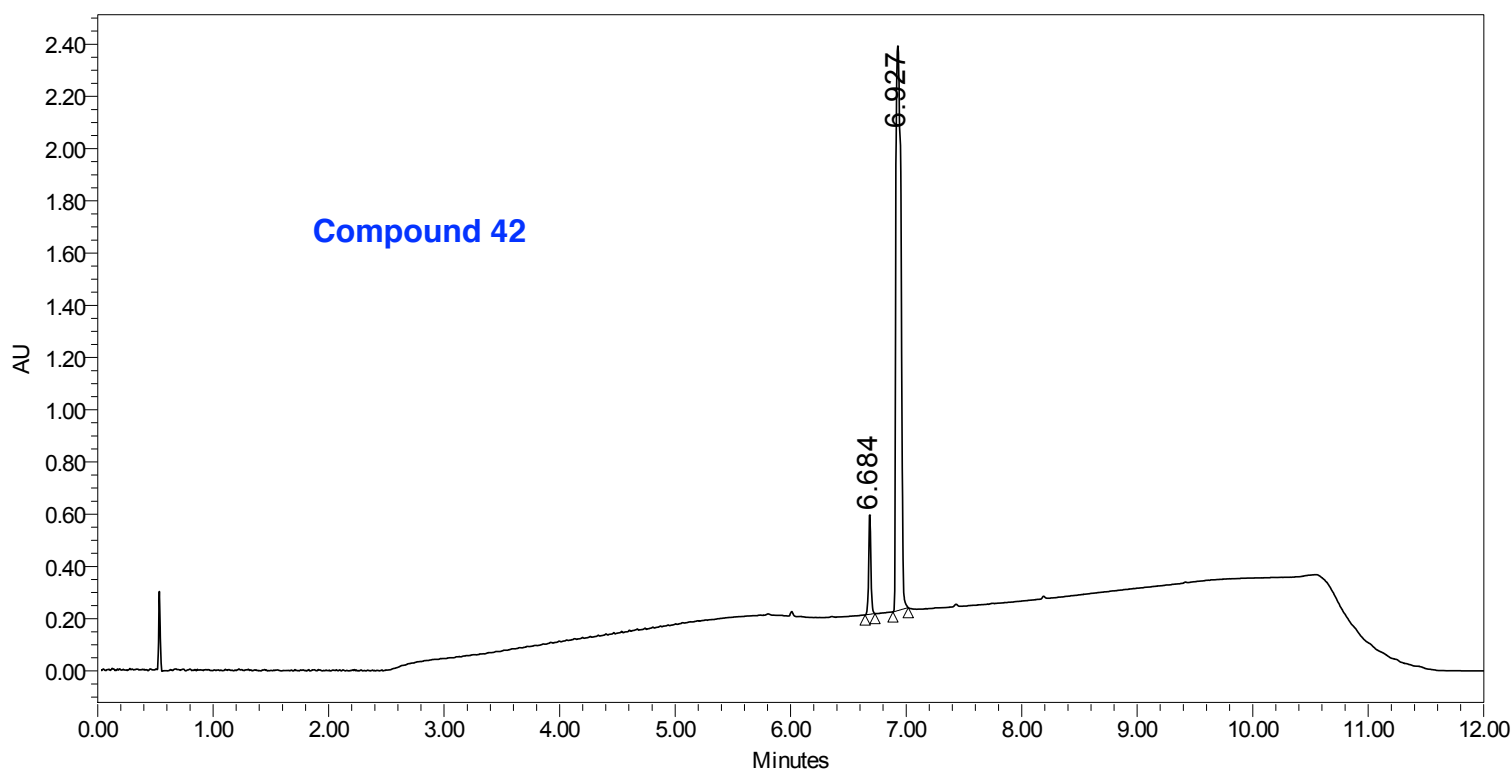

|   | RT    | Area    | % Area | Height  | Peak<br>Lambda Max. |
|---|-------|---------|--------|---------|---------------------|
| 1 | 6.684 | 511370  | 7.08   | 380475  | 359.5               |
| 2 | 6.927 | 6712585 | 92.92  | 2162816 | 259.4               |

JMT193

Consistency: Unknown\*, unknown  
purity\*

Data set 1H: JMT193 1 1 /opt/topspin4.1.3  
Structure: /opt/topspin4.1.3/JMT193/1/structure.mol  
Acquisition date: July 19, 2021 3:05:59 PM EDT  
Solvent: Acetone  
Probe: 5 mm PATXI 1H/D/19F-13C/15N Z-GRD Z855801/0017  
Eretic reference:

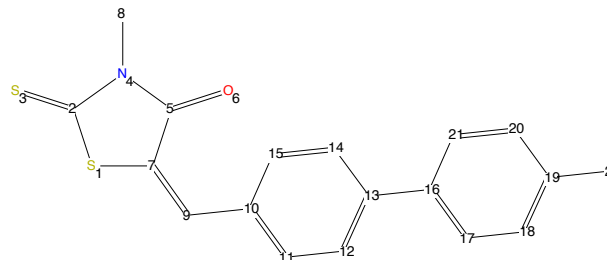

Sum formula:  
C<sub>18</sub>H<sub>15</sub>NOS<sub>2</sub>

Molecular Mass:  
325.06 Da

**Comments:**  
Multiplet interpretation available for spectrum.  
A multiplet interpretation for all major signals in the spectrum could be found. All given impurities could be assigned to regions in the spectrum.

**Signature:**

Automatic analysis generated by Bruker CMC (b:17).  
One or more results have not been created by automatic analysis, or edited manually: marked by '\*'.  
Report generated by Bruker CMC-assist TopSpin 4.1.3 (of 2021-06-28 13:00:50), on 'MacBook-Pro.local' as 'tzbenton'

Compound 43

7.87 [9], [15]\*  
7.85 [14, 12]\*  
7.86 [21, 12]\*  
7.31 [20, 18]\*

3.51 [9]\*

2.37 [22]\*

2.76 [H<sub>2</sub>O]

2.04 [ACETONE]

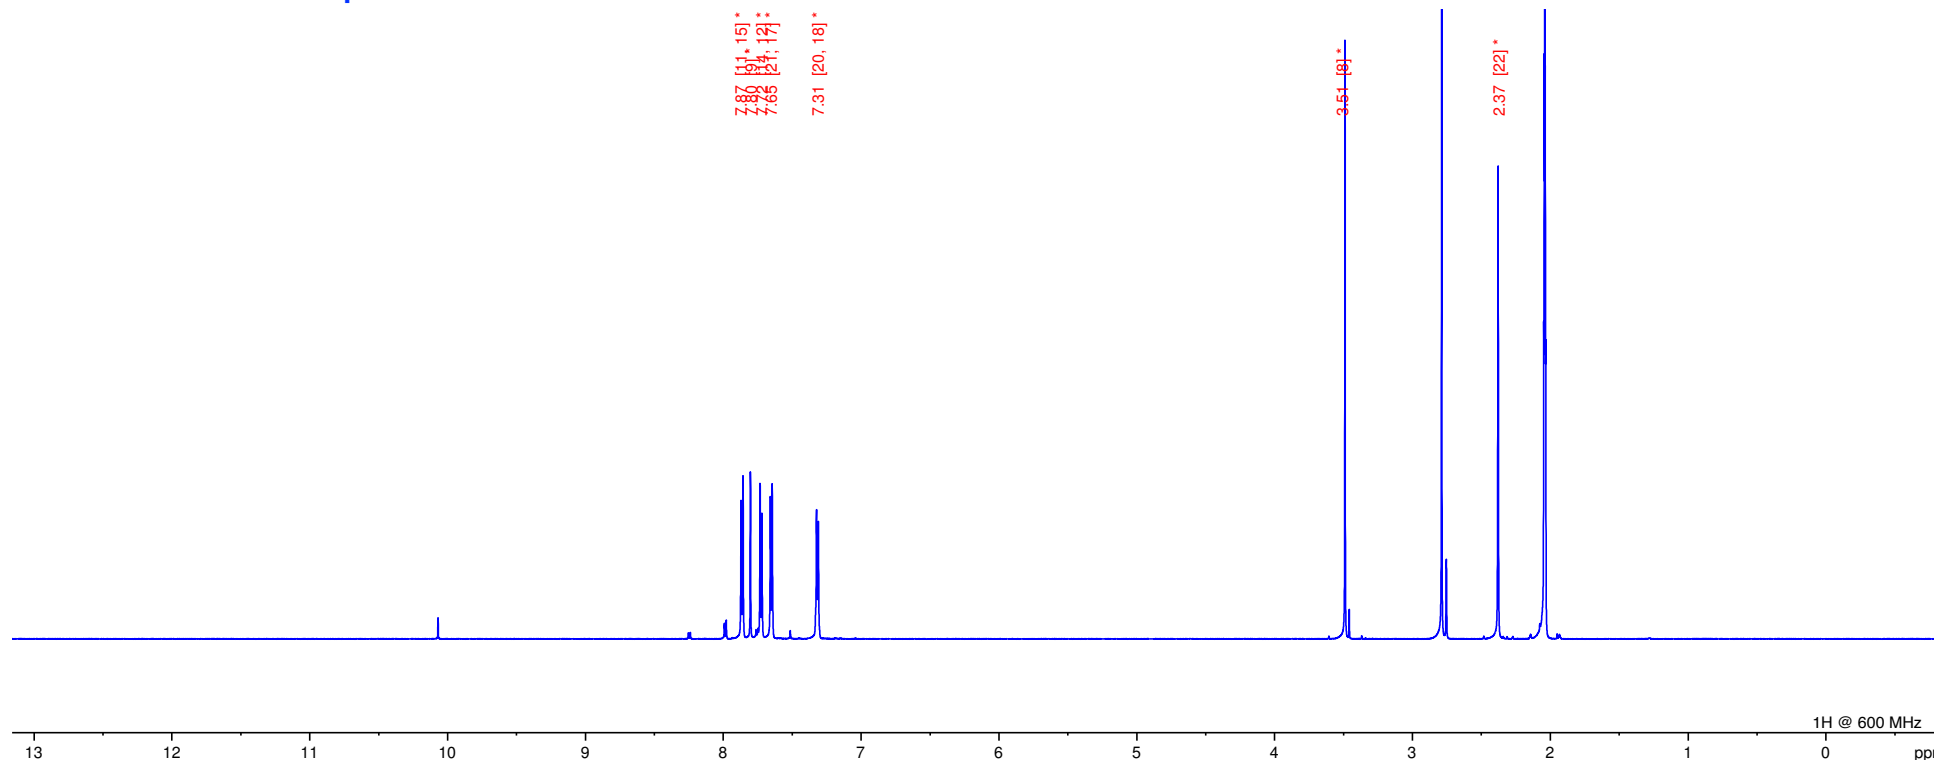

1H @ 600 MHz  
ppm

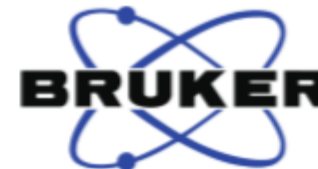

Current Data Parameters  
NAME CMM210917  
EXPNO 7  
PROCNO 1

F2 - Acquisition Parameters  
Date\_ 20210917  
Time 14.55  
INSTRUM spect  
PROBHD 5 mm PATXI 1H/  
PULPROG jmod  
TD 65536  
SOLVENT DMSO  
NS 1000  
DS 4  
SWH 36057.691 Hz  
FIDRES 0.550197 Hz  
AQ 0.9087659 sec  
RG 2050  
DW 13.867 usec  
DE 6.50 usec  
TE 302.0 K  
CNST2 145.0000000  
CNST11 1.0000000  
D1 2.00000000 sec  
D20 0.00689655 sec  
TD0 1

===== CHANNEL f1 =====  
SFO1 150.9178988 MHz  
NUC1 13C  
P1 11.80 usec  
P2 23.60 usec  
PLW1 202.10000610 W

===== CHANNEL f2 =====  
SFO2 600.1324005 MHz  
NUC2 1H  
CPDPRG2 waltz16  
PCPD2 70.00 usec  
PLW2 13.69999981 W  
PLW12 0.17449000 W

F2 - Processing parameters  
SI 32768  
SF 150.9028090 MHz  
WDW EM  
SSB 0  
LB 1.00 Hz  
GB 0  
PC 1.40

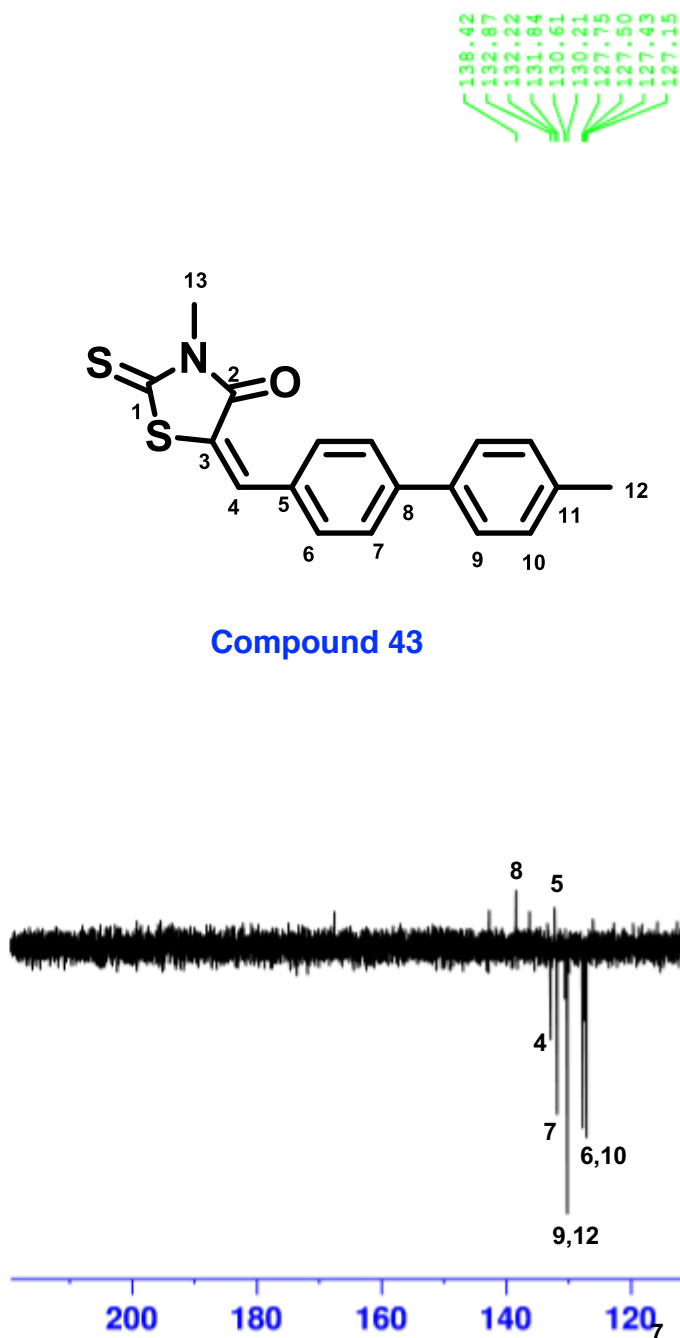

Compound 43

Dimethyl sulfoxide - d<sub>6</sub>

# SAMPLE INFORMATION

|                                          |              |                     |                                 |
|------------------------------------------|--------------|---------------------|---------------------------------|
| Sample Name:                             | 193          | Acquired By:        | System                          |
| Sample Type:                             | Unknown      | Sample Set Name     | 103dx_JMT                       |
| Vial:                                    | 1:A,1        | Acq. Method Set:    | ReversePhase_12min_Max Plot     |
| Injection #:                             | 1            | Processing Method:  | ReversePhase_Purity_MAX Plot    |
| Injection Volume:                        | 1.00 ul      | Channel Name:       | PDA Max Plot 190.0 - 800.0      |
| Run Time:                                | 12.0 Minutes | Proc. Chnl. Descr.: | PDA MaxPlot (190.0 nm to 800.0) |
| Date Acquired: 7/27/2021 6:40:58 PM EDT  |              |                     |                                 |
| Date Processed: 8/31/2021 3:59:11 PM EDT |              |                     |                                 |

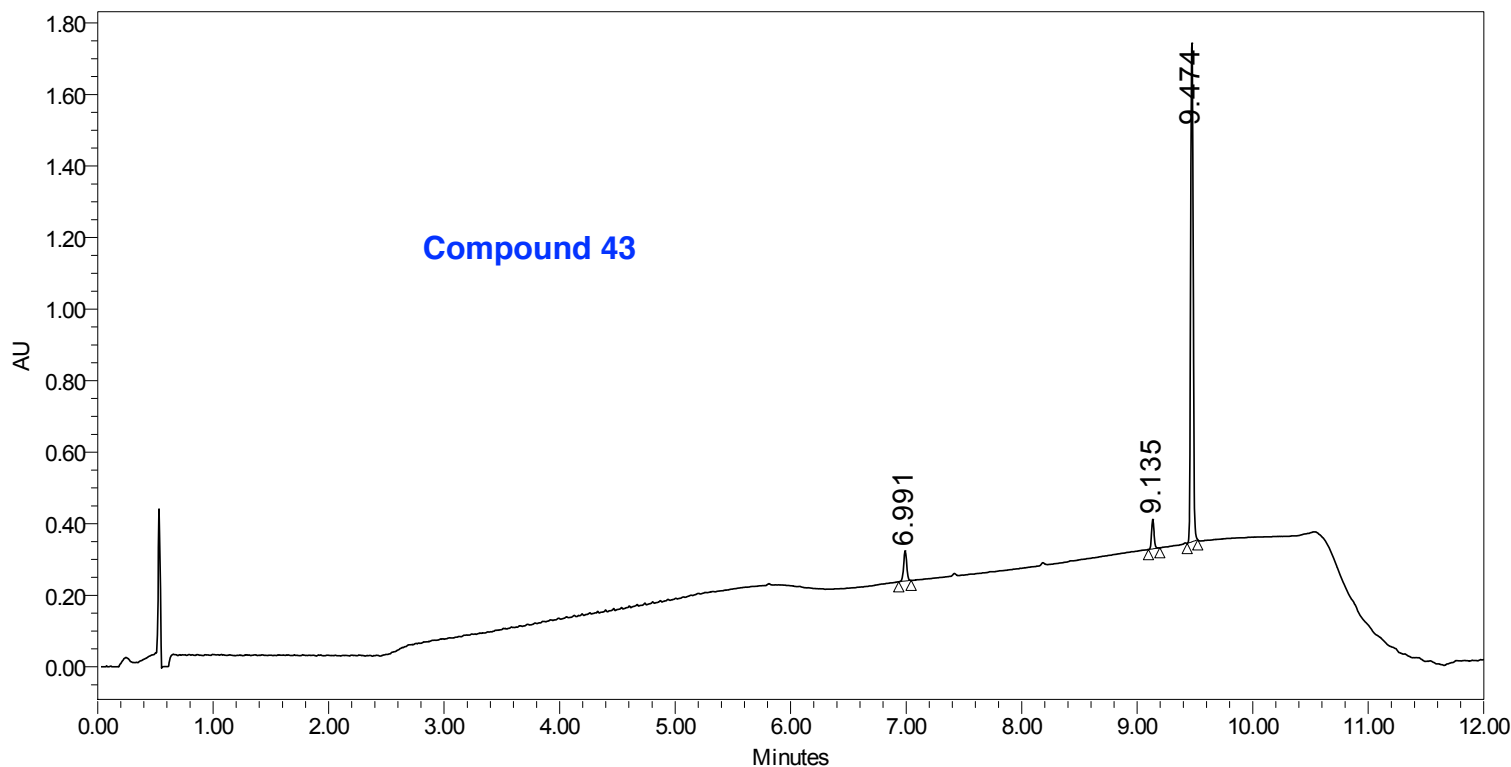

|   | RT    | Area    | % Area | Height  | Peak<br>Lambda Max. |
|---|-------|---------|--------|---------|---------------------|
| 1 | 6.991 | 154167  | 6.43   | 84249   | 298.7               |
| 2 | 9.135 | 121661  | 5.07   | 82622   | 399.3               |
| 3 | 9.474 | 2123174 | 88.50  | 1394426 | 392.4               |

JMT194

Consistency: Unknown\*, unknown  
purity\*

Data set 1H: JMT194 1 1 /opt/topspin4.1.3  
Structure: /opt/topspin4.1.3/JMT194/1/structure.mol  
Acquisition date: July 19, 2021 2:59:06 PM EDT  
Solvent: Acetone  
Probe: 5 mm PATXI 1H/D/19F-13C/15N Z-GRD Z855801/0017  
Eretic reference:

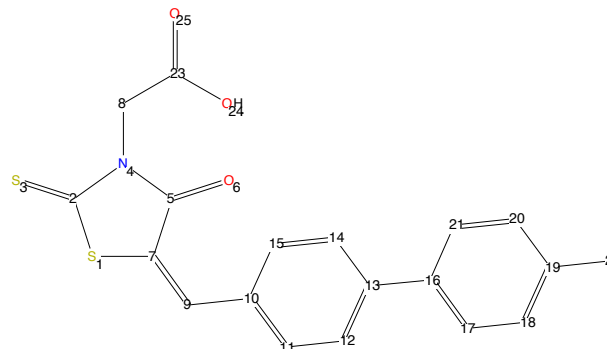

Sum formula:  
C<sub>19</sub>H<sub>15</sub>NO<sub>3</sub>S<sub>2</sub>

Molecular Mass:  
369.05 Da

**Comments:**  
Multiplet interpretation available for spectrum. Multiplet interpretation available for spectrum.  
A multiplet interpretation for all major signals in the spectrum could be found. All given impurities could be assigned to regions in the spectrum. A multiplet interpretation for all major signals in the spectrum could be found. All given impurities could be assigned to regions in the spectrum.

Signature:

Automatic analysis generated by Bruker CMC (b:17).  
One or more results have not been created by automatic analysis, or edited manually: marked by '\*'.  
Report generated by Bruker CMC-assist TopSpin 4.1.3 (of 2021-06-28 13:00:50), on 'MacBook-Pro.local' as 'tzbenton'

Compound 44

8.00 [s, 12H]  
2.06 [ACETONE]  
1.32 [m, 1H]

7.84 [9, 15]\*  
7.75 [12, 14]\*  
7.63 [21, 17]\*  
7.35 [20, 18]\*

4.86 [8]\*

2.41 [22]\*

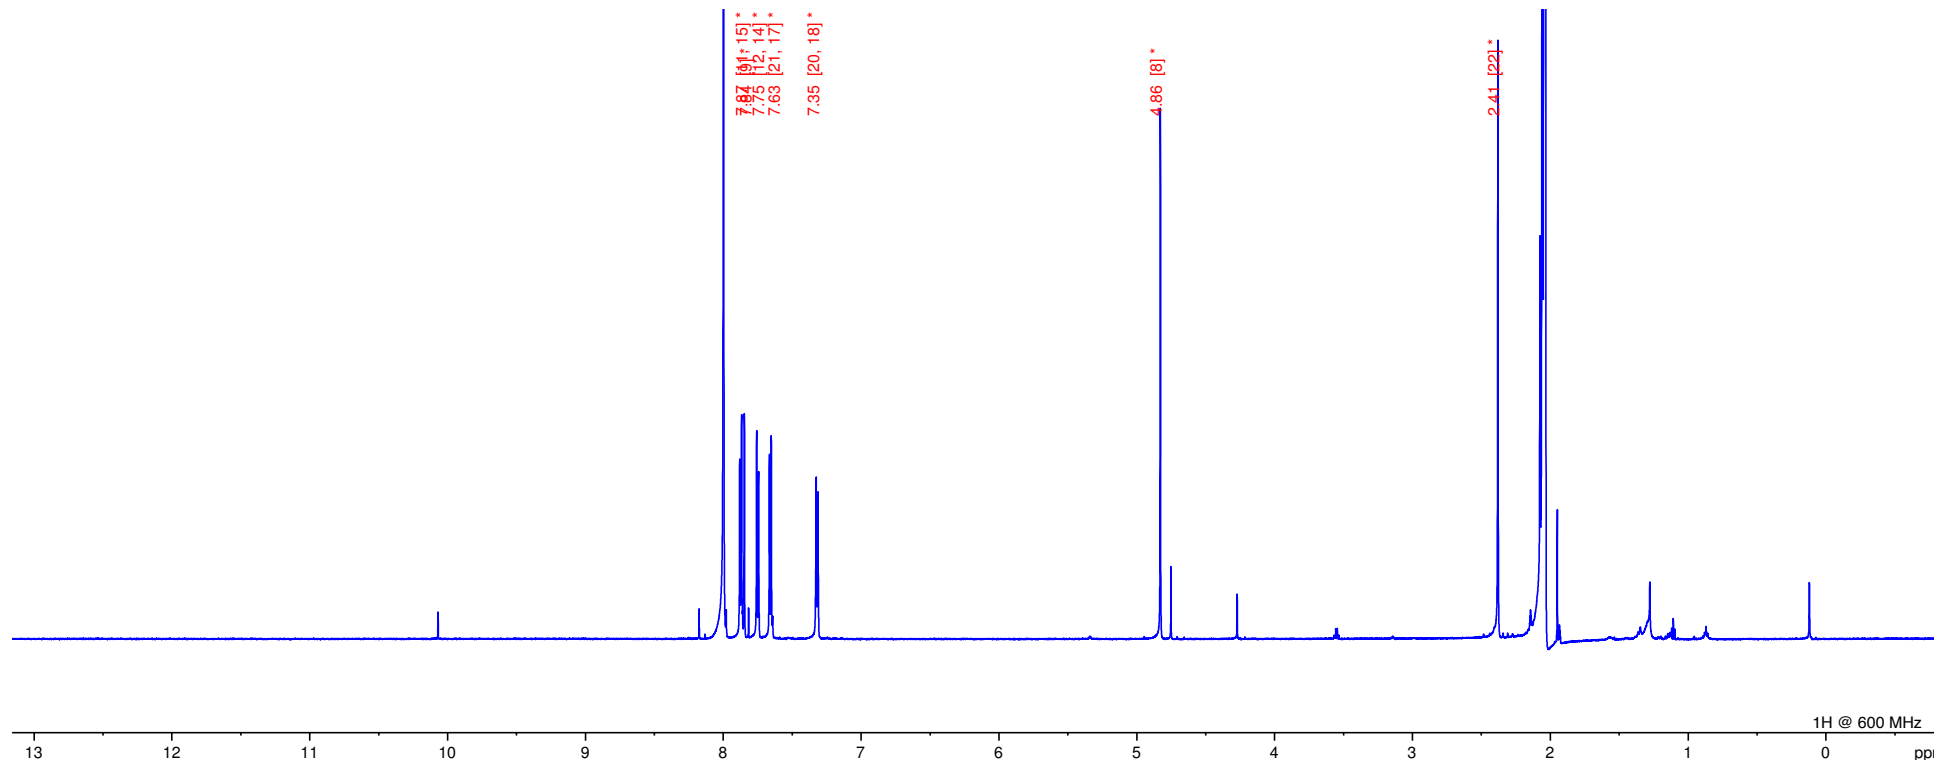

1H @ 600 MHz  
ppm

44 (JMT-194)

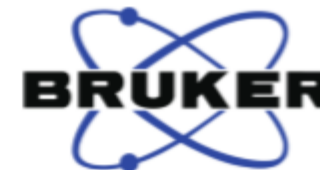

Current Data Parameters  
 NAME CMM210915  
 EXPNO 4  
 PROCNO 1

F2 - Acquisition Parameters  
 Date\_ 20210915  
 Time 12.46  
 INSTRUM spect  
 PROBD 5 mm PATXI 1H/  
 PULPROG jmod  
 TD 65536  
 SOLVENT DMSO  
 NS 1000  
 DS 4  
 SWH 36057.691 Hz  
 FIDRES 0.550197 Hz  
 AQ 0.9087659 sec  
 RG 2050  
 DW 13.867 usec  
 DE 6.50 usec  
 TE 301.2 K  
 CNST2 145.0000000  
 CNST11 1.0000000  
 D1 2.00000000 sec  
 D20 0.00689655 sec  
 TD0 1

===== CHANNEL f1 =====  
 SFO1 150.9178988 MHz  
 NUC1 13C  
 P1 11.80 usec  
 P2 23.60 usec  
 PLW1 202.10000610 W

===== CHANNEL f2 =====  
 SFO2 600.1324005 MHz  
 NUC2 1H  
 CPDPRG[2] waltz16  
 PCPD2 70.00 usec  
 PLW2 13.69999981 W  
 PLW12 0.17449000 W

F2 - Processing parameters  
 SI 32768  
 SF 150.9028090 MHz  
 WDW EM  
 SSB 0  
 LB 1.00 Hz  
 GB 0  
 PC 1.40

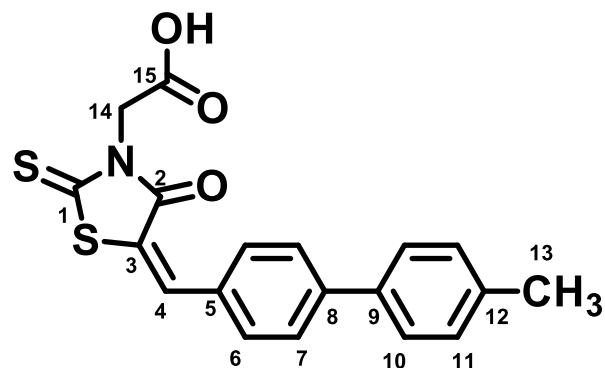

Compound 44

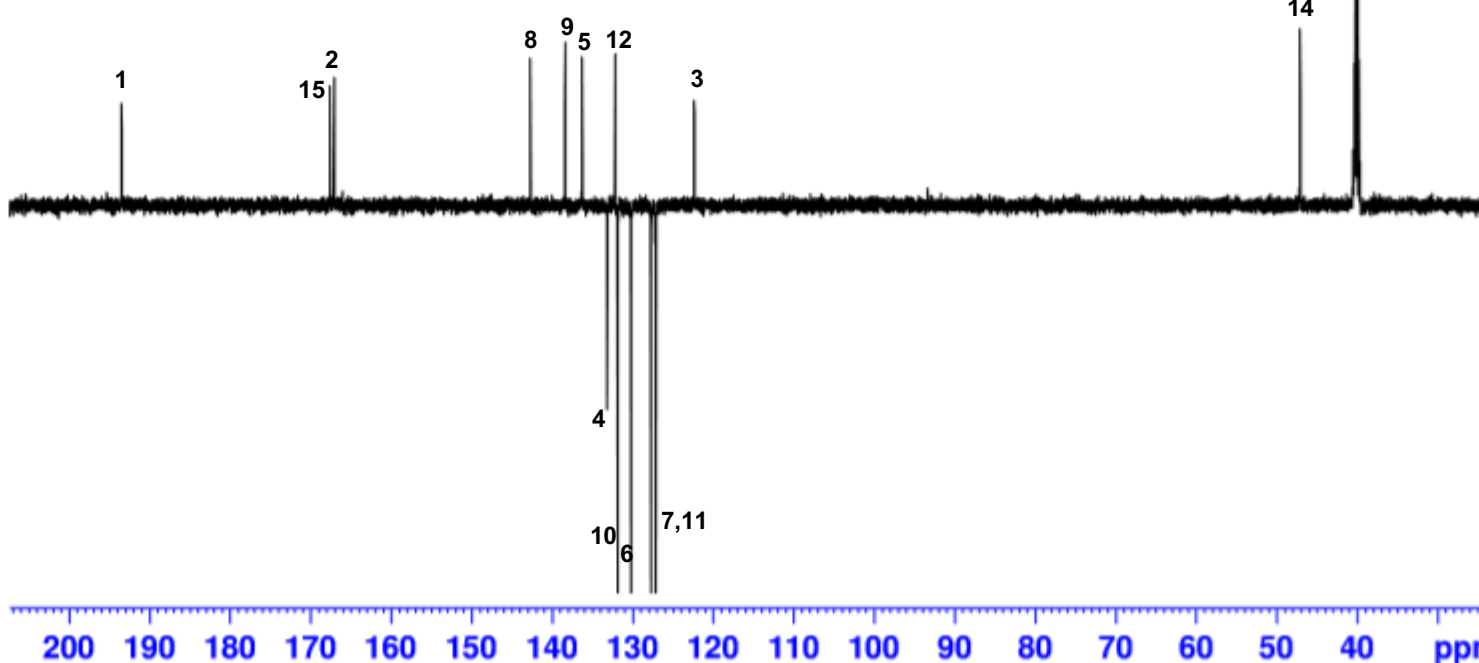



# SAMPLE INFORMATION

|                                          |              |                     |                                 |
|------------------------------------------|--------------|---------------------|---------------------------------|
| Sample Name:                             | 194          | Acquired By:        | System                          |
| Sample Type:                             | Unknown      | Sample Set Name     | 103dx_JMT                       |
| Vial:                                    | 1:A,3        | Acq. Method Set:    | ReversePhase_12min_Max Plot     |
| Injection #:                             | 1            | Processing Method:  | ReversePhase_Purity_MAX Plot    |
| Injection Volume:                        | 1.00 ul      | Channel Name:       | PDA Max Plot 190.0 - 800.0      |
| Run Time:                                | 12.0 Minutes | Proc. Chnl. Descr.: | PDA MaxPlot (190.0 nm to 800.0) |
| Date Acquired: 7/27/2021 7:06:09 PM EDT  |              |                     |                                 |
| Date Processed: 8/31/2021 4:11:37 PM EDT |              |                     |                                 |

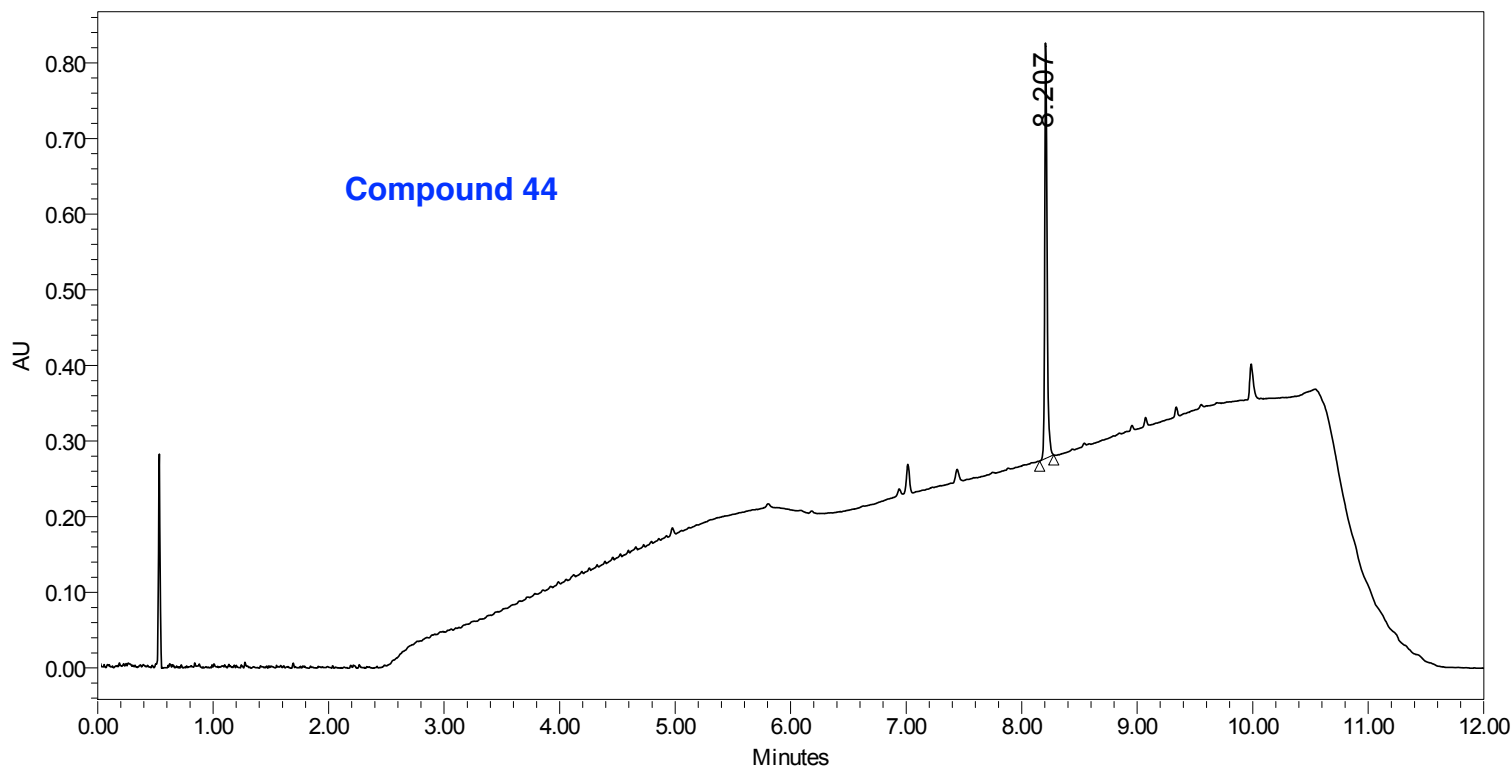

|   | RT    | Area   | % Area | Height | Peak<br>Lambda Max. |
|---|-------|--------|--------|--------|---------------------|
| 1 | 8.207 | 782016 | 100.00 | 551272 | 394.3               |

CMM210625

Consistency: Unknown\*, unknown  
purity\*

Data set 1H: CMM210625 5 1 /opt/topspin4.1.3  
Structure: /opt/topspin4.1.3/CMM210625/5/structure.mol  
Acquisition date: June 25, 2021 2:52:22 PM EDT  
Solvent: DMSO  
Probe: 5 mm PATXI 1H/D/19F-13C/15N Z-GRD Z855801/0017  
Eretic reference:

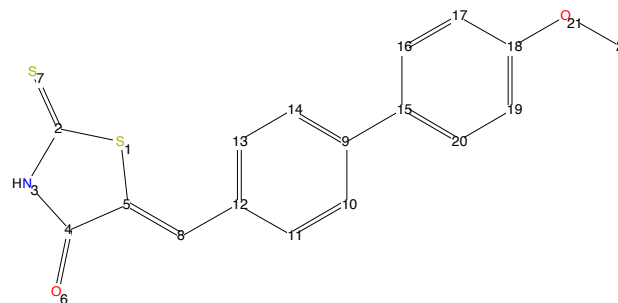

Sum formula:  
C<sub>17</sub>H<sub>13</sub>NO<sub>2</sub>S<sub>2</sub>

Molecular Mass:  
327.04 Da

**Comments:**  
Multiplet interpretation available for spectrum.  
A multiplet interpretation for all major signals in the spectrum could be found. All given impurities could be assigned to regions in the spectrum.

**Signature:**

Automatic analysis generated by Bruker CMC (b:17).  
One or more results have not been created by automatic analysis, or edited manually: marked by '\*'.  
Report generated by Bruker CMC-assist TopSpin 4.1.3 (of 2021-06-28 13:00:50), on 'MacBook-Pro.local' as 'tzbenton'

Compound 45

7.82 [13, 11]\*  
7.66 [8, 17, 19, 14, 10]\*  
7.07 [16, 20]\*

3.31 [H<sub>2</sub>O]  
2.49 [DMSO]

3.84 [22]\*

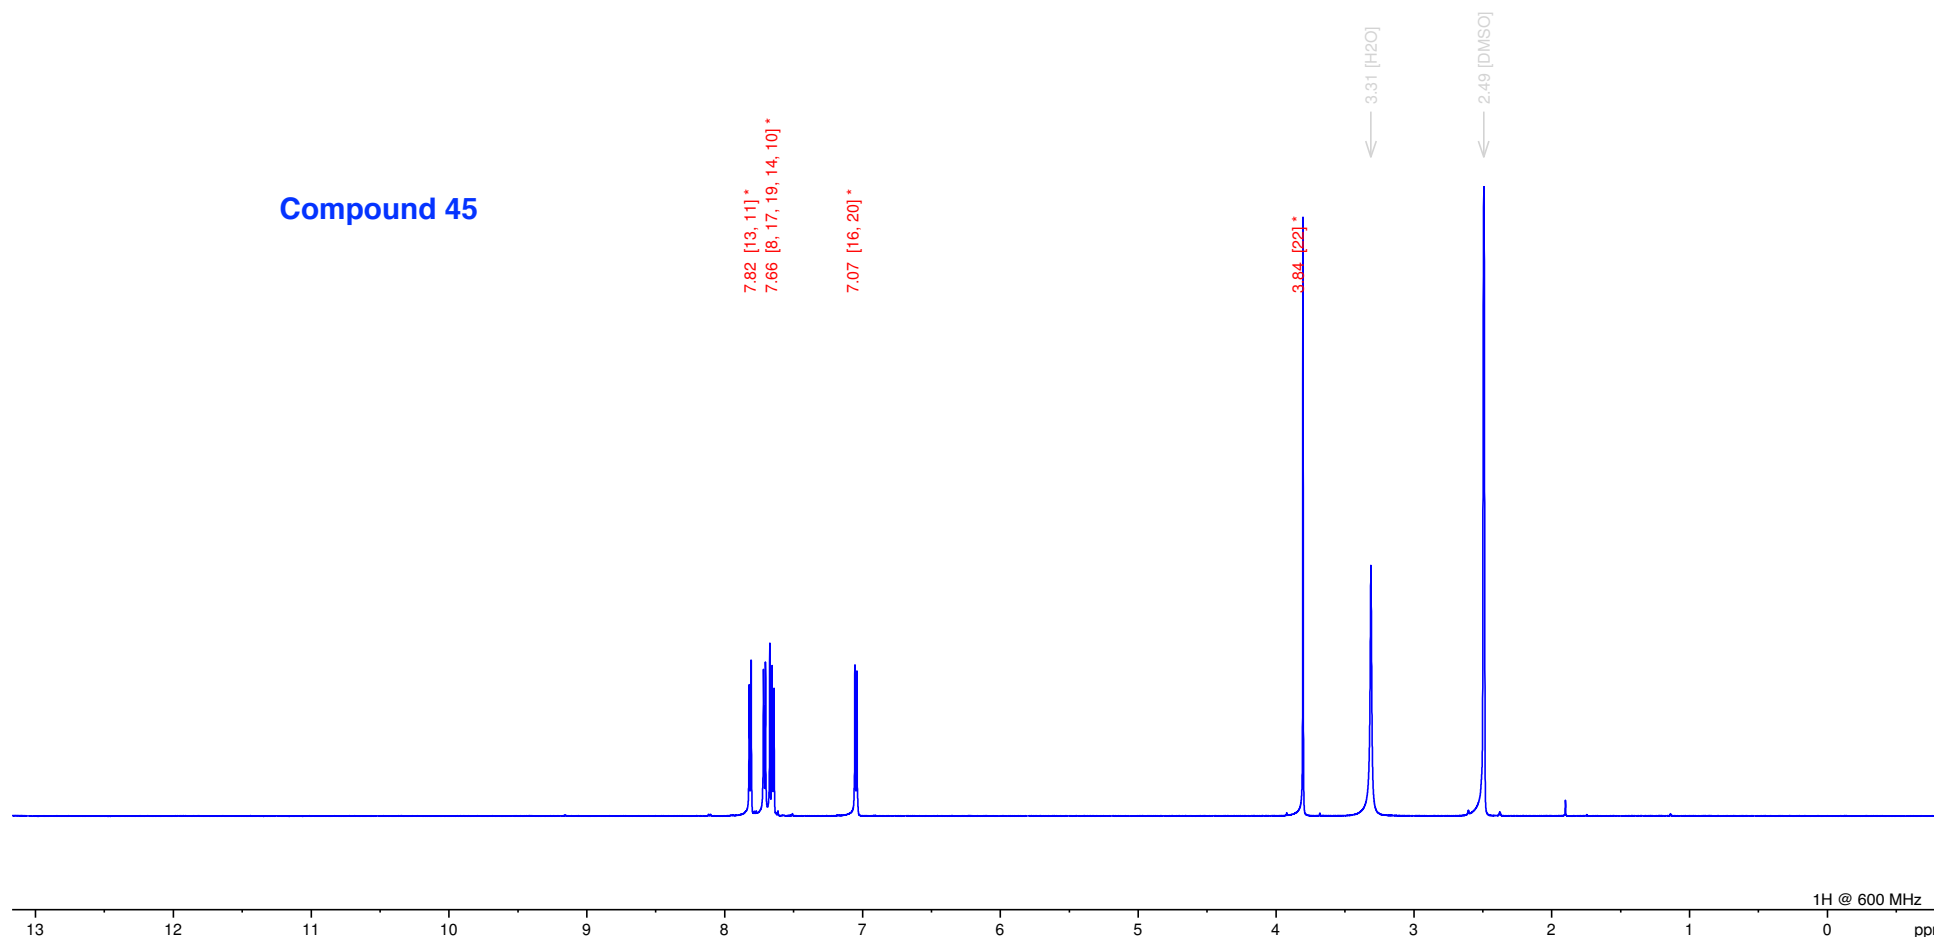

1H @ 600 MHz  
ppm

45 (JMT-170)

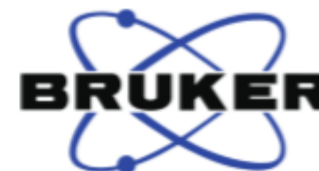

Current Data Parameters  
NAME CMM210915  
EXPNO 6  
PROCNO 1

F2 - Acquisition Parameters  
Date\_ 20210915  
Time 14.58  
INSTRUM spect  
PROBHD 5 mm PATXI 1H/  
PULPROG jmod  
TD 65536  
SOLVENT DMSO  
NS 1000  
DS 4  
SWH 36057.691 Hz  
FIDRES 0.550197 Hz  
AQ 0.9087659 sec  
RG 2050  
DW 13.867 usec  
DE 6.50 usec  
TE 301.3 K  
CNST2 145.000000  
CNST11 1.000000  
D1 2.0000000 sec  
D20 0.00689655 sec  
TD0 1

===== CHANNEL f1 =====  
SFO1 150.9178988 MHz  
NUC1 13C  
P1 11.80 usec  
P2 23.60 usec  
PLW1 202.10000610 W

===== CHANNEL f2 =====  
SFO2 600.1324005 MHz  
NUC2 1H  
CPDPRG[2] waltz16  
PCPD2 70.00 usec  
PLW2 13.69999981 W  
PLW12 0.17449000 W

F2 - Processing parameters  
SI 32768  
SF 150.9028090 MHz  
WDW EM  
SSB 0  
LB 1.00 Hz  
GB 0  
PC 1.40

Dimethyl sulfoxide - d<sub>6</sub>

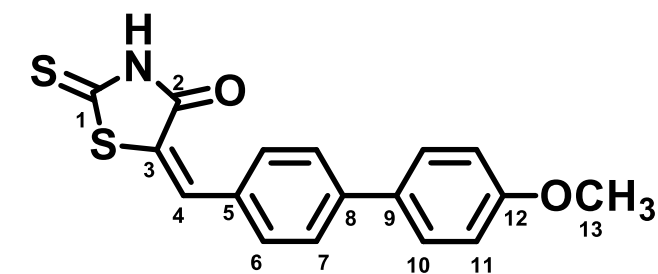

Compound 45

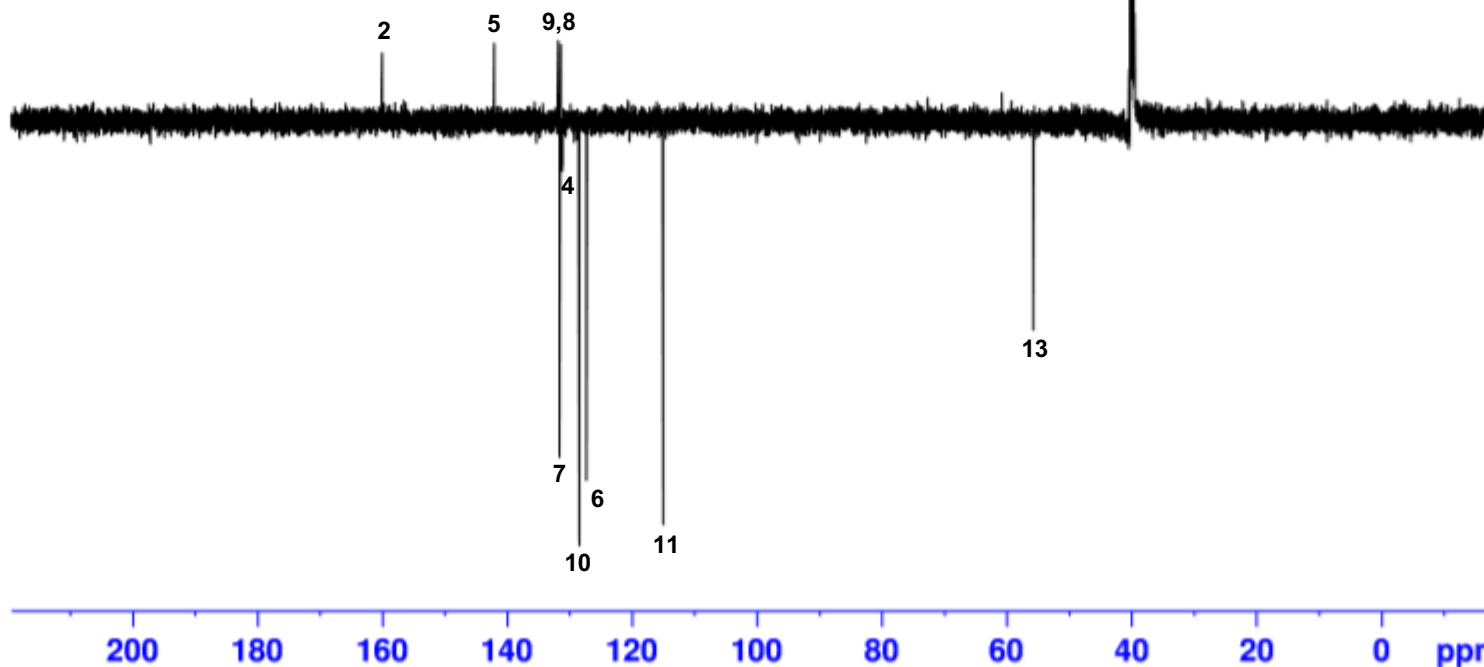

# SAMPLE INFORMATION

|                   |                           |                     |                                 |
|-------------------|---------------------------|---------------------|---------------------------------|
| Sample Name:      | 2021June24_MJF_30         | Acquired By:        | System                          |
| Sample Type:      | Unknown                   | Sample Set Name     | TZB_103dx                       |
| Vial:             | 1:A,4                     | Acq. Method Set:    | ReversePhase_12min_Max Plot     |
| Injection #:      | 1                         | Processing Method:  | ReversePhase_Purity_MAX Plot    |
| Injection Volume: | 5.00 ul                   | Channel Name:       | PDA Max Plot 190.0 - 800.0      |
| Run Time:         | 12.0 Minutes              | Proc. Chnl. Descr.: | PDA MaxPlot (190.0 nm to 800.0) |
|                   |                           |                     |                                 |
| Date Acquired:    | 6/24/2021 10:47:26 AM EDT |                     |                                 |
| Date Processed:   | 8/31/2021 4:01:45 PM EDT  |                     |                                 |

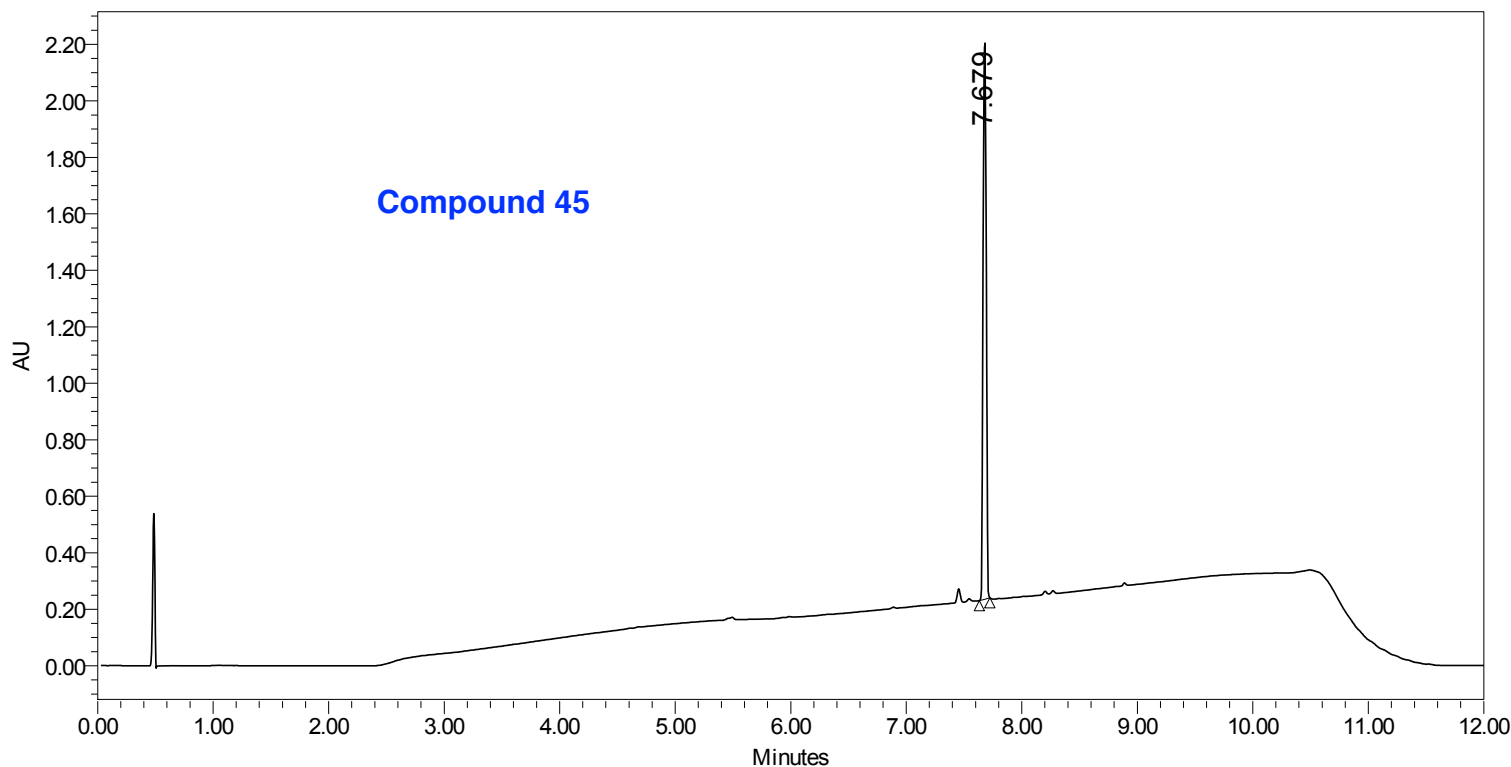

|   | RT    | Area    | % Area | Height  | Peak<br>Lambda Max. |
|---|-------|---------|--------|---------|---------------------|
| 1 | 7.679 | 3784346 | 100.00 | 1973427 | 393.1               |

CMM210618

Consistency: Unknown\*, unknown  
purity\*

Data set 1H: CMM210618 2 1 /opt/topspin4.1.3  
Structure: /opt/topspin4.1.3/CMM210618/2/structure.mol  
Acquisition date: June 18, 2021 3:08:52 PM EDT  
Solvent: DMSO  
Probe: 5 mm PATXI 1H/D/19F-13C/15N Z-GRD Z855801/0017  
Eretic reference:

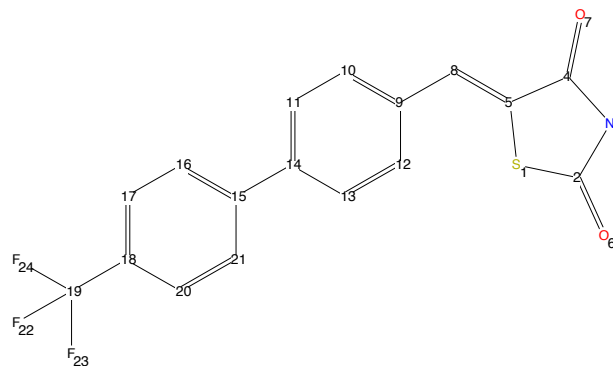

Sum formula:  
C<sub>17</sub>H<sub>10</sub>F<sub>3</sub>NO<sub>2</sub>S

Molecular Mass:  
349.04 Da

Comments:  
Multiplet interpretation available for spectrum.  
A multiplet interpretation for all major signals in the spectrum could be found. All given impurities could be assigned to regions in the spectrum.

Signature:

Automatic analysis generated by Bruker CMC (b:17).  
One or more results have not been created by automatic analysis, or edited manually: marked by '\*'.  
Report generated by Bruker CMC-assist TopSpin 4.1.3 (of 2021-06-28 13:00:50), on 'MacBook-Pro.local' as 'tzbenton'

Compound 46

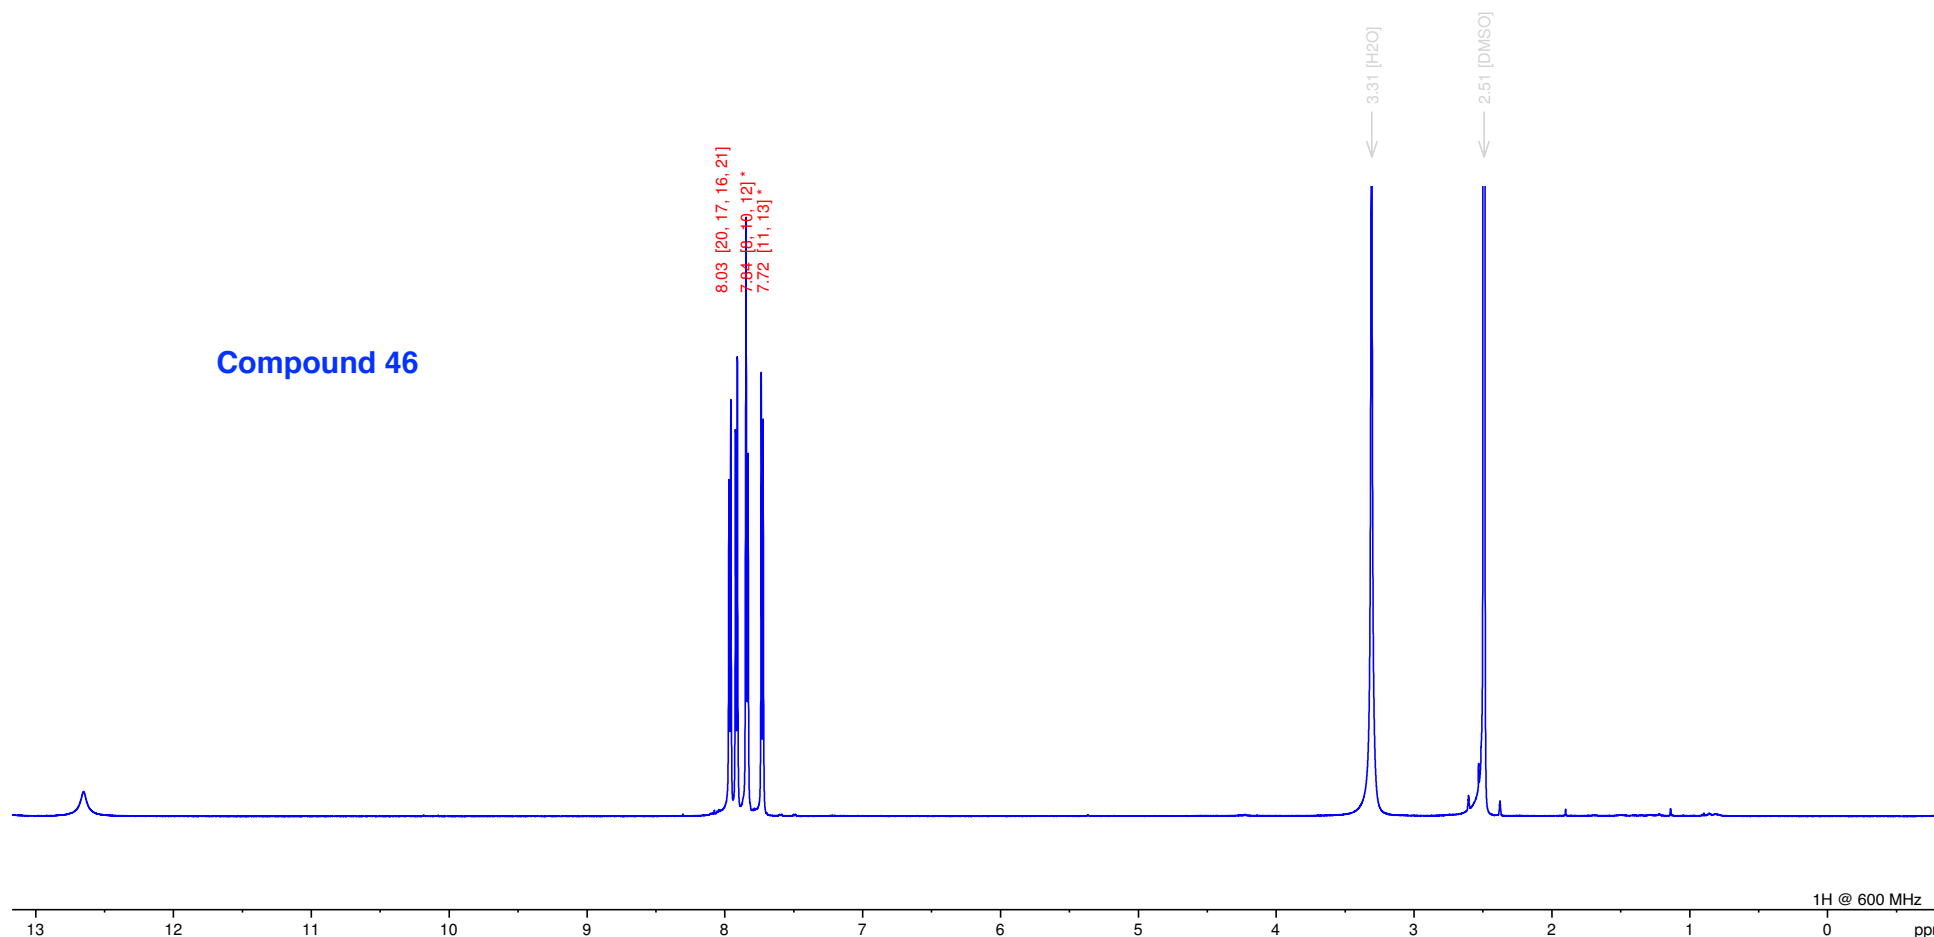

46 (JMT200)

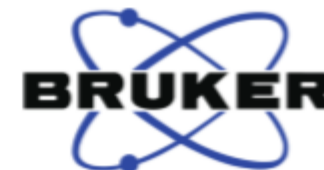

Compound 46

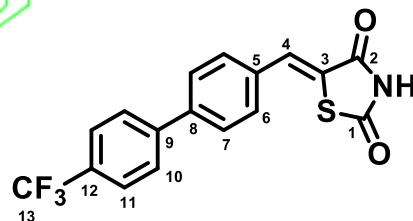

Dimethyl sulfoxide - d<sub>6</sub>

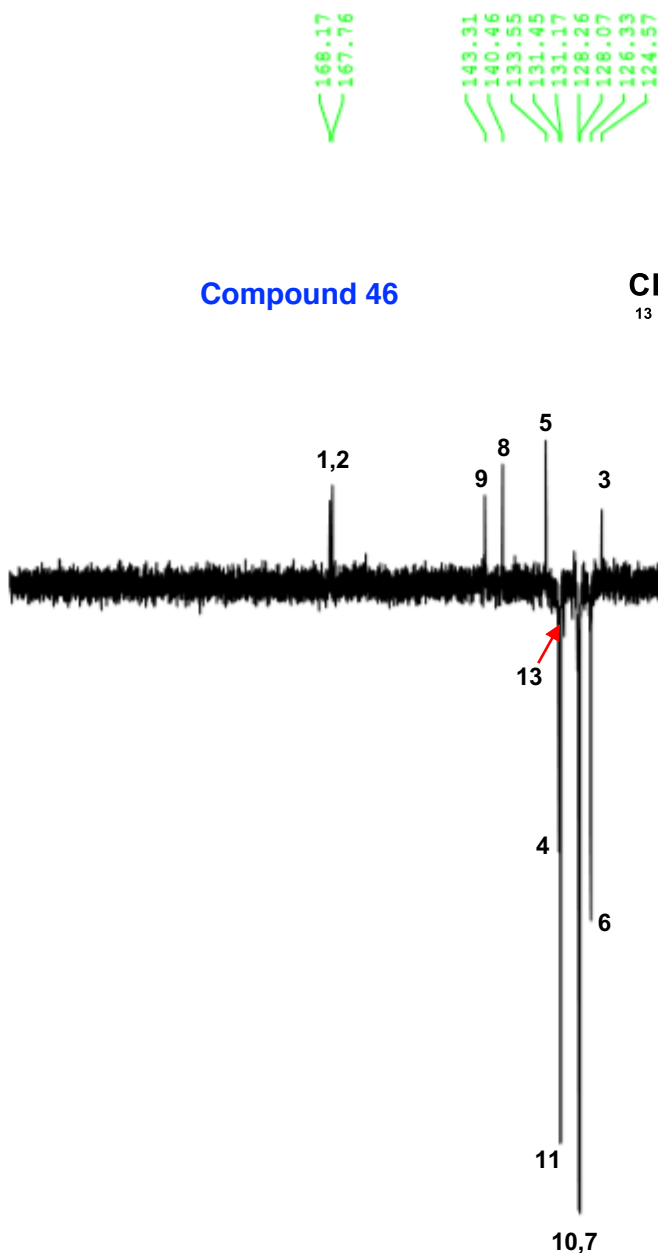

Current Data Parameters

NAME CMM210917  
EXPNO 5  
PROCNO 1

F2 - Acquisition Parameters

Date\_ 20210917  
Time 12.45  
INSTRUM spect  
PROBHD 5 mm PATXI 1H/  
PULPROG jmod  
TD 65536  
SOLVENT DMSO  
NS 1000  
DS 4  
SWH 36057.691 Hz  
FIDRES 0.550197 Hz  
AQ 0.9087659 sec  
RG 2050  
DW 13.867 usec  
DE 6.50 usec  
TE 304.1 K  
CNST2 145.0000000  
CNST11 1.0000000  
D1 2.00000000 sec  
D20 0.00689655 sec  
TD0 1

===== CHANNEL f1 =====  
SFO1 150.9178988 MHz  
NUC1 13C  
P1 11.80 usec  
P2 23.60 usec  
PLW1 202.10000610 W

===== CHANNEL f2 =====  
SFO2 600.1324005 MHz  
NUC2 1H  
CPDPRG[2] waltz16  
PCPD2 70.00 usec  
PLW2 13.69999981 W  
PLW12 0.17449000 W

F2 - Processing parameters

SI 32768  
SF 150.9028090 MHz  
WDW EM  
SSB 0  
LB 1.00 Hz  
GB 0  
PC 1.40

# SAMPLE INFORMATION

|                   |                          |                     |                                 |
|-------------------|--------------------------|---------------------|---------------------------------|
| Sample Name:      | Ds3                      | Acquired By:        | System                          |
| Sample Type:      | Unknown                  | Sample Set Name     | 103dx_JMT                       |
| Vial:             | 1:A,7                    | Acq. Method Set:    | ReversePhase_12min_Max Plot     |
| Injection #:      | 1                        | Processing Method:  | ReversePhase_Purity_MAX Plot    |
| Injection Volume: | 1.00 ul                  | Channel Name:       | PDA Max Plot 190.0 - 800.0      |
| Run Time:         | 12.0 Minutes             | Proc. Chnl. Descr.: | PDA MaxPlot (190.0 nm to 800.0) |
|                   |                          |                     |                                 |
| Date Acquired:    | 7/27/2021 7:56:30 PM EDT |                     |                                 |
| Date Processed:   | 8/31/2021 2:47:35 PM EDT |                     |                                 |

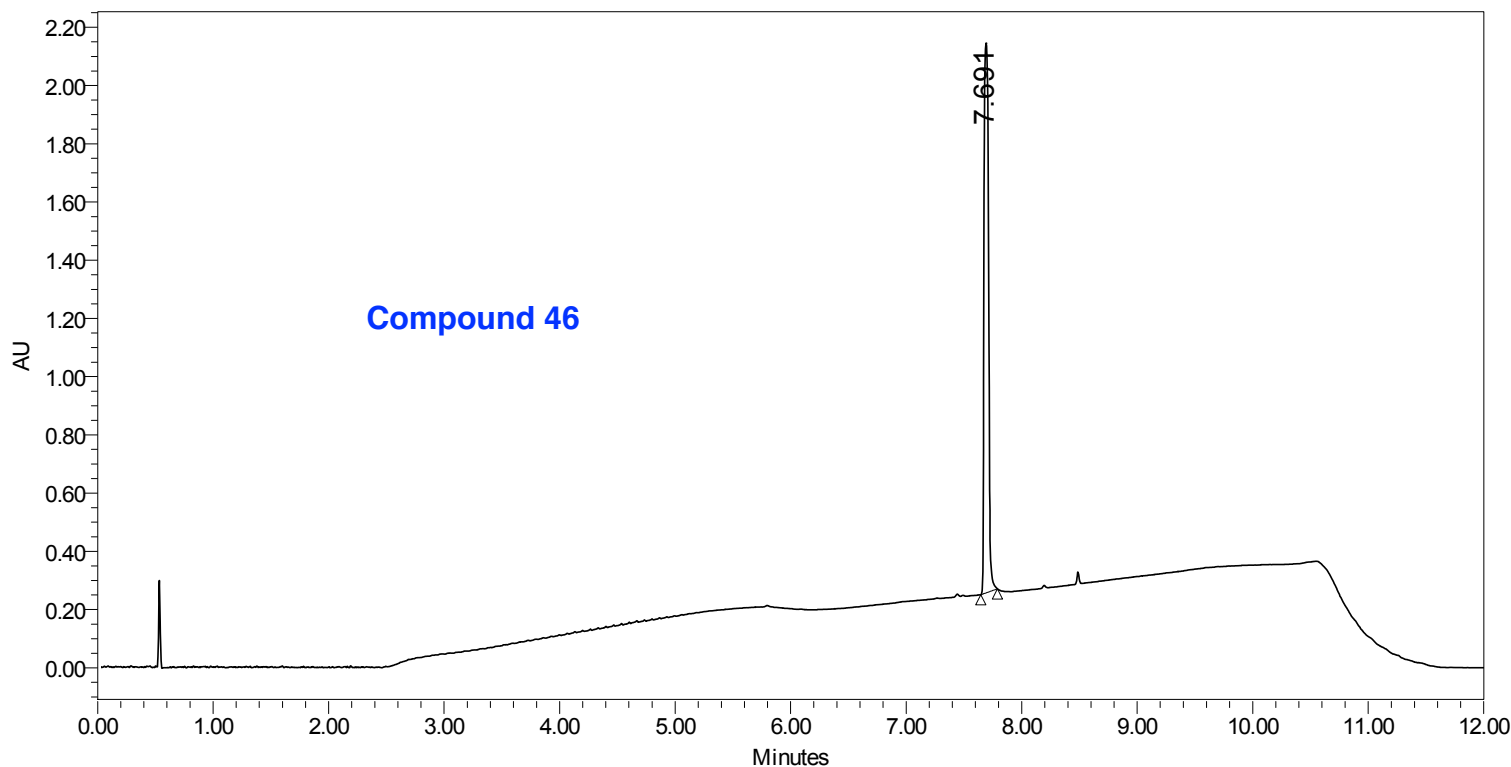

|   | RT    | Area    | % Area | Height  | Peak<br>Lambda Max. |
|---|-------|---------|--------|---------|---------------------|
| 1 | 7.691 | 5106805 | 100.00 | 1888896 | 317.3               |
